# Supplementary material
Source: publisher figshare collection journal article supplement (https://frontiersin.figshare.com/ndownloader/files/31257007)
Supplement: Supplementary file 1 [file 31257007]

## Sheet: magnetic data
Depth (cm)	New Age	Inclination	Declination	Relative paleointensity			Magnetic susceptibility (c)	ARM	ARM/c
0	0	49.6	-59.9	0.0427419
1	0.153333	52.9	-56.4	0.0446026			10.3636	0.0040512	3.90905
2	0.306667	57.7	-52	0.0459335			11.1765	0.0045053	4.03106
3	0.46	61.6	-45.6	0.0463881			11.3	0.0047699	4.22115
4	0.613333	65.7	-40.2	0.0471415			11.6	0.0048895	4.21509
5	0.766667	70	-40.7	0.0478623			11.5	0.0049266	4.284
6	0.92	71.1	-44.3	0.0486416			11.3	0.00492	4.35398
7	1.07333	69.9	-50.9	0.0490863			11	0.0048843	4.44027
8	1.22667	67.6	-56.5	0.0489445			11.1	0.0048174	4.34
9	1.38	69.4	-63.2	0.0481475			11.1	0.0047069	4.24045
10	1.53333	70.7	-66.4	0.0466042			11.2	0.0045582	4.06982
11	1.68667	73.1	-69.5	0.0455615			11.1	0.0044105	3.97342
12	1.84	75.6	-74.1	0.0454599			10.5	0.0043119	4.10657
13	1.99333	76.6	-81.7	0.0463407			9.5	0.0043061	4.53274
14	2.14667	76.5	-85.9	0.0479745			8.7	0.0043785	5.03276
15	2.3	75	-84.1	0.0494687			9.1	0.0045194	4.96637
16	2.45333	72.7	-80.6	0.0509188			10.3	0.0046529	4.51738
17	2.60667	71.2	-73.3	0.0520764			11.6	0.0047708	4.11276
18	2.76	70.5	-73.9	0.0522803			12.8	0.004838	3.77969
19	2.91333	71.1	-72.6	0.0515536			13.7	0.0048506	3.54058
20	3.06667	73.3	-77.8	0.0502929			14.6	0.0048202	3.30151
21	3.22	76.7	-87.6	0.0486124			15.3	0.0047667	3.11549
22	3.37333	81.2	-107.2	0.0471714			15.2	0.004705	3.09539
23	3.52667	83	-122.9	0.0454369			14.5	0.0046358	3.1971
24	3.68	83.7	-128.4	0.0435151			13.3	0.004566	3.43308
25	3.83333	81.8	-115.6	0.0425218			12	0.00451	3.75833
26	3.98667	79.8	-108.3	0.0426982			10.4	0.0045005	4.3274
27	4.14	76.5	-104.5	0.0438201			9.1	0.004543	4.99231
28	4.29333	74.1	-104.5	0.0451613			8.5	0.0046141	5.42835
29	4.44667	71.7	-107.2	0.0462347			9.1	0.0046852	5.14857
30	4.6	71.4	-108.8	0.046833			9.9	0.0047627	4.81081
31	4.75333	71.2	-111.7	0.0469838			10.1	0.0048569	4.80881
32	4.90667	71.5	-116.1	0.0470606			9.5	0.0049755	5.23737
33	5.06	73.2	-124.1	0.0475925			9.1	0.0051012	5.60571
34	5.1055	73.8	-126.9	0.0482285			9.6	0.0052286	5.44646
35	5.151	73.2	-122.9	0.0496541			10.5	0.0053637	5.10829
36	5.1965	73.2	-117	0.0509653			10.7	0.005509	5.1486
37	5.242	72.5	-106.9	0.0529381			10.3	0.0056703	5.50515
38	5.2875	73.3	-96.5	0.0546946			10.1	0.0058317	5.77396
39	5.333	74.8	-84.6	0.0565314			10.5	0.0059666	5.68248
40	5.3785	77.1	-70.7	0.0573822			11.1	0.0060636	5.4627
41	5.424	79.5	-54	0.0573446			11.7	0.0061139	5.22556
42	5.4695	80.1	-41.9	0.0550724			12.1	0.0061349	5.07017
43	5.515	79.8	-37.5	0.0503629			12.2	0.0061314	5.02574
44	5.5605	78.2	-42.6	0.0432176			12.3	0.0061165	4.97276
45	5.606	75	-50.7	0.0333821			12.4	0.006107	4.925
46	5.6515	67.8	-69.5	0.0223128			12.5	0.0061207	4.89656
47	5.697	52.3	-100.6	0.0154624			12.5	0.006167	4.9336
48	5.7425	35.2	-119.8	0.0253485			12.4	0.0062345	5.02782
49	5.788	22.9	-132.5	0.0440909			12.5	0.0063169	5.05352
50	5.8335	18	-139.1	0.0605192			13.3	0.006442	4.84361
51	5.879	12.6	-143.8	0.0660639			14.3	0.0066434	4.64573
52	5.9245	16.8	149.8	0.0589324			15.2	0.0068716	4.52079
53	5.97	23.4	-153.9	0.045511			16.3	0.0070083	4.29957
54	6.0155	40.9	-154.5	0.0338598			18.8	0.0070399	3.74463
55	6.061	67.8	-160.5	0.0336005			19.6	0.0070099	3.57648
56	6.1065	84.9	-72.7	0.0417985			18.4	0.0069924	3.80022
57	6.152	80	-8.4	0.0503338			16.7	0.0070252	4.20671
58	6.1975	75	-4	0.0583679			15.7	0.0071158	4.53236
59	6.243	71.1	-4.9	0.0657349			15.6	0.0072498	4.64731
60	6.2885	68.2	-9.6	0.0741917			16	0.0074005	4.62531
61	6.334	64.7	-18.4	0.0852475			16.3	0.0075328	4.62135
62	6.3795	65.4	-25.4	0.100099			17.3	0.0076243	4.40711
63	6.425	69.1	-27.5	0.116403			18.4	0.0076854	4.17685
64	6.4705	82.3	-14.9	0.132427			18.9	0.0077418	4.09619
65	6.516	84.9	113.9	0.141273			19	0.0078005	4.10553
66	6.5615	75.5	130.9	0.139259			20.2	0.0078647	3.89342
67	6.607	68.7	135	0.129599			21.7	0.0079453	3.66143
68	6.6525	68.5	139	0.116608			21.3	0.0080637	3.78577
69	6.698	72.1	142.3	0.105368			19.7	0.0082257	4.17548
70	6.7435	75.6	145.1	0.0980262			19.2	0.0084038	4.37698
71	6.789	77.6	146.4	0.0938836			19.6	0.0085676	4.37122
72	6.8345	77.9	145.8	0.0911848			21.4	0.0087089	4.06958
73	6.88	77.2	144	0.0891951			24.2	0.0088255	3.6469
74	6.9255	76.5	143	0.0869999			25.6	0.0089064	3.47906
75	6.971	77.8	143.6	0.0850733			24.4	0.0089424	3.66492
76	7.0165	79.7	146.8	0.0839213			23.5	0.008919	3.79532
77	7.062	81.8	152.8	0.0841268			23.2	0.0088365	3.80884
78	7.1075	82.8	158.9	0.0855881			23	0.0086845	3.77587
79	7.153	82.6	160.8	0.0875426			22.9	0.0084643	3.6962
80	7.1985	81	159	0.0892183			22.8	0.0081975	3.59539
81	7.244	78.7	156.6	0.0900128			22.4	0.0079263	3.53853
82	7.2895	76.2	154.7	0.0901576			21.5	0.0076746	3.56958
83	7.335	74	153	0.0896335			20.4	0.0074735	3.66348
84	7.3805	73.2	152.2	0.0885738			19.5	0.0073375	3.76282
85	7.426	72.8	152.6	0.0872151			18.8	0.007253	3.85798
86	7.4715	73.4	154.9	0.0858132			18.5	0.0072019	3.89292
87	7.517	73.7	157.5	0.0844604			18.7	0.0071561	3.82679
88	7.5625	73.3	157.6	0.0813003			19.4	0.0071011	3.66036
89	7.608	72.2	153.8	0.0755864			20.2	0.0070036	3.46713
90	7.6535	71.6	146.9	0.0672562			20.6	0.0068235	3.31238
91	7.699	72.5	136.6	0.056563			20.7	0.0065398	3.15932
92	7.7445	78.4	110.5	0.0451702			20.8	0.0061794	2.97087
93	7.79	73.5	6.8	0.0359767			20.4	0.0058096	2.84784
94	7.8355	44.7	-18.2	0.0374304			19	0.0054968	2.89305
95	7.881	23.3	-24.1	0.0486489			17.2	0.0052606	3.05849
96	7.9265	11.8	-26.3	0.0570969			15.5	0.0051442	3.31884
97	7.972	7.2	-26.6	0.0465159			14.2	0.0051154	3.60239
98	8.0175	-69.9	-121.4	0.00906485			14	0.0051571	3.68364
99	8.063	-13.2	158.5	0.118057			14.9	0.0052736	3.53933
100	8.1085	-6.7	156.2	0.301108			15.9	0.0054752	3.44352
101	8.154	-5.8	155.5	0.507179			16.6	0.0057972	3.49229
102	8.1995	-6.5	154	0.630117			17.7	0.0062316	3.52068
103	8.245	-5.6	152.3	0.624883			19.9	0.0067159	3.37482
104	8.2905	-3.5	150	0.508114			23.8	0.0071977	3.02424
105	8.336	0.5	146.6	0.330365			29.7	0.0076691	2.58219
106	8.3815	10.5	141	0.178721			35.1	0.0081034	2.30866
107	8.427	52.6	127.9	0.114939			36.2	0.0084466	2.33331
108	8.4725	77.2	49.4	0.116372			34.6	0.0086864	2.51052
109	8.518	72.4	3.2	0.125555			34	0.0088252	2.59565
110	8.5635	69.1	0.9	0.129977			33.6	0.0089233	2.65574
111	8.609	68.8	8.7	0.132056			31.8	0.0090331	2.8406
112	8.6545	68.7	16.9	0.133571			28.9	0.0091456	3.16457
113	8.7	68.8	23.1	0.134961			27.1	0.0092302	3.40598
114	8.71867	69.1	27	0.135754			27.5	0.0092612	3.36771
115	8.73733	69.8	29.1	0.136408			28.9	0.0092376	3.1964
116	8.756	70.7	29.7	0.136721			30.1	0.0091763	3.0486
117	8.77467	71.4	29.3	0.136931			29.8	0.0091065	3.05587
118	8.79333	72.3	26.7	0.137143			28.4	0.0090287	3.17912
119	8.812	73.3	22.9	0.137583			27.1	0.0089556	3.30465
120	8.83067	74.7	18.1	0.138719			26.1	0.0089022	3.4108
121	8.84933	76.1	13.3	0.140307			24.9	0.0088776	3.5653
122	8.868	77.5	11	0.142034			23.7	0.0088696	3.74245
123	8.88667	79	15.6	0.143141			23.1	0.0088674	3.8387
124	8.90533	79.9	29.4	0.143626			23.2	0.0088696	3.8231
125	8.924	79.7	47.7	0.143934			23.2	0.0088865	3.83039
126	8.94267	78.7	59.8	0.144553			23.1	0.0089363	3.86853
127	8.96133	77.7	61.8	0.145647			23	0.0090268	3.9247
128	8.98	77.1	58.6	0.146995			22.9	0.0091441	3.99306
129	8.99867	76.5	54	0.148575			23.1	0.0092621	4.00957
130	9.01733	75.5	52.1	0.149837			23.7	0.0093276	3.9357
131	9.036	74.1	53.3	0.150401			24.6	0.0093043	3.78224
132	9.05467	72.5	56.3	0.15051			25.8	0.0091887	3.56151
133	9.07333	71.1	60.6	0.149598			26.5	0.009014	3.40151
134	9.092	70.1	66	0.147587			26.5	0.0087978	3.31992
135	9.11067	69.3	71.6	0.145357			25.8	0.0085782	3.32488
136	9.12933	68.7	76.5	0.143139			25.2	0.0083133	3.29893
137	9.148	68.4	79.8	0.140524			25	0.0080073	3.20292
138	9.16667	69	81.8	0.135735			24.6	0.0076599	3.11378
139	9.18533	70.9	84.6	0.125524			24	0.0072243	3.01013
140	9.204	74.9	95.9	0.107433			22.6	0.0066677	2.95031
141	9.22267	78.5	122.3	0.0879766			21.5	0.0061529	2.86181
142	9.24133	80.3	165.7	0.0679651			20.7	0.0055761	2.69377
143	9.26	75.5	-149.8	0.0507751			18.9	0.0049752	2.63238
144	9.43926	68.6	-129.3	0.0372827			16.8	0.0042975	2.55804
145	9.61852	63.4	-117.6	0.0272534			15.8	0.0034555	2.18703
146	9.79778	63.8	-112.6	0.0193478			15	0.0025955	1.73033
147	9.97704	60.9	-102.6	0.0148828			13	0.001824	1.40308
148	10.1563	87.3	-173.2	0.148575			21.8	0.0068361	3.13583
149	10.3356	87.2	-42.3	0.139546			33.9	0.0080277	2.36805
150	10.5148	82.1	-37.1	0.130403			41.2	0.0089293	2.16731
151	10.6941	78.1	-37.6	0.125206			44.9	0.0095106	2.11817
152	10.8733	75.3	-37.6	0.12369			46.7	0.009854	2.11006
153	11.0526	73.5	-34.6	0.124606			47.5	0.010033	2.11221
154	11.2319	72.1	-29.3	0.126542			48.1	0.010057	2.09085
155	11.4111	70.7	-22.8	0.128411			48.6	0.0099725	2.05195
156	11.5904	69.6	-17.3	0.12918			48.2	0.0098321	2.03985
157	11.7696	69.2	-14.3	0.128349			47.4	0.0096597	2.03791
158	11.9489	69.5	-14.6	0.12599			46.8	0.0094999	2.02989
159	12.1281	70.4	-17.6	0.122633			45.8	0.0093579	2.04321
160	12.3074	71.4	-20.8	0.118565			44.8	0.0092694	2.06906
161	12.4867	72.6	-19.7	0.113182			43.8	0.0092411	2.10984
162	12.6659	74	-11.6	0.107186			43.5	0.0092588	2.12846
163	12.8452	75.5	4	0.101467			43.6	0.0092892	2.13055
164	13.0244	76.3	21.9	0.09851			44.1	0.0092987	2.10855
165	13.2037	77.1	35.8	0.0989322			44.5	0.0092706	2.08328
166	13.383	77.4	44.2	0.101793			43.9	0.0092242	2.10118
167	13.5622	78.5	45.6	0.105436			42.4	0.0092112	2.17245
168	13.7415	79.6	44.4	0.108734			41	0.0092735	2.26183
169	13.9207	80.8	44.5	0.111686			41.4	0.0094116	2.27333
170	14.1	81.9	49.4	0.113864			45.2	0.0095753	2.11843
171	14.2025	82.2	60.5	0.114867			51.3	0.0097331	1.89729
172	14.305	81.6	73.7	0.114411			57.4	0.0098773	1.72078
173	14.4075	80.8	84.3	0.112527			62.5	0.010029	1.60464
174	14.51	80.9	91.3	0.109908			64	0.010256	1.6025
175	14.6125	81.7	94.5	0.1072			61.9	0.010622	1.71599
176	14.715	82.7	91.2	0.105123			62.8	0.011222	1.78694
177	14.8175	83	76.4	0.104255			67.6	0.012081	1.78713
178	14.92	81.9	58.9	0.104206			72.1	0.013179	1.82788
179	15.0225	79.8	42.9	0.104809			81	0.014437	1.78235
180	15.125	77.3	30.3	0.106898			92.4	0.015682	1.69719
181	15.2275	75.2	23.8	0.109811			102.2	0.016866	1.65029
182	15.33	74	21.2	0.111983			112.9	0.017853	1.58131
183	15.4325	74.1	22.4	0.115545			122.6	0.018638	1.52023
184	15.535	75.1	22.8	0.119736			131.5	0.019096	1.45217
185	15.6375	76.7	21.3	0.124513			141.1	0.019155	1.35755
186	15.74	78	15.8	0.129761			145.8	0.018825	1.29115
187	15.8425	78.4	7.4	0.134436			143.8	0.018075	1.25695
188	15.945	77.7	0.9	0.136363			140.3	0.017062	1.21611
189	16.0475	76.6	-1.2	0.135685			131.4	0.015878	1.20837
190	16.15	76.3	1.9	0.132902			114.8	0.014719	1.28214
191	16.2525	76.7	7.9	0.129239			99.7	0.01369	1.37312
192	16.355	77.4	14	0.126199			90.6	0.012901	1.42395
193	16.4575	78.2	16.4	0.124715			84.8	0.012339	1.45507
194	16.56	79.2	10.5	0.125283			80.5	0.011936	1.48273
195	16.6625	79.3	-0.6	0.127219			77.5	0.011678	1.50684
196	16.765	78.7	-11.2	0.129516			75.3	0.011524	1.53041
197	16.8675	77.4	-17.8	0.131321			73.7	0.011446	1.55305
198	16.97	76.7	-18.6	0.131979			72.7	0.011418	1.57056
199	17.0725	76.3	-15.6	0.131466			71.5	0.01142	1.5972
200	17.175	76.5	-9.3	0.129864			71.2	0.011436	1.60618
201	17.2775	76.5	-2.8	0.127871			71.1	0.01146	1.61181
202	17.38	76.5	4.1	0.126213			69.9	0.011476	1.64177
203	17.4825	76.7	10.1	0.125074			69.2	0.011471	1.65766
204	17.585	77	14.3	0.124609			69.3	0.011433	1.64978
205	17.6875	77.4	15.7	0.124518			68.8	0.011376	1.65349
206	17.79	77.8	14.3	0.12459			67.6	0.011313	1.67352
207	17.8925	78.2	11.1	0.124965			65.7	0.011275	1.71613
208	17.995	78.4	8.4	0.125612			63.5	0.011293	1.77843
209	18.0975	78.2	8.5	0.126345			61.4	0.011367	1.8513
210	18.2	77.9	11.7	0.126648			61	0.01146	1.87869
211	18.4637	77.6	16.2	0.126334			62.9	0.011525	1.83227
212	18.7274	77.5	19.1	0.125475			65.9	0.011525	1.74886
213	18.9912	77.3	18.8	0.124371			68	0.011461	1.68544
214	19.2549	77.4	14.3	0.123374			69.1	0.011357	1.64356
215	19.5186	77.5	5.7	0.123195			68.4	0.011275	1.64839
216	19.7823	77.2	-3.6	0.123985			65.7	0.011278	1.71659
217	20.0461	76.6	-9.6	0.125519			63.5	0.011368	1.79024
218	20.3098	76.2	-11.2	0.127149			64.1	0.011502	1.79438
219	20.5735	76.2	-9.3	0.127815			65.7	0.011648	1.77291
220	20.8372	76.6	-6.3	0.127			67.1	0.01178	1.75559
221	21.101	77.3	-3.8	0.125247			69.2	0.011884	1.71734
222	21.3647	78	-2.1	0.122782			71.5	0.011965	1.67343
223	21.6284	78.5	-0.4	0.120261			71.6	0.012019	1.67863
224	21.8921	78.6	1.4	0.118129			70	0.012051	1.72157
225	22.1559	78.1	1	0.116974			69.5	0.012041	1.73252
226	22.4196	76.6	-3	0.117111			69.9	0.011981	1.71402
227	22.6833	75.5	-8.9	0.118217			69.6	0.011885	1.70761
228	22.947	74.2	-14.6	0.1192			68.7	0.011743	1.70932
229	23.2107	74	-17.6	0.119558			71	0.011468	1.61521
230	23.4745	75.2	-18.1	0.118967			82.4	0.010961	1.33022
231	23.7382	77.3	-15.2	0.117655			93.8	0.010204	1.08785
232	24.0019	80.1	-7.8	0.115181			83.7	0.0092118	1.10057
233	24.2656	82.6	6	0.113128			67.8	0.007996	1.17935
234	24.5294	84.5	33.4	0.112008			57.7	0.0066147	1.1464
235	24.7931	72.5	19.3	0.0937286			79.0909	0.009919	1.25413
236	25.0568	70.5	23.1	0.0950857			75.5294	0.011164	1.4781
237	25.3205	70.1	22.9	0.0966454			74.3	0.011933	1.60606
238	25.5843	70.7	19.7	0.0978056			78.7	0.012334	1.56722
239	25.848	71.4	14.9	0.0996919			80.4	0.012459	1.54963
240	26.1117	72.4	11	0.102966			82.1	0.012354	1.50475
241	26.3754	72.4	7.9	0.107606			84.5	0.012062	1.42746
242	26.6391	72.8	8.1	0.112576			83.5	0.011695	1.4006
243	26.9029	73.2	10.6	0.116554			76.7	0.011342	1.47875
244	27.1666	73.8	14.5	0.118843			68.8	0.011059	1.60741
245	27.4303	74.5	18.4	0.119461			65	0.010824	1.66523
246	27.694	75.4	21.3	0.118387			63.4	0.010635	1.67744
247	27.9578	76.3	22.2	0.116464			62.5	0.010512	1.68192
248	28.2215	77	22.5	0.114054			62.1	0.01044	1.68116
249	28.4852	77.1	22.8	0.111236			61.3	0.010389	1.69478
250	28.7489	76.6	23.7	0.10825			61.4	0.010304	1.67818
251	29.0127	75.6	24.9	0.104935			62.2	0.010157	1.63296
252	29.2764	74.4	25.5	0.101031			62	0.0098907	1.59527
253	29.5401	74.3	25	0.096238			60.9	0.0095415	1.56675
254	29.8038	73.2	26.3	0.0912561			60.4	0.0090249	1.49419
255	30.0676	74.1	26	0.0858907			61.3	0.0083623	1.36416
256	30.3313	75.1	28.2	0.0806186			61.5	0.0076737	1.24776
257	30.595	78.5	31.7	0.0773129			56.8	0.0070775	1.24604
258	30.8587	82.1	43.5	0.0756386			47.5	0.0066332	1.39646
259	31.1224	83.8	80.3	0.076082			38.1	0.0064941	1.70449
260	31.3862	81.3	105.1	0.0780922			32.4	0.0066523	2.05318
261	31.6499	77.9	108.1	0.0806774			31.5	0.0070209	2.22886
262	31.9136	75.8	106.3	0.0823436			35.6	0.007502	2.1073
263	32.1773	74.4	88.6	0.0827473			41.8	0.007968	1.90622
264	32.4411	74.3	65.2	0.0822024			47.6	0.0084378	1.77265
265	32.7048	72	40.6	0.0836242			52.5	0.0089092	1.69699
266	32.9685	68.4	24	0.0886556			55	0.0094196	1.71265
267	33.2322	62.5	7.7	0.0955022			56.5	0.0099067	1.7534
268	33.496	59.7	3.6	0.100614			63.4	0.010251	1.61688
269	33.7597	59.1	3.1	0.101973			77.3	0.010324	1.33558
270	34.0234	60	4.5	0.0998093			88.1	0.010213	1.15925
271	34.2871	61.8	6.6	0.0949906			84.6	0.010057	1.18877
272	34.5509	64.1	8.5	0.0887077			73.7	0.0099721	1.35307
273	34.8146	66.8	9.5	0.0825296			64.8	0.0099743	1.53924
274	35.0783	69.3	9.6	0.076602			60.4	0.010048	1.66358
275	35.342	72	7.1	0.0720489			58.1	0.01019	1.75387
276	35.6154	74.9	-3.6	0.0695673			53.9	0.010381	1.92597
277	35.8902	75	-4.3	0.0689054			51.2	0.010576	2.06562
278	36.165	74.7	-9	0.0697966			50.8	0.010739	2.11398
279	36.4397	73.9	-11.9	0.0716869			50.8	0.01086	2.1378
280	36.7145	73	-13.1	0.0745844			50.7	0.010935	2.1568
281	36.9893	71.9	-12.5	0.0774184			51.4	0.01095	2.13035
282	37.2641	71.5	-11.5	0.0794725			51.8	0.010909	2.10598
283	37.5389	71.6	-10.2	0.0808283			51.3	0.010822	2.10955
284	37.8137	72.1	-9.2	0.0814566			49.9	0.010707	2.14569
285	38.0884	72.7	-8.4	0.081749			49	0.010595	2.16224
286	38.3632	73	-7.6	0.0820805			47.6	0.010513	2.20861
287	38.638	72.9	-6.8	0.0825862			46.3	0.010465	2.26026
288	38.9128	72.4	-5.9	0.0834189			46.2	0.010447	2.26126
289	39.1876	72.1	-4.3	0.0844324			47	0.010437	2.22064
290	39.4623	72	-2.1	0.0855618			48	0.010424	2.17167
291	39.7371	72	0.9	0.0867139			48.5	0.0104	2.14433
292	40.0119	72	4.6	0.0875499			48.5	0.010348	2.13361
293	40.2867	72.5	9.3	0.0880024			48.9	0.010252	2.09652
294	40.5615	72.1	12.3	0.0878002			49.2	0.010119	2.05671
295	40.8362	72.3	14.3	0.0867389			48.7	0.0099603	2.04524
296	41.111	72.1	14.4	0.0848197			47.6	0.0098187	2.06275
297	41.3858	71.6	12.3	0.0821599			46.3	0.0097483	2.10546
298	41.6606	72.9	10.7	0.0787843			44.9	0.0097695	2.17584
299	41.9354	73.5	7.6	0.0751928			43.9	0.0098658	2.24733
300	42.2102	75	5.8	0.071919			44.9	0.0099983	2.22679
301	42.4849	75.6	4.1	0.0697062			47.9	0.010125	2.11378
302	42.7597	75.2	4	0.0684811			50.8	0.010213	2.01043
303	43.0345	74.7	5	0.0682571			51.9	0.010259	1.97669
304	43.3093	74.6	7.6	0.0681611			52.1	0.010301	1.97716
305	43.5841	73.6	7.6	0.0676175			51.5	0.010368	2.0132
306	43.8588	73.9	9.9	0.0669773			51.7	0.010457	2.02263
307	44.1336	73.7	7.4	0.0668952			54.8	0.01054	1.92336
308	44.4084	74.3	7	0.0671474			55.2	0.01061	1.9221
309	44.6832	75.1	6.7	0.0677628			51.9	0.010679	2.05761
310	44.958	75.7	6	0.0684086			50.3	0.010765	2.14016
311	45.2327	76.1	5.2	0.069662			49.9	0.01086	2.17635
312	45.5075	76.1	4.6	0.0714001			49.9	0.010947	2.19379
313	45.7823	75.8	4.7	0.0737887			50.2	0.010987	2.18865
314	46.0571	75.5	5.5	0.0766441			51.9	0.010961	2.11195
315	46.3319	75.2	6.1	0.0797493			53.9	0.010886	2.01967
316	46.6067	75	5.8	0.0828663			54.9	0.01079	1.96539
317	46.8814	74.9	4.8	0.0860987			54.7	0.010708	1.95759
318	47.1562	75	3.3	0.089272			53.4	0.010677	1.99944
319	47.431	75.1	1.5	0.0919347			52.3	0.010722	2.0501
320	47.7058	75.4	-0.2	0.0941801			51	0.010861	2.12961
321	47.9806	75.6	-2	0.0956998			49.8	0.011066	2.22209
322	48.2553	75.8	-1.5	0.0968192			49.7	0.011286	2.27082
323	48.5301	75.9	-0.5	0.0974257			50	0.011529	2.3058
324	48.8049	75.7	1.7	0.097657			49.8	0.011762	2.36185
325	49.0797	75.4	4.2	0.0975439			50.6	0.011984	2.36838
326	49.3545	75	6.2	0.097471			51.9	0.012189	2.34855
327	49.6292	75	8.1	0.097129			52.6	0.012327	2.34354
328	49.904	75	7.9	0.0965536			53.4	0.012399	2.32191
329	50.1788	75.1	5.9	0.0958049			54.7	0.012415	2.26965
330	50.4536	75	3	0.0950872			55.8	0.012387	2.21989
331	50.7284	74.7	0.5	0.0948857			57.2	0.012322	2.1542
332	51.0032	74.2	-0.3	0.0952066			59.5	0.012228	2.05513
333	51.2779	73.8	0.1	0.0965447			60.3	0.012113	2.00879
334	51.5527	73.5	-0.2	0.0991062			59.8	0.011976	2.00268
335	51.8275	73.4	-0.2	0.102718			61.2	0.011826	1.93235
336	52.1023	73.3	-0.9	0.106674			63.1	0.011668	1.84913
337	52.3771	73.2	-1.5	0.109747			62.5	0.011548	1.84768
338	52.6518	73	-3.9	0.11207			58.1	0.011467	1.97367
339	52.9266	73.1	-5.5	0.113329			53.1	0.011419	2.15047
340	53.2014	73.5	-7.8	0.114101			50	0.011385	2.277
341	53.4762	74.4	-9.8	0.114954			48.8	0.011354	2.32664
342	53.751	75.6	-10.7	0.116096			49.1	0.011332	2.30794
343	54.0257	76.7	-10.3	0.117654			49.8	0.011322	2.27349
344	54.3005	77.4	-8.1	0.119444			49.5	0.01132	2.28687
345	54.5753	77.6	-5	0.121395			49.7	0.011307	2.27505
346	54.8501	77.6	-2.3	0.123181			50.9	0.011274	2.21493
347	55.1249	77.5	-0.6	0.124621			51.7	0.011218	2.16983
348	55.3997	77.5	0.2	0.125747			52	0.011144	2.14308
349	55.6744	77.6	0.4	0.12662			52.1	0.011058	2.12246
350	55.9492	78	0.7	0.127174			52.6	0.010977	2.08688
351	56.224	78.3	1.4	0.12741			53.6	0.010908	2.03507
352	56.4988	76.8	2.7	0.126775			54.4	0.010845	1.99357
353	56.7736	78.8	4.4	0.125406			56.2	0.01079	1.91993
354	57.0483	78.9	6.7	0.12314			56.3	0.010742	1.90799
355	57.3231	78.6	8.5	0.120702			54.5	0.010707	1.96459
356	57.5979	78.2	9.2	0.118041			53.9	0.010681	1.98163
357	57.8727	78	8.4	0.115498			54.1	0.010663	1.97098
358	58.1475	77.7	5.2	0.113472			54.6	0.010643	1.94927
359	58.4222	77	0.9	0.112109			55.4	0.010609	1.91498
360	58.697	76.8	-4.2	0.111321			56.5	0.010555	1.86814
361	58.9718	76.3	-8.1	0.11071			57.9	0.010488	1.8114
362	59.2466	76.3	-10.2	0.11058			59	0.010426	1.76712
363	59.5214	76.4	-10.5	0.110897			60	0.01038	1.73
364	59.7962	76.1	-9.5	0.111566			60.8	0.010369	1.70543
365	60.0709	76	-8.3	0.112599			61.1	0.010379	1.69869
366	60.3457	76	-7.6	0.113246			61.5	0.010381	1.68797
367	60.6205	76.2	-7.4	0.113187			61.7	0.010365	1.6799
368	60.8953	76.7	-7.5	0.112238			61.6	0.010347	1.67971
369	61.1701	77.2	-7.1	0.111023			61	0.01034	1.69508
370	61.4448	77.6	-5.4	0.109805			60.5	0.010334	1.7081
371	61.7196	77.8	-2.3	0.109175			61	0.010305	1.68934
372	61.9944	78	1.5	0.108865			62.2	0.010239	1.64614
373	62.2692	77.8	4.7	0.108456			62.7	0.010126	1.61499
374	62.544	77.7	6.2	0.106948			61.9	0.010003	1.61599
375	62.8187	77.5	5.9	0.103881			60.3	0.0098849	1.63929
376	63.0935	80	14.9	0.0996049			58.3	0.0097693	1.67569
377	63.3683	79.7	17.1	0.0948944			56.7	0.0096354	1.69937
378	63.6431	78.7	18.4	0.0911515			56.9	0.0094141	1.6545
379	63.9179	77.4	20.8	0.0871841			59.4	0.0090147	1.51763
380	64.1927	74.9	18.1	0.0833898			61.7	0.0084096	1.36298
381	64.4674	76	30.6	0.0785908			62	0.0075058	1.21061
382	64.7422	77.3	50.9	0.0734754			60.7	0.0062417	1.02829
383	65.017	77.1	81.4	0.0705888			58.5	0.004816	0.823248
384	65.2918	76.5	107.2	0.0677548			63.0588	0.0033552	0.532075
385	65.5666	83.2	-16.8	0.108319			59.0909	0.0088011	1.48942
386	65.8413	80.2	-7.7	0.110189			62.5882	0.0102	1.6297
387	66.1161	78.4	-4.6	0.112902			62.6	0.011162	1.78307
388	66.3909	75.6	-5.8	0.114669			64.9	0.011811	1.81988
389	66.6657	76.3	-0.1	0.116336			64.7	0.012206	1.88655
390	66.9405	75.4	2.6	0.117658			63.5	0.012434	1.95811
391	67.2152	74.1	4.2	0.118815			61.8	0.01255	2.03074
392	67.49	72.8	3.5	0.119573			60.4	0.012608	2.08742
393	67.7648	72	1.9	0.120186			59.5	0.012637	2.12387
394	68.0396	72.8	-3	0.120761			59.1	0.012659	2.14196
395	68.3144	73.9	-4.8	0.1215			58.9	0.012693	2.15501
396	68.5892	75	-6.4	0.122382			58.6	0.01274	2.17406
397	68.8639	75.2	-5.7	0.123561			58.5	0.012791	2.1865
398	69.1387	75.6	-5.8	0.125462			58.7	0.012822	2.18433
399	69.4135	75.5	-4.9	0.128522			59.4	0.012828	2.1596
400	69.6883	74.9	-3.3	0.132657			60.9	0.0128	2.10181
401	69.9631	74.3	-1.5	0.136121			62.9	0.012736	2.0248
402	70.2378	73.5	-0.3	0.138197			65.5	0.012633	1.9287
403	70.5126	73.5	0.8	0.137696			65.3	0.012517	1.91685
404	70.7874	74.3	1.8	0.135356			62.7	0.012397	1.97719
405	71.0622	74.7	2.2	0.131582			60.9	0.01229	2.01806
406	71.337	75.2	1.9	0.126948			60.5	0.012166	2.01091
407	71.6937	75.8	0.3	0.120472			60.2	0.012032	1.99867
408	72.0563	76.2	-1	0.115152			57.4	0.011899	2.073
409	72.4189	76.6	-2.1	0.110069			52.2	0.011809	2.26226
410	72.7815	77	-2.5	0.105593			47.5	0.011762	2.47621
411	73.144	77	-2.5	0.101903			45.4	0.01176	2.59031
412	73.5066	76.7	-2.3	0.0991053			44.4	0.011781	2.65338
413	73.8692	76.4	-1.5	0.0971772			42.8	0.011783	2.75304
414	74.2318	76.3	0	0.0958888			40.5	0.011733	2.89704
415	74.5944	76.3	1.7	0.09494			38.4	0.011619	3.02578
416	74.9569	76.4	2.3	0.0940876			37.9	0.011477	3.02823
417	75.3195	76.6	0.3	0.0931163			38.5	0.011341	2.94571
418	75.6821	76.6	-4.4	0.0921624			37.9	0.011241	2.96596
419	76.0447	76.4	-9.8	0.0915528			36.2	0.011171	3.08591
420	76.4073	76.5	-14.8	0.0905429			34.6	0.011139	3.21936
421	76.7698	77	-15.4	0.0891617			33.5	0.01114	3.32537
422	77.1324	77	-15.4	0.0874193			32.8	0.011174	3.40671
423	77.495	77.1	-14.5	0.0856819			32.2	0.011257	3.49596
424	77.8576	77	-13	0.0840372			31.8	0.011384	3.57987
425	78.2202	76.9	-10.3	0.0824821			32.2	0.011496	3.57019
426	78.5828	76.9	-5.8	0.0808119			33	0.01156	3.50303
427	78.9453	76.8	-0.5	0.0789651			32.9	0.011544	3.50881
428	79.3079	76.6	3.5	0.0772233			32	0.011476	3.58625
429	79.6705	76.4	4	0.07571			31.2	0.011372	3.64487
430	80.0331	76.5	-0.5	0.0745929			31.1	0.011235	3.61254
431	80.3957	77	-9.1	0.0739083			31	0.011091	3.57774
432	80.7582	77.9	-20	0.0731028			30.4	0.010976	3.61053
433	81.1208	78.9	-30.6	0.0717419			29.3	0.010875	3.7116
434	81.4834	80	-38.4	0.0697969			29.2	0.010719	3.67089
435	81.846	80.8	-40.4	0.0670861			29.4	0.010508	3.57415
436	82.2086	80.9	-35.9	0.0642304			28.3	0.010293	3.6371
437	82.5711	80.3	-28.3	0.0614822			27.1	0.010093	3.72435
438	82.9337	79.3	-20.7	0.0598411			26.1	0.009958	3.81533
439	83.2963	78.1	-12.3	0.0600641			26.3	0.0098833	3.75791
440	83.6589	76.3	-3.9	0.062662			27.1	0.0098653	3.64033
441	84.0215	73.9	3.7	0.0671956			27.7	0.0098966	3.57278
442	84.384	71.4	8.9	0.072878			27.8	0.0099753	3.58824
443	84.7466	70.2	11.6	0.0779567			26.9	0.010096	3.75316
444	85.1092	70.9	12	0.0814378			27.6	0.010237	3.70906
445	85.4718	73.3	9.4	0.0847507			29.9	0.010388	3.47425
446	85.8344	76.1	3.4	0.0889908			30.6	0.010532	3.44183
447	86.1969	78.1	-5.7	0.0950737			30.6	0.010664	3.48497
448	86.5595	79.1	-13.1	0.101403			31.4	0.010815	3.44427
449	86.9221	79.5	-15.9	0.106483			31.8	0.011	3.45912
450	87.2847	79.2	-15.1	0.109601			31.7	0.011215	3.53785
451	87.6473	78.8	-12.2	0.111194			32	0.011454	3.57938
452	88.0099	78.1	-9	0.111061			32.8	0.011683	3.56189
453	88.3724	77.4	-6.3	0.110011			33.4	0.011886	3.55868
454	88.735	76.6	-4.6	0.109095			34.3	0.012039	3.50991
455	89.0976	76.1	-3.1	0.107817			35.3	0.012138	3.43853
456	89.4602	75.6	-0.9	0.106098			35.5	0.012173	3.42901
457	89.8228	75.3	2.9	0.103735			36	0.012156	3.37667
458	90.1853	75	7.9	0.101315			36	0.012103	3.36194
459	90.5479	74.6	13.3	0.0992374			35.5	0.012034	3.38986
460	90.9105	74.3	16.6	0.0978811			35.4	0.011962	3.3791
461	91.2731	74.2	16.6	0.096966			35.5	0.011893	3.35014
462	91.5593	74.4	13.9	0.0965041			35.6	0.011823	3.32107
463	91.799	74.7	9.2	0.0962123			35.6	0.011741	3.29803
464	92.0386	75.5	4.1	0.0957474			35.1	0.011652	3.31966
465	92.2783	76.2	-0.3	0.0950659			34.2	0.011546	3.37602
466	92.5179	76.8	-3.9	0.0940747			33.6	0.011413	3.39673
467	92.7576	77	-6.8	0.0926469			33.1	0.011254	3.4
468	92.9972	77.6	-9.4	0.0906453			32.2	0.011112	3.45093
469	93.2368	77.1	-10.7	0.0881762			31.3	0.011012	3.51821
470	93.4765	75.4	-9.3	0.0853596			30.5	0.010944	3.5882
471	93.7161	74.8	-9.4	0.0817487			30.9	0.010892	3.52492
472	93.9558	74.4	-10.9	0.0779463			31.7	0.01085	3.42271
473	94.1954	74.4	-13	0.0751245			31.6	0.010845	3.43196
474	94.4351	74.9	-13.4	0.0742418			30.9	0.010885	3.52265
475	94.6747	75.5	-9.7	0.0751135			30.7	0.010964	3.57134
476	94.9144	75.5	-2.4	0.0766305			31.8	0.011063	3.47893
477	95.154	75.1	5.9	0.0776692			33.1	0.011171	3.37492
478	95.3937	74.4	11.8	0.0780012			33.5	0.011292	3.37075
479	95.6333	74	13.9	0.0777879			33	0.011429	3.46333
480	95.873	73.7	12.7	0.0771647			32.9	0.011563	3.51459
481	96.1126	74.2	10.3	0.0761935			33.5	0.011685	3.48806
482	96.3523	74.6	7.1	0.0749863			34.6	0.011768	3.40116
483	96.5919	75.3	5.1	0.0737384			35	0.011803	3.37229
484	96.8315	76.2	5	0.0723257			35.3	0.011802	3.34334
485	97.0712	77.1	6.7	0.0706869			34.8	0.011775	3.38362
486	97.3108	77.5	9.3	0.0691683			33.9	0.011738	3.46254
487	97.5505	78	11.8	0.0676833			33.1	0.011714	3.53897
488	97.7901	77.9	13.3	0.066196			32.6	0.011708	3.59141
489	98.0298	77.9	12.1	0.0645195			32.7	0.011697	3.57706
490	98.2694	76.7	6.1	0.0626637			33.5	0.011656	3.4794
491	98.5091	78	-1.5	0.0608482			34.1	0.011596	3.40059
492	98.7487	77.4	-12.4	0.0595345			33.8	0.011556	3.41893
493	98.9884	76.6	-20.6	0.0589786			33	0.011546	3.49879
494	99.228	76	-25	0.0587396			32.8	0.011549	3.52104
495	99.4677	76.3	-26.1	0.0582638			34	0.011526	3.39
496	99.7073	77.1	-25.1	0.0574044			34.9	0.011471	3.28682
497	99.947	77.8	-22.9	0.0566084			34.9	0.011402	3.26705
498	100.187	78.3	-20.1	0.0561989			34.8	0.011335	3.25718
499	100.426	78.1	-16.5	0.0567343			34.8	0.011278	3.2408
500	100.666	77.8	-11.9	0.0577811			34.9	0.011235	3.2192
501	100.906	77.5	-6	0.0585532			34.1	0.011201	3.28475
502	101.145	77.3	1	0.0588318			33.5	0.011154	3.32955
503	101.385	77.2	8	0.05864			33.3	0.01108	3.32733
504	101.624	77.2	10.3	0.0582052			33.5	0.010969	3.27433
505	101.864	77.2	9.6	0.0579303			34.9	0.010844	3.10716
506	102.104	77.5	2.8	0.0578239			36.3	0.010742	2.95923
507	102.343	77.8	-6.9	0.0582381			37.9	0.010692	2.82111
508	102.583	77.8	-15.2	0.0588942			38.2	0.010687	2.79764
509	102.823	77.7	-19.3	0.0593651			36	0.010683	2.9675
510	103.062	77.8	-20.2	0.0596555			35.2	0.010646	3.02443
511	103.302	78.2	-18.7	0.0598633			35.5	0.010579	2.98
512	103.542	77.8	-19	0.0603759			35	0.010506	3.00171
513	103.781	78.1	-16	0.0619253			33.8	0.010449	3.09142
514	104.021	77.7	-12.2	0.0641763			32.3	0.010423	3.22693
515	104.261	77	-6.5	0.0670958			31.5	0.010422	3.30857
516	104.5	76.3	-0.1	0.0698705			31.2	0.010445	3.34776
517	104.74	75.9	6.2	0.0724543			31.1	0.010501	3.37653
518	104.98	76.3	11.8	0.0746443			31.2	0.010576	3.38974
519	105.219	77	18.3	0.0768485			32	0.010684	3.33875
520	105.459	78.5	23.8	0.0787233			32.9	0.010787	3.27872
521	105.698	79.7	26.3	0.0804056			34.1	0.010885	3.19208
522	105.938	80.6	20.5	0.0820812			36.1	0.010958	3.03546
523	106.237	79.1	9.1	0.0840031			39.4	0.010988	2.78883
524	106.616	78.3	0.9	0.0861633			42.8	0.010967	2.56238
525	106.996	78.3	-6.3	0.0881856			44.1	0.010884	2.46803
526	107.375	77.2	-3.3	0.0899119			44	0.010743	2.44159
527	107.754	76.9	-1	0.0913518			44.2	0.010522	2.38054
528	108.134	76.4	5.7	0.0927573			44.7	0.010162	2.27338
529	108.513	76.2	12.6	0.094203			44.9	0.0096321	2.14523
530	108.892	76.1	20.7	0.0951463			45.2	0.008783	1.94314
531	109.272	77.3	30.8	0.0947448			44.9	0.007654	1.70468
532	109.651	77.5	45.4	0.095286			43	0.0063024	1.46567
533	110.03	77.8	64.7	0.0937922			38.7	0.0047763	1.23419
534	110.41	77.2	87	0.0927948			37.8824	0.0033102	0.873811
535	110.789	68.7	-12.6	0.0737612			52.3636	0.0086629	1.65437
536	111.168	68.4	-12.6	0.0722991			51.8824	0.0098001	1.88891
537	111.548	68.2	-13.7	0.0707857			50.1	0.010512	2.0982
538	111.927	67.5	-14	0.0693736			50.5	0.01093	2.16436
539	112.306	66.4	-12.7	0.0682958			48.4	0.011155	2.30475
540	112.686	65.7	-10.8	0.0678096			46.1	0.01124	2.43818
541	113.065	65.8	-9.9	0.0679639			45.2	0.011218	2.48186
542	113.444	66.7	-11.5	0.0691207			47.4	0.011103	2.34241
543	113.824	68.7	-10.9	0.0713636			48.4	0.010996	2.2719
544	114.203	70.8	-13.2	0.0745319			43.5	0.011001	2.52897
545	114.582	73.7	-14.1	0.0781254			37	0.011127	3.0073
546	114.962	76.4	-8.3	0.0811304			39.8	0.011194	2.81256
547	115.341	77.8	-4.9	0.0828609			57	0.011	1.92982
548	115.72	78.1	-2.9	0.0833241			88.2	0.010453	1.18515
549	116.1	76.6	2	0.0830973			93.3	0.0098032	1.05072
550	116.355	74.8	2.7	0.0822934			56.5	0.0091821	1.62515
551	116.491	73	3.8	0.0817895			30.2	0.0086684	2.87033
552	116.627	70.8	3.4	0.0811459			20.6	0.008314	4.03592
553	116.763	69.1	0.4	0.0804644			17.6	0.0080325	4.56392
554	116.899	67.9	-2.7	0.0801806			16.4	0.0078516	4.78756
555	117.035	67.1	-5.7	0.0798642			15.4	0.0077508	5.03299
556	117.171	66.9	-8.7	0.0796154			15	0.0076734	5.1156
557	117.306	67.6	-11.5	0.0790324			15.3	0.0075814	4.95516
558	117.442	69	-14.1	0.0786419			15.8	0.0074657	4.72513
559	117.578	70.5	-16.1	0.0784121			15.8	0.007338	4.6443
560	117.714	71.7	-17.2	0.0781275			14.2	0.0072286	5.09056
561	117.85	72.4	-16.5	0.0779849			12.3	0.0071362	5.80179
562	117.986	72.5	-14.7	0.0781197			11.4	0.0070692	6.20105
563	118.122	72.2	-13.5	0.0792883			11	0.0070242	6.38564
564	118.258	71.7	-13.8	0.0814641			11.1	0.0069986	6.30505
565	118.394	71.2	-15.5	0.0850763			11.6	0.0069852	6.02172
566	118.53	70.8	-17.4	0.0901581			12.2	0.0069719	5.71467
567	118.665	70.3	-18.2	0.0960363			12.3	0.0069524	5.65236
568	118.801	70.6	-17.2	0.102117			12	0.0069226	5.76883
569	118.937	71.1	-14.9	0.106571			11.8	0.0068893	5.83839
570	119.073	71.8	-11.9	0.110026			11.9	0.006856	5.76134
571	119.209	71.6	-11.1	0.111922			12	0.0068266	5.68883
572	119.345	71.2	-11.5	0.113047			11.6	0.0068059	5.86716
573	119.481	70.7	-13.1	0.114054			10.6	0.0067991	6.41425
574	119.617	70	-14.4	0.114617			9.9	0.0068145	6.88333
575	119.753	69.5	-15.2	0.114317			9.5	0.0068522	7.21284
576	119.889	69.1	-15.2	0.112824			9.2	0.0068989	7.4988
577	120.024	68.9	-14.6	0.11032			9.3	0.0069495	7.47258
578	120.16	68.9	-13.8	0.107507			9.8	0.0069872	7.1298
579	120.296	68.9	-13	0.105105			10.4	0.0070141	6.74433
580	120.432	69.2	-12.2	0.102852			10.5	0.0070282	6.69352
581	120.568	69.2	-11.7	0.100738			10.4	0.0070325	6.76202
582	120.704	69.3	-11.4	0.0985069			10.4	0.0070237	6.75356
583	120.84	69.5	-11	0.0957241			10.4	0.0070067	6.73721
584	120.976	69.8	-10.7	0.0921837			10.2	0.0069916	6.85451
585	121.112	69.8	-10.8	0.0877483			10	0.0069902	6.9902
586	121.247	69.3	-11.8	0.0830882			9.9	0.007006	7.07677
587	121.383	69.1	-12.4	0.0790196			9.9	0.0070389	7.11
588	121.519	68.4	-13.2	0.0758693			10	0.007086	7.086
589	121.655	67.6	-13.7	0.0741697			10.2	0.0071391	6.99912
590	121.791	67.7	-12.9	0.0728309			10.4	0.0071863	6.9099
591	121.927	68.2	-12.1	0.0719803			10.7	0.007211	6.73925
592	122.063	68.8	-12	0.0712397			10.9	0.0072177	6.62174
593	122.199	69.8	-12.6	0.0705576			10.8	0.00722	6.68519
594	122.335	71.4	-12.5	0.0698627			10.6	0.0072306	6.82132
595	122.471	71.2	-17.2	0.0692174			10.3	0.0072615	7.05
596	122.606	71.3	-21.1	0.0687553			10.1	0.0073103	7.23792
597	122.742	71.1	-24.2	0.0683903			10.3	0.0073734	7.15864
598	122.878	71.3	-25.8	0.0678871			10.5	0.0074341	7.0801
599	123.014	71.5	-26	0.0669846			10.8	0.0074979	6.9425
600	123.15	71.8	-25.3	0.065767			10.9	0.0075528	6.92917
601	123.286	71.9	-23.7	0.0647244			11.1	0.0076063	6.85252
602	123.422	71.8	-21.4	0.0641805			11.3	0.0076549	6.77425
603	123.558	71.7	-18.5	0.06391			11.6	0.0077123	6.64853
604	123.694	71.6	-15.1	0.0635162			11.7	0.0077938	6.66137
605	123.829	71.5	-11.2	0.0629258			11.5	0.0078938	6.86417
606	123.965	71.4	-7.6	0.0624509			11.6	0.0080211	6.91474
607	124.101	71.9	-4.6	0.0625957			11.8	0.0081677	6.92178
608	124.237	72.6	-4.9	0.0636062			12.3	0.0083223	6.7661
609	124.373	71.8	-9.8	0.0656295			13.1	0.0084849	6.47702
610	124.509	73.1	-14	0.0683703			14.2	0.00869	6.11972
611	124.645	72.2	-20.4	0.0722451			15.5	0.0089372	5.76594
612	124.781	71.8	-24.4	0.0763321			15.9	0.0092446	5.81421
613	124.917	71.3	-25.8	0.0806374			16	0.0095604	5.97525
614	125.053	70.7	-25.2	0.0849362			16.8	0.0098432	5.85905
615	125.188	70.4	-22.9	0.088342			18.2	0.010053	5.52363
616	125.324	70.2	-19.6	0.090705			19.5	0.010205	5.23333
617	125.46	70	-16.1	0.092281			20	0.010307	5.1535
618	125.596	69.9	-13.1	0.0930619			19.8	0.010375	5.2399
619	125.732	69.7	-11.2	0.0931186			19.8	0.010421	5.26313
620	125.868	69.5	-10.4	0.0926736			19.8	0.010458	5.28182
621	126.004	69.1	-10.5	0.0923451			20	0.010471	5.2355
622	126.14	68.7	-11	0.0922658			20.8	0.010449	5.02356
623	126.276	68.4	-11.7	0.0920699			21.6	0.010394	4.81204
624	126.412	68	-12.5	0.0916139			22.3	0.010316	4.62601
625	126.547	68	-12.6	0.0905803			22.8	0.010251	4.49605
626	126.683	68.2	-12.3	0.0890891			23.1	0.0102	4.41558
627	126.819	68.4	-11.7	0.0873894			22.7	0.010142	4.46784
628	126.955	69.4	-10.7	0.0854531			22.5	0.010049	4.46622
629	127.091	69.5	-10.4	0.0828237			22.5	0.0099314	4.41396
630	127.227	70.5	-9.6	0.0801216			22.5	0.0097834	4.34818
631	127.363	70.5	-9.7	0.0783405			22.7	0.0096498	4.25101
632	127.499	70.4	-9.2	0.0783347			22.8	0.0095656	4.19544
633	127.635	69.6	-8.4	0.0804171			22.4	0.0095919	4.2821
634	127.77	68.7	-7.6	0.0842602			21.5	0.0097484	4.53414
635	127.906	67.8	-7.3	0.0887847			21.1	0.010004	4.74123
636	128.042	67.3	-7.8	0.0933199			21.9	0.010277	4.69269
637	128.178	67.3	-8.9	0.0973594			23.2	0.010572	4.5569
638	128.314	67.7	-10.6	0.100245			24.2	0.010869	4.49132
639	128.45	68.3	-12.4	0.10178			24.8	0.011152	4.49677
640	128.586	68.9	-13.7	0.101812			25.8	0.01138	4.41085
641	128.722	69.8	-14	0.100623			27	0.011524	4.26815
642	128.858	70.1	-14.1	0.0982799			28	0.011576	4.13429
643	128.994	70.7	-14.3	0.0948683			28.6	0.011543	4.03601
644	129.129	71.6	-15.5	0.0907271			29.6	0.011428	3.86081
645	129.265	71.5	-18	0.0871756			30.1	0.01132	3.7608
646	129.401	71.1	-20.6	0.0842503			29.7	0.01125	3.78788
647	129.537	69.6	-21.3	0.0821141			28.9	0.01124	3.88927
648	129.673	67.2	-19.6	0.0809109			28.4	0.011289	3.975
649	129.809	63.8	-16.4	0.0803446			28.2	0.011378	4.03475
650	129.945	58.4	-8	0.080562			28.5	0.011501	4.03544
651	130.081	55.6	-5.6	0.0814112			29.3	0.011649	3.97577
652	130.217	56.1	-5.4	0.0830935			30.3	0.011791	3.89142
653	130.353	59.3	-7.1	0.0848769			31.5	0.011891	3.77492
654	130.488	63.1	-10.6	0.087081			32.8	0.011933	3.63811
655	130.624	65.7	-14.5	0.0892471			34	0.011905	3.50147
656	130.76	67.2	-17.5	0.0909856			35.2	0.011816	3.35682
657	130.896	67.3	-20.2	0.091872			36.4	0.011674	3.20714
658	131.032	67.2	-22.3	0.0922348			37.7	0.011506	3.05199
659	131.168	68.4	-22.3	0.0921592			39.9	0.011399	2.85689
660	131.304	69.3	-20.7	0.0917505			40.3	0.011403	2.82953
661	131.44	69.3	-18.2	0.0916719			38	0.011487	3.02289
662	131.576	69.7	-16	0.0920189			36.8	0.011583	3.14755
663	131.711	69.6	-14.9	0.0938276			37.8	0.01166	3.08466
664	131.847	69.7	-15.3	0.0966776			38.9	0.011681	3.00283
665	131.983	70.5	-15.9	0.0998155			40.7	0.011654	2.86339
666	132.119	70.9	-17	0.102501			42.7	0.011614	2.71991
667	132.255	71.2	-19.6	0.104437			43.9	0.011595	2.64123
668	132.391	72	-21.8	0.106226			44.8	0.011625	2.59487
669	132.527	72.9	-23.3	0.109385			46.1	0.011728	2.54403
670	132.663	72.7	-22.7	0.114511			47.7	0.011905	2.49581
671	132.8	72.1	-21.3	0.12026			49.8	0.012123	2.43434
672	133.057	70.8	-19.8	0.12451			54.9	0.012319	2.2439
673	133.314	69.3	-19.1	0.126467			64.4	0.012524	1.94472
674	133.571	67.8	-19.8	0.126566			73	0.012763	1.74836
675	133.828	67	-19.5	0.125074			77.5	0.013014	1.67923
676	134.085	66	-19.7	0.122981			80.5	0.013265	1.64783
677	134.343	65.9	-18.3	0.1204			84.2	0.013486	1.60166
678	134.6	66.3	-16.5	0.118148			85.9	0.013603	1.58359
679	134.857	66.4	-15.1	0.116102			87.2	0.013546	1.55344
680	135.114	66.9	-13.3	0.114309			90.2	0.013144	1.45721
681	135.371	68	-10.3	0.111614			94.6	0.01223	1.29281
682	135.628	69.6	-6.8	0.106987			97.6	0.010744	1.10082
683	135.885	72.2	-2.6	0.104009			99.1	0.0087065	0.878557
684	136.143	75.7	-7.4	0.145416			22.9	0.0079346	3.46489
685	136.4	73.9	0	0.142305			48.4	0.0098805	2.04143
686	136.657	72.9	5.7	0.138873			68.6	0.011447	1.66866
687	136.914	72.3	11.7	0.135758			76.7	0.012502	1.62999
688	137.171	72.3	19.1	0.131845			80.2	0.013219	1.64825
689	137.428	72.4	27.4	0.126304			81.2	0.013696	1.6867
690	137.685	72.4	34.9	0.119952			82.5	0.01402	1.69939
691	137.942	72.5	39.8	0.113893			84.8	0.014233	1.67842
692	138.2	72.6	41.3	0.108717			86.9	0.014377	1.65443
693	138.457	72.5	40.4	0.105412			89.4	0.014475	1.61913
694	138.714	71.9	37.2	0.103741			93.4	0.014503	1.55278
695	138.971	71.2	35.4	0.102898			95.3	0.014457	1.517
696	139.228	71.1	35.7	0.10225			93.5	0.014322	1.53176
697	139.485	71.7	38.2	0.100998			90.4	0.014111	1.56095
698	139.742	72.6	42	0.0990498			87.4	0.013855	1.58524
699	140	73.5	45.3	0.0973865			83.5	0.013614	1.63042
700	140.257	73.7	45	0.0969792			80.1	0.013409	1.67403
701	140.514	73.8	40.2	0.0976467			79.1	0.013251	1.67522
702	140.771	73.8	33.7	0.099144			79.3	0.013143	1.65738
703	141.028	73.2	21.3	0.101176			79.2	0.013045	1.6471
704	141.285	72.8	10.7	0.103969			78.3	0.012941	1.65275
705	141.542	72.6	4.2	0.107065			76.8	0.012808	1.66771
706	141.799	73	3.5	0.110462			74.3	0.012645	1.70188
707	142.057	73.3	7.6	0.113804			70.7	0.012494	1.76719
708	142.314	73.3	14.9	0.116883			67.5	0.012403	1.83748
709	142.571	72.6	20.6	0.119036			66.6	0.012367	1.85691
710	142.828	71.7	22.8	0.119893			67.2	0.012365	1.84003
711	143.085	71.3	22.7	0.118731			68	0.01237	1.81912
712	143.342	71.5	20.2	0.11582			69.3	0.012364	1.78413
713	143.599	72.6	17.6	0.112451			70	0.012348	1.764
714	143.856	73.9	15.6	0.109557			69.3	0.012339	1.78052
715	144.114	74.5	15.2	0.107622			68.1	0.012357	1.81454
716	144.371	74.3	16.4	0.106648			67.3	0.012417	1.84502
717	144.628	73.4	18.3	0.106133			68.2	0.01253	1.83724
718	144.885	72.9	20.4	0.105581			71.1	0.012683	1.78383
719	145.142	72.5	21.3	0.104811			73.3	0.012867	1.75539
720	145.399	72.4	21.2	0.104233			74.2	0.013041	1.75755
721	145.656	72.2	19.3	0.104057			76.5	0.013202	1.72575
722	145.914	71.7	15.6	0.104734			79.1	0.013351	1.68786
723	146.171	71.3	11.9	0.105702			80.6	0.01347	1.67122
724	146.428	71.3	9.5	0.106825			81.5	0.013559	1.66368
725	146.685	71.3	9.4	0.107562			81.2	0.013625	1.67796
726	146.942	72.4	12	0.107556			79.8	0.013691	1.71566
727	147.199	74.3	31.1	0.107573			79.1	0.013743	1.73742
728	147.456	74	38.8	0.107641			79.5	0.01373	1.72704
729	147.713	73.9	36.7	0.108033			79.5	0.013608	1.7117
730	147.971	74	30.5	0.108567			78.8	0.013414	1.70228
731	148.228	74.1	23.1	0.109349			77.6	0.013225	1.70425
732	148.485	74.3	9.7	0.11047			77.6	0.013077	1.68518
733	148.742	74	6.3	0.112121			79.8	0.012953	1.62318
734	148.999	73.6	8.6	0.114035			80.4	0.01284	1.59701
735	149.256	73.5	11.5	0.115362			78.7	0.012742	1.61906
736	149.513	73.9	14.5	0.115611			76	0.012666	1.66658
737	149.77	74.7	17.1	0.114833			75.6	0.012598	1.6664
738	150.028	75.7	18.7	0.113986			75.3	0.01256	1.66799
739	150.285	76.6	18.4	0.113428			75.9	0.012542	1.65244
740	150.542	77.4	19.7	0.11334			76.6	0.012541	1.63721
741	150.799	78	19.6	0.113437			76.2	0.012548	1.64672
742	151.056	78.5	21.6	0.113552			75.4	0.012552	1.66472
743	151.313	78.4	25	0.113713			75.5	0.012556	1.66305
744	151.57	78	28.2	0.113988			77.2	0.012557	1.62655
745	151.828	77.4	30.3	0.114356			79.2	0.012553	1.58497
746	152.085	76.7	31.9	0.114804			81.6	0.012542	1.53701
747	152.342	76.7	34	0.115506			85.8	0.012518	1.45897
748	152.599	77.3	35.8	0.116324			89	0.012488	1.40315
749	152.856	77.6	39.7	0.117513			90.4	0.012445	1.37666
750	153.113	78.2	42.2	0.119079			93.8	0.01241	1.32303
751	153.37	78.8	44	0.120175			96.2	0.012396	1.28857
752	153.627	79	44	0.12081			92.1	0.01242	1.34853
753	153.885	79.2	41.9	0.120963			94.8	0.012482	1.31667
754	154.142	79.3	37.6	0.121305			103.5	0.012562	1.21372
755	154.399	79.5	31.4	0.121589			99.2	0.012643	1.2745
756	154.656	79.3	25.5	0.121729			91.7	0.012725	1.38768
757	154.913	78.7	20.9	0.121241			89.2	0.012793	1.43419
758	155.17	77.5	17.7	0.11994			87.6	0.012852	1.46712
759	155.427	75.9	17.1	0.117915			87.5	0.012897	1.47394
760	155.685	74.2	18.4	0.115716			89.8	0.01293	1.43987
761	155.942	73	20.8	0.114052			92.9	0.012951	1.39408
762	156.199	71.9	22.1	0.11333			94.7	0.012967	1.36927
763	156.456	71.2	22.4	0.113059			94	0.013002	1.38319
764	156.713	72.1	22.4	0.112247			92.1	0.013085	1.42074
765	156.97	72.7	19.7	0.110786			90.4	0.013238	1.46438
766	157.227	74.1	16.4	0.109575			91	0.01342	1.47473
767	157.484	75.9	13.3	0.109382			93.8	0.013609	1.45085
768	157.742	77	11.4	0.110192			94.8	0.013756	1.45105
769	157.999	77	10.1	0.111406			93	0.013879	1.49237
770	158.256	77.8	9.5	0.112666			91.6	0.013937	1.52151
771	158.513	77.5	11	0.113514			92.9	0.013895	1.49569
772	158.77	77	13.8	0.113766			93.5	0.013711	1.46642
773	159.027	77.5	14.7	0.113158			94.3	0.013405	1.42153
774	159.284	78.2	14	0.11206			95.3	0.013038	1.3681
775	159.541	79.1	12	0.110885			92.8	0.012723	1.37101
776	159.799	79.1	11.8	0.110553			86.5	0.012512	1.44647
777	160.056	75.4	14.8	0.111475			80.9	0.01243	1.53646
778	160.313	75	18	0.113591			78.5	0.012446	1.58548
779	160.57	74.4	22.9	0.116416			79.8	0.012498	1.56617
780	160.827	74.2	26.8	0.119436			82.7	0.012529	1.51499
781	161.084	74.4	28.7	0.122265			83.3	0.012507	1.50144
782	161.341	75.2	28.3	0.124618			80.2	0.012425	1.54925
783	161.599	75.8	23.7	0.126433			76.8	0.012268	1.5974
784	161.856	76.7	19.1	0.127142			75.2	0.012028	1.59947
785	162.113	77.4	14.4	0.12718			75.1	0.011721	1.56072
786	162.37	78.1	11.3	0.126132			75.2	0.011359	1.51051
787	162.627	78.5	11.3	0.124347			73.8	0.011039	1.4958
788	162.884	78.7	15.2	0.121962			70.8	0.010821	1.52839
789	163.141	78.1	22.1	0.119442			66.9	0.010769	1.60972
790	163.398	76.5	29.3	0.116548			64.5	0.010916	1.6924
791	163.656	74.3	34.5	0.114093			63.9	0.011291	1.76698
792	163.913	72.1	35.2	0.112678			64.3	0.011813	1.83717
793	164.17	71.2	32.3	0.112102			66.3	0.012404	1.87089
794	164.427	71.1	27.4	0.112395			70.3	0.013025	1.85277
795	164.684	71.2	22.1	0.112697			74.9	0.013619	1.81829
796	164.941	71.2	17	0.11242			76.2	0.014145	1.8563
797	165.198	71	13.6	0.111787			76.4	0.01464	1.91623
798	165.456	70.7	11.2	0.110557			78.6	0.015116	1.92316
799	165.774	70.6	8.2	0.108697			82.7	0.015618	1.88851
800	166.114	70.4	4.3	0.106912			85.8	0.016232	1.89184
801	166.453	70.2	0.8	0.106494			82.6	0.017027	2.06138
802	166.793	69.1	-0.9	0.106552			76.6	0.017843	2.32937
803	167.132	68.2	-0.6	0.106658			78	0.018435	2.36346
804	167.472	67.7	-0.1	0.105961			89.1	0.018464	2.07228
805	167.811	68.3	1.5	0.104227			104	0.017889	1.7201
806	168.151	70.5	2.2	0.102903			110	0.016762	1.52382
807	168.49	71.4	1.6	0.102373			100.1	0.015544	1.55285
808	168.83	72.9	0.5	0.102755			83	0.014509	1.74807
809	169.169	73.7	0.4	0.103968			69.2	0.013724	1.98324
810	169.509	73.8	2	0.10501			61.6	0.01314	2.13312
811	169.849	73.5	5	0.10529			58.5	0.012714	2.17333
812	170.188	73.4	8	0.104786			57.3	0.012429	2.16911
813	170.528	73.6	9.3	0.102809			56.1	0.012276	2.18824
814	170.867	74.1	7.3	0.100636			54.6	0.012211	2.23645
815	171.207	74.5	2	0.0990226			54.4	0.012184	2.23971
816	171.546	74.5	-5.8	0.0992815			56.3	0.012134	2.15524
817	171.886	73.8	-13.6	0.101644			60.1	0.012024	2.00067
818	172.225	72.7	-19.2	0.105416			62.4	0.011844	1.89808
819	172.565	71.9	-23	0.109953			62.5	0.011556	1.84896
820	172.904	71.8	-25	0.113455			62	0.011092	1.78903
821	173.244	72.6	-25.7	0.114693			61.2	0.010377	1.69559
822	173.584	74.5	-27.2	0.115002			60.1	0.0091728	1.52626
823	173.923	77.3	-30.3	0.111231			59	0.0077247	1.30927
824	174.263	79.3	-48.7	0.105441			54.7	0.0060729	1.11022
825	174.602	76.1	-22.5	0.101474			61.0909	0.0028594	0.468057
826	174.942	72.3	-8.1	0.101268			62.7273	0.0073871	1.17765
827	175.281	69.1	0.1	0.104455			56.5882	0.0091189	1.61145
828	175.621	67	4.9	0.107701			55.4	0.010396	1.87653
829	175.96	66.8	8.4	0.109513			61.5	0.01141	1.85528
830	176.3	67.1	9.5	0.110749			68	0.012022	1.76794
831	176.652	68.1	8.3	0.111933			74.4	0.012325	1.65659
832	177.034	69.4	5.9	0.113605			79.5	0.012444	1.56528
833	177.416	70.3	3.1	0.114945			82.6	0.012456	1.50799
834	177.798	71.4	2.1	0.11454			84.2	0.01242	1.47506
835	178.18	72.2	1.7	0.111735			86.7	0.012366	1.4263
836	178.562	72.2	-0.9	0.106205			88	0.012311	1.39898
837	178.944	72.7	-5.8	0.0995286			85.9	0.012291	1.43085
838	179.326	71.7	-11.5	0.0934752			82.4	0.012378	1.50218
839	179.708	71.4	-14.4	0.0905518			83.9	0.012584	1.49988
840	180.09	72.2	-13.2	0.0905889			91.4	0.012819	1.40252
841	180.472	74.2	-8.4	0.092619			97	0.012975	1.33763
842	180.854	77.2	-0.2	0.0959633			94.6	0.013008	1.37505
843	181.236	79.8	11.9	0.0991432			88.1	0.012942	1.46901
844	181.618	80.5	26.9	0.102232			82.4	0.012753	1.54769
845	182	78.7	30.9	0.103432			78.4	0.012477	1.59145
846	182.382	76.8	26.7	0.102825			75.5	0.012169	1.61179
847	182.764	75.5	22.7	0.100255			73.7	0.011859	1.60909
848	183.146	75.2	16.8	0.0967835			72.7	0.011603	1.59601
849	183.528	74.8	9.2	0.0928125			71.3	0.01142	1.60168
850	183.911	73.7	0.7	0.0888343			69.4	0.011315	1.6304
851	184.293	73.1	-5.7	0.085665			66.9	0.011287	1.68714
852	184.675	72.2	-10.6	0.0826692			65	0.011326	1.74246
853	185.057	72.3	-13.2	0.0799487			64.4	0.011417	1.77283
854	185.439	70.6	-14.2	0.0774289			65.2	0.011535	1.76917
855	185.821	70.1	-13.7	0.0754678			66.4	0.011655	1.75527
856	186.203	73.3	-6.9	0.0737087			66.6	0.011766	1.76667
857	186.585	72.4	-0.2	0.0721651			66.7	0.011868	1.77931
858	186.967	71.8	5	0.0705738			67.2	0.011933	1.77574
859	187.349	75.8	18.7	0.0684641			67.6	0.011964	1.76982
860	187.731	78.2	32.1	0.0655086			68	0.011948	1.75706
861	188.113	81.9	63.9	0.0616415			67.5	0.011902	1.76326
862	188.495	79.6	131.2	0.0569562			66	0.011854	1.79606
863	188.877	72.6	151.6	0.0534			64.4	0.011833	1.83742
864	189.259	69.9	153.3	0.0509877			63.5	0.011863	1.86819
865	189.641	77.7	118.2	0.0489936			64.8	0.011933	1.84151
866	190.023	76.2	118.6	0.0463697			67.8	0.01201	1.77139
867	190.405	76	79.4	0.0435293			71.6	0.012025	1.67947
868	190.787	72.6	56	0.0398722			74.3	0.011933	1.60606
869	191.169	69.8	45.9	0.03615			73.6	0.01174	1.59511
870	191.551	68.9	40.3	0.0325523			69.3	0.011504	1.66003
871	191.933	68.9	34.7	0.0295856			63	0.011282	1.79079
872	192.313	69.5	26.9	0.0272533			59.4	0.011047	1.85976
873	192.666	71.1	16.2	0.0256224			57.4	0.010797	1.88101
874	193.02	74.4	0	0.024651			55.3	0.010504	1.89946
875	193.373	79.4	-28.6	0.0246225			52.8	0.010174	1.92689
876	193.727	82	-78	0.0254852			49.4	0.0098721	1.9984
877	194.08	81.1	-115	0.0273883			45.8	0.00962	2.10044
878	194.433	82.4	-121	0.029523			42.8	0.0094514	2.20827
879	194.787	84.1	-136	0.0307292			40.1	0.0093604	2.33426
880	195.14	85.5	-149.7	0.0308113			37.3	0.0093234	2.49957
881	195.494	86.3	-142.6	0.030289			36.3	0.0093204	2.5676
882	195.847	85.8	-106.2	0.0299911			37.3	0.0093482	2.50622
883	196.201	83.2	-75.2	0.030548			38.7	0.0094339	2.4377
884	196.554	79.9	-56.7	0.0321991			39.1	0.0096121	2.45834
885	196.907	77.5	-44.9	0.0344119			38.3	0.0098573	2.57371
886	197.261	75.5	-28.6	0.0369687			37.8	0.010133	2.68069
887	197.614	74.8	-23.2	0.0394653			38.8	0.010413	2.68376
888	197.968	73.6	-17.7	0.0420552			40.4	0.010666	2.6401
889	198.321	75.8	-13.4	0.0443858			41.4	0.010897	2.63213
890	198.675	77.7	-17.5	0.0463564			42	0.01111	2.64524
891	199.028	77.8	-13.7	0.0479219			43.7	0.011299	2.58558
892	199.381	77.4	-10.9	0.0492126			45.8	0.011419	2.49323
893	199.735	76.4	-10.4	0.0504717			47.2	0.011467	2.42945
894	200.088	75.6	-2.5	0.0517119			47.2	0.011473	2.43072
895	200.442	73.5	-3.6	0.053097			45.8	0.01148	2.50655
896	200.795	71.4	-5.2	0.0549379			46.3	0.011506	2.4851
897	201.149	79.8	-5.6	0.057677			48.7	0.011537	2.36899
898	201.502	69.7	-5	0.060853			47	0.011554	2.4583
899	201.855	71.4	-9.3	0.0643581			43.2	0.011544	2.67222
900	202.209	72.2	-8.2	0.0672927			40.2	0.011507	2.86244
901	202.562	71.7	-8.8	0.0695422			38.1	0.011449	3.00499
902	202.916	71.9	-17.1	0.0709913			37.4	0.011383	3.04358
903	203.269	72.2	-26.8	0.0719172			38.2	0.011307	2.95995
904	203.623	72.6	-36	0.0722342			39.7	0.011219	2.82594
905	203.976	73.3	-43.6	0.0720099			40.4	0.011117	2.75173
906	204.329	74.2	-51.4	0.0716645			40.3	0.010991	2.7273
907	204.683	74.3	-57.1	0.0717947			39.6	0.010905	2.75379
908	205.036	73.2	-59.5	0.0725871			38.2	0.010933	2.86204
909	205.39	71.3	-57.3	0.0734859			37.7	0.011112	2.94748
910	205.743	69.5	-51.9	0.073402			43.3	0.011354	2.62217
911	206.096	69	-43.8	0.0715781			52	0.011515	2.21442
912	206.45	69.9	-33.2	0.0675213			52.5	0.011521	2.19448
913	206.803	71.9	-19.9	0.0621042			47.5	0.011376	2.39495
914	207.157	74.3	-2.8	0.056547			42.1	0.011178	2.65511
915	207.51	75.9	12.5	0.0540325			36.9	0.010993	2.97913
916	207.864	76.5	21.5	0.0547641			34.3	0.010863	3.16706
917	208.217	76.3	23.6	0.0586645			34.9	0.010802	3.09513
918	208.57	75.5	22.8	0.0650054			37.4	0.010774	2.88075
919	208.924	74.9	20.9	0.0718838			39.4	0.010761	2.73122
920	209.277	75	17.2	0.0772268			39.9	0.010745	2.69298
921	209.631	75.4	11.2	0.0806264			40	0.010742	2.6855
922	209.984	73.5	4	0.0826505			38.8	0.010815	2.78737
923	210.338	73.7	-0.3	0.0837174			36.6	0.010993	3.00355
924	210.691	71.3	-1.6	0.0835954			36.1	0.011228	3.11025
925	211.044	72.4	1.8	0.0822653			37.3	0.011426	3.06327
926	211.398	72.6	7.8	0.0797695			37.5	0.011577	3.0872
927	211.751	73.4	13.1	0.0756815			35.9	0.011687	3.25543
928	212.105	73.5	13.7	0.0698489			34	0.0118	3.47059
929	212.458	74.1	9	0.0631352			34.4	0.011933	3.4689
930	212.812	74.9	-0.9	0.0569786			37.9	0.012036	3.17573
931	213.165	75.2	-8.9	0.0526741			41.8	0.012074	2.88852
932	213.518	77.6	-12.9	0.0505215			42.2	0.012045	2.85427
933	213.872	77	-6.1	0.0497985			40.3	0.011996	2.97667
934	214.225	76.4	2.5	0.0494893			35.8	0.011972	3.34413
935	214.579	75.2	7	0.0491019			32.4	0.011986	3.69938
936	214.932	73.6	8.7	0.0479679			32.7	0.011997	3.66881
937	215.286	72.4	6.7	0.0464506			34.1	0.011964	3.5085
938	215.639	72.5	1	0.0451038			34.9	0.011886	3.40573
939	215.992	74	-8.8	0.0446972			34.4	0.011788	3.42674
940	216.346	75.8	-18.9	0.0460274			33.7	0.011726	3.47953
941	216.699	77.2	-29.6	0.0484575			33.9	0.011712	3.45487
942	217.053	78.4	-36.9	0.051118			35	0.011753	3.358
943	217.406	79.6	-42	0.053265			36.4	0.011836	3.25165
944	217.76	80.8	-46.5	0.0551423			37.8	0.011967	3.16587
945	218.113	81.6	-49	0.0565383			40.7	0.012133	2.98108
946	218.466	82.1	-44.9	0.0578715			44.2	0.012304	2.78371
947	218.82	81	-34.9	0.0595627			46.2	0.012467	2.69848
948	219.173	80.3	-17.2	0.0621756			47.1	0.01262	2.67941
949	219.527	78.5	-6.4	0.0652494			48.7	0.012737	2.6154
950	219.88	76.6	-2.5	0.0686006			52	0.012796	2.46077
951	220.168	75.5	1.5	0.0717251			55.1	0.012794	2.32196
952	220.426	75	3.6	0.0746122			57.4	0.01273	2.21777
953	220.684	77.4	4.6	0.0766232			59.1	0.012609	2.1335
954	220.942	78.8	1.1	0.0777448			58.6	0.012455	2.12543
955	221.199	79.5	-1.4	0.0775788			56.5	0.012299	2.17681
956	221.457	79.7	-7.1	0.0768696			55.1	0.012174	2.20944
957	221.715	78.6	-11	0.0765942			54.8	0.012079	2.2042
958	221.973	77.3	-12.7	0.0774547			55.2	0.012027	2.1788
959	222.23	76.8	-13.5	0.0790162			58.4	0.011993	2.0536
960	222.488	77.6	-14	0.0809634			62.5	0.011961	1.91376
961	222.746	79.1	-13.8	0.0828568			64.7	0.011934	1.84451
962	223.004	80.5	-16.4	0.0843901			64.5	0.011932	1.84992
963	223.261	80.8	-22	0.0859929			63.1	0.011982	1.89889
964	223.519	78.6	-25.8	0.0883034			62.2	0.012092	1.94405
965	223.777	76.1	-28.7	0.0911677			63.8	0.01224	1.9185
966	224.035	73.7	-30	0.0945039			67.6	0.012363	1.82885
967	224.292	71.6	-30.1	0.0982189			70.1	0.012445	1.77532
968	224.55	68.1	-29.6	0.102376			70.8	0.012441	1.7572
969	224.808	67.2	-29.2	0.10723			70.7	0.012328	1.74371
970	225.066	66.7	-29.2	0.112282			69	0.012059	1.74768
971	225.324	66.8	-29.1	0.116681			66.8	0.011599	1.73638
972	225.581	67.8	-28.2	0.119476			64.7	0.010834	1.6745
973	225.839	70.1	-26.2	0.120509			63.1	0.0096925	1.53605
974	226.097	74.4	-23.6	0.118393			61.1	0.0080583	1.31887
975	226.355	79.9	-12.9	0.116615			65.2941	0.0060541	0.927205
976	226.612	69.7	-5.8	0.193989			65.2727	0.007535	1.15439
977	226.87	69.2	-1.8	0.190416			60.5882	0.008766	1.44682
978	227.128	69.5	-0.1	0.185462			56.6	0.0095575	1.6886
979	227.386	70.2	-0.9	0.182748			57	0.0099986	1.75414
980	227.643	70.5	-3.7	0.182541			56.1	0.010244	1.82602
981	227.901	70.3	-6.8	0.184356			54.2	0.010401	1.919
982	228.159	69.4	-10.2	0.186241			53.4	0.01054	1.97378
983	228.417	69.6	-13.1	0.187606			55.4	0.010684	1.92852
984	228.675	69.8	-16.3	0.18826			56.8	0.010799	1.90123
985	228.932	70.6	-19.1	0.188203			55.9	0.0109	1.94991
986	229.19	71.2	-20.1	0.187319			54.3	0.011011	2.02781
987	229.448	71.2	-17.8	0.185952			53.3	0.011167	2.09512
988	229.706	72.6	-15	0.184918			53	0.011386	2.1483
989	229.963	71.5	-10.6	0.185448			53.2	0.011625	2.18515
990	230.221	69.3	-6.7	0.187314			53.9	0.011828	2.19443
991	230.479	67.3	-3.4	0.188915			54	0.011937	2.21056
992	230.737	64.5	0.1	0.188784			53.2	0.011917	2.24004
993	230.994	67	3.1	0.187226			51.9	0.011796	2.27283
994	231.252	68.2	5.8	0.183712			49.7	0.01161	2.33602
995	231.51	69.9	7.6	0.179498			46.4	0.011442	2.46595
996	231.768	71.5	8	0.17361			43.3	0.011356	2.62263
997	232.026	72	6.7	0.166232			42.2	0.011384	2.69763
998	232.283	72.5	4.9	0.158586			42.3	0.011506	2.72009
999	232.541	73.3	2.8	0.150668			43	0.011692	2.71907
1000	232.799	71.6	0.4	0.142624			43.7	0.011914	2.72632
1001	233.057	71.7	-2	0.135034			44.4	0.012137	2.73356
1002	233.314	71.3	-5.1	0.127704			44.7	0.012311	2.75414
1003	233.576	71.4	-8.6	0.121002			44.3	0.012397	2.79842
1004	233.957	72.7	-12	0.114547			43	0.012382	2.87953
1005	234.337	73.3	-15.5	0.108853			40.6	0.012313	3.03276
1006	234.718	73.6	-17.2	0.103705			38	0.012258	3.22579
1007	235.098	73.3	-17	0.0993221			36.5	0.012244	3.35452
1008	235.479	72.2	-16	0.0964967			36.2	0.012267	3.38867
1009	235.859	70.7	-15.2	0.0951158			35.9	0.012313	3.42981
1010	236.24	68.8	-14.6	0.0948926			34.9	0.012371	3.5447
1011	236.62	67.3	-14	0.0947584			33.8	0.012426	3.67633
1012	237.001	66.6	-13.1	0.0936599			32.9	0.012469	3.78997
1013	237.381	66.9	-12.3	0.0917106			32.7	0.012465	3.81193
1014	237.762	68.7	-12.5	0.0885456			33.7	0.012379	3.67329
1015	238.142	71.5	-14.6	0.0856561			34.2	0.012188	3.56374
1016	238.523	74.9	-17.8	0.0834346			33.1	0.011923	3.60211
1017	238.904	78.5	-25.3	0.0831986			30.8	0.011681	3.79253
1018	239.284	80.5	-30.3	0.0839962			28.9	0.011546	3.99516
1019	239.665	79.8	-31.5	0.0844761			27.7	0.011575	4.1787
1020	240.045	79.9	-25.5	0.0839498			27.4	0.011764	4.29343
1021	240.426	77.3	-23.6	0.0827517			28.2	0.012019	4.26206
1022	240.806	76.6	-21.7	0.0815325			30.3	0.012244	4.04092
1023	241.187	77.7	-22.5	0.0805918			32.6	0.012366	3.79325
1024	241.567	79	-28.5	0.0801736			34.3	0.012379	3.60904
1025	241.948	79.9	-38.3	0.0806801			34.4	0.01231	3.57849
1026	242.328	81	-44.6	0.0820493			34.3	0.012201	3.55714
1027	242.709	81.6	-47.4	0.0839798			34.9	0.012076	3.46017
1028	243.089	81.8	-47.3	0.0855217			35.1	0.011986	3.41481
1029	243.47	80.9	-45.6	0.0861891			35.3	0.011948	3.3847
1030	243.85	79.6	-43.3	0.086129			35.6	0.011967	3.36152
1031	244.193	78.2	-40.6	0.0857364			36.1	0.012035	3.3338
1032	244.52	76.5	-37	0.0853749			37.2	0.012149	3.26586
1033	244.847	74.8	-33.1	0.0852114			39.3	0.01232	3.13486
1034	245.174	72.8	-30.6	0.0853731			42.1	0.012584	2.98907
1035	245.501	71	-30.6	0.0859694			46.4	0.012913	2.78297
1036	245.828	69.7	-31.1	0.0875072			52.9	0.013237	2.50227
1037	246.155	69.7	-30.9	0.0898592			59.9	0.013485	2.25125
1038	246.481	71	-29.8	0.0922696			62.9	0.013585	2.15978
1039	246.808	73.3	-28	0.0946964			62.3	0.013569	2.17801
1040	247.135	75.6	-26.3	0.0967934			60.1	0.013498	2.24592
1041	247.462	76.8	-25.7	0.0983553			58.1	0.013458	2.31635
1042	247.789	77.7	-23.1	0.0989172			57.1	0.013497	2.36375
1043	248.116	77.6	-21.2	0.098375			57.3	0.013602	2.37382
1044	248.443	77.4	-20.3	0.0971498			59.4	0.013711	2.30825
1045	248.77	77.5	-20.8	0.0954881			61.9	0.013782	2.22649
1046	249.097	77.7	-22.2	0.0933896			63.1	0.013813	2.18906
1047	249.423	77.5	-24.3	0.0910622			62.2	0.013824	2.22251
1048	249.75	77.1	-26.9	0.0889033			61.5	0.013828	2.24846
1049	250.077	77	-30.5	0.0884468			61.4	0.01383	2.25244
1050	250.404	77.4	-34.6	0.089874			60.4	0.01383	2.28974
1051	250.731	78.6	-36	0.0923571			59.1	0.013831	2.34027
1052	251.058	80.4	-31.7	0.095336			59.3	0.013834	2.33288
1053	251.385	81.7	-18.5	0.0975869			59.1	0.013849	2.34332
1054	251.712	81.2	-2.5	0.099034			58.4	0.013869	2.37483
1055	252.039	79.6	6	0.0995072			60	0.013872	2.312
1056	252.365	77.5	4.6	0.0997667			62	0.013848	2.23355
1057	252.692	76.1	-2.1	0.0999467			62.5	0.013834	2.21344
1058	253.019	73.8	-9.8	0.10028			61.6	0.013887	2.25438
1059	253.346	70.2	-14.3	0.100991			60.9	0.014006	2.29984
1060	253.673	67.9	-15.9	0.102115			61.2	0.014171	2.31552
1061	254	66.6	-15.6	0.103273			63.1	0.014302	2.26656
1062	254.327	66.7	-14.9	0.103332			66.3	0.014393	2.17089
1063	254.654	67.9	-14.2	0.102296			68.9	0.014426	2.09376
1064	254.981	69.9	-14.1	0.100442			69.1	0.014439	2.08958
1065	255.307	71.7	-15.8	0.0979921			67.6	0.014457	2.13861
1066	255.634	72.8	-18.8	0.0950006			67.2	0.01449	2.15625
1067	255.961	73.4	-22	0.091861			68.5	0.014525	2.12044
1068	256.288	73.6	-24.5	0.0885626			69.9	0.014555	2.08226
1069	256.615	73.7	-25.2	0.0844131			70.7	0.014566	2.06025
1070	256.942	73.5	-23.3	0.0796018			70.1	0.014552	2.07589
1071	257.269	73.1	-20.4	0.0749461			68.6	0.014504	2.11429
1072	257.596	71.5	-18.4	0.0705422			67.4	0.014432	2.14125
1073	257.923	72.4	-16.7	0.0670954			67.1	0.014342	2.13741
1074	258.249	72.1	-14.8	0.0648812			67.3	0.014242	2.1162
1075	258.576	72	-7.1	0.0633643			66.5	0.014124	2.12391
1076	258.903	70.3	1	0.0626153			66	0.013964	2.11576
1077	259.23	70	2.4	0.0623959			67	0.013774	2.05582
1078	259.557	71.7	1.4	0.0624109			68.7	0.013548	1.97205
1079	259.884	74.7	-2.3	0.0625407			68.4	0.013358	1.95292
1080	260.211	77.9	-7.2	0.0631264			64.5	0.013223	2.05008
1081	260.538	79.8	-7.6	0.0641922			62.3	0.013117	2.10546
1082	260.865	76	-3.4	0.0655274			61.9	0.013014	2.10242
1083	261.191	75.2	2.8	0.0666363			63	0.012912	2.04952
1084	261.518	74.7	6.4	0.0677749			63.2	0.01279	2.02373
1085	261.845	74.8	5.4	0.0695316			63	0.012662	2.00984
1086	262.172	75.3	-1.8	0.0728852			63	0.012533	1.98937
1087	262.499	76.2	-20	0.0778435			61.9	0.0124	2.00323
1088	262.826	75.9	-37.3	0.0843422			60.5	0.012282	2.03008
1089	263.153	76.4	-53.1	0.0924563			61.5	0.012163	1.97772
1090	263.48	80.3	-60.8	0.101233			64.2	0.01205	1.87695
1091	263.807	85.9	-106.7	0.107878			65.9	0.011927	1.80986
1092	264.133	85.5	153.2	0.109885			68.7	0.011762	1.71208
1093	264.46	80.9	122.3	0.106981			74.2	0.011562	1.55822
1094	264.787	78.2	104.1	0.102825			75.1	0.011333	1.50905
1095	265.114	79.2	80.8	0.100103			70.9	0.011141	1.57137
1096	265.441	80.5	48.1	0.0969994			69	0.011019	1.59696
1097	265.768	80.3	18.9	0.0938737			68.8	0.010953	1.59201
1098	266.095	78	-2.6	0.0907901			69.1	0.010917	1.57988
1099	266.422	77.5	-11.9	0.0897346			70.1	0.010889	1.55335
1100	266.749	77.4	-16.6	0.0907277			71.6	0.010853	1.51578
1101	267.075	76.7	-18.7	0.0930862			72.1	0.010819	1.50055
1102	267.402	75.1	-19.8	0.0962073			70.4	0.010806	1.53494
1103	267.729	73	-20.8	0.099452			68.6	0.010812	1.57609
1104	268.056	71	-21.8	0.101892			68.8	0.010822	1.57297
1105	268.383	69.5	-22.5	0.103349			69.5	0.010819	1.55669
1106	268.71	69	-22.7	0.103347			69.7	0.010797	1.54907
1107	269.037	69.1	-22.3	0.102229			70.4	0.01076	1.52841
1108	269.364	69.1	-24.1	0.100786			70.8	0.01073	1.51554
1109	269.691	70	-24.4	0.0998138			71.2	0.01074	1.50843
1110	270.018	71.8	-23.5	0.0992156			70.9	0.010838	1.52863
1111	270.344	72.9	-21.7	0.0980109			69.7	0.011078	1.58938
1112	270.671	77.5	-23.8	0.0954196			70.5	0.011417	1.61943
1113	270.998	79.1	-20.3	0.0911001			73.7	0.011793	1.60014
1114	271.325	82.1	-13.4	0.0871403			80.6	0.012152	1.50769
1115	271.652	78.7	-20.8	0.084015			87.3	0.012536	1.43597
1116	271.979	76.1	-26.3	0.0832652			85.7	0.012883	1.50327
1117	272.306	72.9	-30.4	0.0844113			83.2	0.013207	1.58738
1118	272.633	70.1	-32.3	0.0857242			82	0.01352	1.64878
1119	272.96	68.6	-32.2	0.0864464			78.6	0.013823	1.75865
1120	273.286	68.3	-31.4	0.0859264			76.4	0.01406	1.84031
1121	273.613	69	-30	0.0839561			77.5	0.014083	1.81716
1122	273.94	70.5	-28.5	0.0807874			81.8	0.013724	1.67775
1123	274.267	71.5	-24.4	0.0763065			88.1	0.012739	1.44597
1124	274.594	76.4	-26.2	0.071689			93.9	0.010997	1.17114
1125	274.921	81.1	-23.9	0.0678468			110.235	0.0086683	0.786345
1126	275.248	68.3	-33.6	0.0791801			90.1818	0.010002	1.10909
1127	275.575	67.9	-26.8	0.0815442			84.8235	0.011497	1.3554
1128	275.902	67.8	-22.2	0.0839955			75.7	0.012351	1.63157
1129	276.228	67.4	-19.9	0.0855429			72.7	0.012794	1.75983
1130	276.555	67.7	-18.1	0.0862301			71.1	0.013018	1.83094
1131	276.882	68.1	-16.9	0.0860788			69.4	0.013101	1.88775
1132	277.209	69.1	-16.2	0.0851319			66.8	0.013093	1.96003
1133	277.536	69.4	-19.3	0.0839219			63.4	0.013015	2.05284
1134	277.863	70.2	-23.3	0.0825947			59.9	0.012887	2.15142
1135	278.19	70.9	-28	0.0813082			56.6	0.012719	2.24717
1136	278.517	71.1	-31.8	0.0790929			53.6	0.01255	2.34142
1137	278.844	71.7	-33.5	0.0758965			50.1	0.012419	2.47884
1138	279.17	71.6	-34.1	0.071907			46.5	0.012354	2.65677
1139	279.497	71.5	-33.8	0.0683175			43.5	0.012363	2.84207
1140	279.824	71.4	-32.8	0.0656478			42	0.012428	2.95905
1141	280.151	71.4	-31.7	0.063882			41.3	0.01252	3.03148
1142	280.823	71.6	-31.1	0.0629681			40.8	0.012619	3.09289
1143	281.504	72.1	-31.5	0.0624352			38.1	0.012721	3.33885
1144	282.184	73	-33.3	0.0617214			35.2	0.012843	3.64858
1145	282.865	75	-37.1	0.0603756			34.6	0.013027	3.76503
1146	283.545	77.8	-44.1	0.0584735			35.4	0.013218	3.7339
1147	284.226	81.1	-59.9	0.0560407			36.2	0.013399	3.70138
1148	284.906	82.8	-90.1	0.0534001			37	0.013487	3.64514
1149	285.587	81.9	-110.1	0.051191			36.9	0.013468	3.64986
1150	286.267	80.6	-107.2	0.0498784			36.6	0.013341	3.64508
1151	286.948	79.6	-92.7	0.0496375			36.7	0.013151	3.58338
1152	287.628	77.4	-72.8	0.0501812			36.1	0.012901	3.57368
1153	288.309	76.6	-61.6	0.0508965			34.7	0.012657	3.64755
1154	288.989	76.3	-52	0.0513662			33.4	0.012483	3.73743
1155	289.67	76.6	-45.7	0.0517276			32.6	0.012407	3.80583
1156	290.35	76.4	-41.4	0.0523184			33.2	0.012416	3.73976
1157	291.021	76.5	-42.3	0.0531849			33.7	0.012469	3.7
1158	291.608	76.2	-44.6	0.0543792			34.1	0.012529	3.67419
1159	292.195	76.3	-48.1	0.055769			34.6	0.012566	3.63179
1160	292.781	75.6	-49.7	0.057265			35.3	0.012549	3.55496
1161	293.368	73.6	-48.3	0.0587412			35.7	0.012462	3.49076
1162	293.955	73.2	-48.4	0.0607093			35.5	0.012316	3.4693
1163	294.542	73.2	-47.1	0.0625764			34.7	0.012163	3.50519
1164	295.128	73	-40.3	0.0641336			33.7	0.012014	3.56499
1165	295.715	73.4	-31.3	0.0640694			32.9	0.011911	3.62036
1166	296.302	74.2	-21	0.0627556			33	0.011848	3.5903
1167	296.888	74.6	-12.4	0.0617034			34.2	0.011804	3.45146
1168	297.475	75.8	-9.2	0.0613583			35.9	0.011796	3.28579
1169	298.062	75	-12.5	0.0619338			37.5	0.011867	3.16453
1170	298.648	75.5	-18.9	0.0626167			38.9	0.012039	3.09486
1171	299.235	75.2	-26.3	0.0635198			40.3	0.012263	3.04293
1172	299.822	75	-33.3	0.0648608			42.1	0.012471	2.96223
1173	300.408	74.6	-40.1	0.0672385			44	0.012587	2.86068
1174	300.995	73.8	-45.9	0.0707836			45.7	0.012601	2.75733
1175	301.582	72.5	-49.7	0.0760848			46.7	0.012542	2.68565
1176	302.168	71.2	-51.3	0.082225			47.1	0.012456	2.64459
1177	302.755	70.2	-51.4	0.0886148			47.5	0.012368	2.60379
1178	303.342	69.6	-50.4	0.0947612			46.8	0.012294	2.62692
1179	303.929	70.1	-48.7	0.0998747			45.6	0.012219	2.67961
1180	304.515	71.4	-45.6	0.10302			45.5	0.012127	2.66527
1181	305.102	73	-42.9	0.104805			45.9	0.012018	2.6183
1182	305.689	73.6	-39.6	0.105545			45.1	0.011934	2.64612
1183	306.275	73.7	-38.4	0.106451			43.6	0.011884	2.72569
1184	306.862	73	-38.5	0.10819			42.8	0.011873	2.77407
1185	307.434	72.3	-38.7	0.110582			42.9	0.011865	2.76573
1186	307.719	71.8	-38.6	0.112664			42.6	0.011822	2.77512
1187	308.005	71.6	-38.5	0.113694			42.3	0.011725	2.77187
1188	308.29	71.6	-39.2	0.113287			42.1	0.011591	2.75321
1189	308.576	71.4	-40.9	0.11216			41	0.011479	2.79976
1190	308.861	71.1	-43.7	0.110936			39.8	0.011426	2.87085
1191	309.147	71.1	-46.8	0.110537			40.3	0.011419	2.8335
1192	309.432	71.7	-49.7	0.110895			41.5	0.011433	2.75494
1193	309.717	72.9	-52.4	0.112008			41.9	0.011441	2.73055
1194	310.003	74.4	-54.5	0.113485			42.3	0.011412	2.69787
1195	310.288	75.8	-55.8	0.11526			43.2	0.011338	2.62454
1196	310.574	76.9	-55.7	0.116679			43.1	0.011239	2.60766
1197	310.859	77.5	-53.7	0.117387			42.3	0.011146	2.63499
1198	311.145	77.6	-49.4	0.116408			41.8	0.011088	2.65263
1199	311.43	77.4	-43.3	0.112753			41.2	0.011097	2.69345
1200	311.716	76.9	-37.6	0.10677			40.2	0.011213	2.7893
1201	312.001	75.9	-33.7	0.0990403			39.4	0.011439	2.9033
1202	312.287	75.8	-29.9	0.091727			40.1	0.011762	2.93317
1203	312.572	74.4	-31.1	0.0863179			42	0.012164	2.89619
1204	312.858	74	-33.8	0.0833532			43.9	0.012615	2.87358
1205	313.143	73.1	-39.1	0.0819153			46.4	0.013068	2.81638
1206	313.429	72.5	-44.9	0.0809937			50.6	0.01347	2.66206
1207	313.714	71.5	-50.5	0.0793207			55.6	0.013796	2.48129
1208	314	71.5	-57.8	0.0766592			61.3	0.014047	2.29152
1209	314.285	72.3	-66.6	0.0730934			62.9	0.014323	2.27711
1210	314.57	73.4	-70.5	0.0697278			59.4	0.014701	2.47492
1211	314.856	78.8	-62.9	0.0665369			56.7	0.01532	2.70194
1212	315.141	81.2	21.9	0.067207			57	0.016183	2.83912
1213	315.427	60.2	53.5	0.083564			58.8	0.017238	2.93163
1214	315.712	40.6	58	0.115891			61.3	0.018493	3.0168
1215	315.998	27.7	57.8	0.155688			67.7	0.019761	2.91891
1216	316.283	21.3	57.6	0.197275			82.2	0.020693	2.5174
1217	316.569	17.6	56.5	0.224093			100	0.020939	2.0939
1218	316.854	16.5	55.7	0.231844			110.1	0.020567	1.86803
1219	317.14	16.7	54.7	0.216533			110.8	0.019675	1.77572
1220	317.3	17.8	53.2	0.18517			106.9	0.018462	1.72703
1221	317.457	22.6	51.8	0.142605			98.3	0.017268	1.75666
1222	317.615	30.9	49.3	0.102279			88.8	0.016103	1.8134
1223	317.772	47.4	45.6	0.0716868			78.2	0.015178	1.94092
1224	317.93	66.1	41.5	0.0588321			67.1	0.01444	2.15201
1225	318.088	77.7	35.3	0.0593193			58.2	0.013882	2.38522
1226	318.245	82.1	31.8	0.0649071			51.8	0.01344	2.59459
1227	318.403	82.2	31.1	0.0713009			48.2	0.013032	2.70373
1228	318.56	81.9	30.6	0.0770072			46.6	0.012705	2.72639
1229	318.718	82	28.5	0.081986			45.3	0.012429	2.74371
1230	318.876	82.3	25.7	0.0862459			43.7	0.012204	2.79268
1231	319.033	82.5	23.2	0.0894972			43.5	0.012005	2.75977
1232	319.191	82.5	21.4	0.0914808			44.7	0.011835	2.64765
1233	319.348	82.4	20.4	0.0920303			44.9	0.011706	2.60713
1234	319.506	80.6	21.2	0.0915888			42.8	0.011642	2.72009
1235	319.664	78.6	23.4	0.0903388			41.5	0.011625	2.8012
1236	319.821	76.3	25.1	0.0886418			42.2	0.011605	2.75
1237	319.979	74.7	25.7	0.0869927			43.5	0.011563	2.65816
1238	320.136	73.6	25.7	0.0856125			41.7	0.011531	2.76523
1239	320.294	72.8	25.9	0.0846351			37.2	0.011535	3.10081
1240	320.452	71.9	27.2	0.0836452			34.7	0.011549	3.32824
1241	320.609	71	29.6	0.0827818			35.9	0.011527	3.21086
1242	320.767	70.3	32.2	0.0818205			36.9	0.011438	3.09973
1243	320.924	69.6	34.3	0.0809604			36.6	0.011282	3.08251
1244	321.082	69.1	35.4	0.0804136			35.7	0.011071	3.10112
1245	321.24	69.4	35.3	0.0803507			33.5	0.010807	3.22597
1246	321.397	69.5	35.6	0.080721			31.1	0.010599	3.40804
1247	321.555	71	34.3	0.0809327			28.6	0.01041	3.63986
1248	321.712	72.3	33.8	0.0808616			26.5	0.010234	3.86189
1249	321.87	72.4	35.3	0.0802105			24.7	0.010068	4.07611
1250	322.028	73.9	36	0.0795829			23.9	0.0098495	4.12113
1251	322.185	74.6	38.8	0.078962			24.2	0.0095392	3.94182
1252	322.343	73.8	42.7	0.0791293			24.6	0.0091554	3.72171
1253	322.5	74.6	45.1	0.0801191			24	0.0087034	3.62642
1254	322.658	72.9	45	0.0815373			20.8	0.008295	3.98798
1255	322.816	73.4	41.4	0.0831699			17.2	0.0079639	4.63017
1256	322.973	72.8	37.4	0.0846599			14.9	0.0076708	5.14819
1257	323.131	71.4	35	0.0859194			13.5	0.0073957	5.4783
1258	323.288	70.8	33.6	0.0861499			12.8	0.0071465	5.5832
1259	323.446	71.2	33.3	0.0852966			12.1	0.006923	5.72149
1260	323.604	71.9	33.9	0.0833409			11.3	0.0067567	5.97938
1261	323.761	72.3	35.2	0.0806567			10.4	0.0066484	6.39269
1262	323.919	75.9	33.8	0.0779408			9.7	0.0065984	6.80247
1263	324.076	75.6	35.4	0.0757617			9.6	0.0065837	6.85802
1264	324.234	76.1	35.9	0.073887			9.7	0.0065939	6.79784
1265	324.392	76.2	36.5	0.0724653			9.4	0.0066239	7.0467
1266	324.549	74.2	39.2	0.0713143			9.6	0.0066612	6.93875
1267	324.707	73.7	41.1	0.0705888			10.1	0.006676	6.6099
1268	324.864	71.2	44.7	0.070189			10.7	0.0066423	6.20776
1269	325.022	72.4	46.7	0.0693984			10.8	0.0065384	6.05407
1270	325.18	70.6	49.5	0.0682664			10.6	0.0063364	5.97774
1271	325.337	65.5	51.7	0.0658596			10.9	0.0060126	5.51615
1272	325.495	63.4	52.5	0.0639465			10.4	0.0055433	5.3301
1273	325.652	66.3	54.4	0.0615729			9.5	0.0048485	5.10368
1274	325.81	66.9	56.8	0.0589808			9	0.003997	4.44111
1275	325.968	69.9	61.1	0.0565007			8.3	0.002962	3.56867
1276	326.125	73.1	3.2	0.0605662			9.45455	0.0038372	4.05858
1277	326.283	70.4	13.6	0.0624349			9.17647	0.0046107	5.02448
1278	326.44	69.6	20	0.0632404			8.8	0.0052602	5.9775
1279	326.598	70.5	23.5	0.0638033			9.2	0.0057032	6.19913
1280	326.756	70.6	25	0.0635629			9.3	0.0059865	6.4371
1281	326.913	69.9	24	0.0627613			9.2	0.0061711	6.70772
1282	327.071	69.5	21.7	0.0617055			9.4	0.0062912	6.69277
1283	327.228	70.6	18.9	0.060727			9.5	0.0063699	6.70516
1284	327.386	70.2	17.4	0.0600061			9.5	0.0063992	6.736
1285	327.544	70.9	17.6	0.0596269			9.7	0.0063956	6.5934
1286	327.701	71.7	18.8	0.0595712			10.2	0.0063534	6.22882
1287	327.859	73.2	19.9	0.0598691			10.6	0.0062491	5.89538
1288	328.016	74.7	19.1	0.0610205			10.7	0.0060634	5.66673
1289	328.174	75	16.2	0.0635072			10.4	0.0057598	5.53827
1290	328.332	74.1	12.7	0.0670545			9.9	0.0053802	5.43455
1291	328.489	73.1	10	0.0712054			9.2	0.0049716	5.40391
1292	328.647	75.8	8.5	0.0757498			8.6	0.0045928	5.34047
1293	328.804	74.9	8.8	0.079738			8.4	0.0043111	5.13226
1294	328.962	75.1	9.3	0.0829275			8.3	0.0040682	4.90145
1295	329.12	74.6	10.1	0.0857249			8.4	0.0038801	4.61917
1296	329.277	75.3	11.4	0.0876788			8.4	0.0037424	4.45524
1297	329.435	73.6	12.7	0.0880263			8.3	0.0036352	4.37976
1298	329.592	73.8	14.2	0.0873913			8.2	0.0035675	4.35061
1299	329.75	73.6	16.1	0.0853461			8.1	0.0035365	4.36605
1300	329.908	73.6	18.3	0.0822159			8.3	0.0035066	4.22482
1301	330.065	73.2	19.7	0.0788714			8.8	0.0034511	3.9217
1302	330.223	74.9	21.7	0.0763357			9.1	0.0033594	3.69165
1303	330.38	75.3	20.3	0.0750033			9.1	0.0032509	3.57242
1304	330.538	75.5	17.1	0.0757359			9	0.0031461	3.49567
1305	330.696	75.3	14.1	0.0762154			8.4	0.0030843	3.67179
1306	330.853	74.8	12.7	0.0756108			8.1	0.0031096	3.83901
1307	331.011	74	12.8	0.073768			8.1	0.0032224	3.97827
1308	331.168	73.4	13.4	0.0707194			8.6	0.0034022	3.95605
1309	331.326	73.2	14	0.0674055			9.1	0.0036375	3.99725
1310	331.484	73.8	14.5	0.0639964			9.7	0.0038655	3.98505
1311	331.641	75	14.7	0.060687			10.4	0.0040592	3.90308
1312	331.799	76.8	15.1	0.0579409			11	0.0041951	3.81373
1313	331.956	78.1	16.2	0.0559944			11.4	0.00429	3.76316
1314	332.114	78.7	17.5	0.0547551			11.5	0.0043749	3.80426
1315	332.272	78.2	18.1	0.0542718			11.3	0.0044816	3.96602
1316	332.429	77.2	17.6	0.0540562			11.2	0.0046529	4.15437
1317	332.587	76.1	17.1	0.053294			11.4	0.0049088	4.30596
1318	332.744	75.4	16.7	0.0514505			11.9	0.0052652	4.42454
1319	332.902	74.8	15.8	0.0490554			12.7	0.005679	4.47165
1320	333.06	74.2	14.2	0.0467497			13.7	0.0061107	4.46036
1321	333.217	73.6	12	0.045439			14.5	0.0064768	4.46676
1322	333.375	73.1	9.7	0.0454014			14.6	0.0068112	4.66521
1323	333.532	72.7	8.4	0.0458651			14.3	0.0071363	4.99042
1324	333.69	72.5	8.7	0.0466267			14.4	0.0075037	5.2109
1325	333.848	70.8	9.8	0.0473491			15.4	0.0078474	5.09571
1326	334.005	70.5	12.2	0.0481617			16.8	0.0081683	4.86208
1327	334.163	73.3	16.3	0.0492515			17.9	0.0084252	4.70682
1328	334.32	70.7	15.5	0.0502337			18.7	0.0086435	4.62219
1329	334.478	71.2	15.4	0.0512373			18.5	0.0088563	4.78719
1330	334.636	73	14.7	0.0521497			17.8	0.0090884	5.10584
1331	334.793	73.5	12.7	0.0530538			18.2	0.0093783	5.15291
1332	334.951	73.7	11.9	0.0541221			20.2	0.0096286	4.76663
1333	335.108	73.7	13.1	0.0555067			21.8	0.0098424	4.51486
1334	335.266	73.8	15.1	0.0568068			21.6	0.010018	4.63796
1335	335.424	74.2	16.7	0.0578586			21.2	0.010207	4.81462
1336	335.581	74.9	16.4	0.0585834			22.9	0.010434	4.55633
1337	335.739	75.9	13.6	0.0597682			27.2	0.010693	3.93125
1338	335.896	76.6	10.3	0.0613026			30.7	0.010989	3.57948
1339	336.054	77	9.6	0.0635213			30.9	0.011257	3.64304
1340	336.212	76.6	13.9	0.0661774			30.1	0.011477	3.81296
1341	336.369	77.2	22.7	0.0689612			29.5	0.01162	3.93898
1342	336.527	76.9	34.2	0.0715654			29.2	0.011719	4.01336
1343	336.684	76.8	43.3	0.0732641			29.2	0.011794	4.03904
1344	336.842	77.1	47.3	0.0738798			29.8	0.011849	3.97617
1345	337	76.6	46.1	0.0734911			30.5	0.011883	3.89607
1346	337.157	75.6	41.8	0.0730468			30.6	0.011895	3.88725
1347	337.315	75.3	36.6	0.0732655			30.2	0.011883	3.93477
1348	337.472	75.3	31.8	0.0741417			29.9	0.011839	3.95953
1349	337.63	75.4	28.4	0.0753628			29.5	0.011764	3.9878
1350	337.788	75.6	25.6	0.076661			28.9	0.011676	4.04014
1351	337.945	75.2	21.8	0.0783532			28.8	0.011594	4.02569
1352	338.103	74.9	19.1	0.0799646			29.3	0.011528	3.93447
1353	338.26	74.3	16.8	0.081009			29.7	0.011497	3.87104
1354	338.418	73.5	15.1	0.0810264			30.1	0.011521	3.82757
1355	338.576	73.1	13.5	0.0803243			30.6	0.011596	3.78954
1356	338.733	72.9	11.8	0.0794192			31.1	0.0117	3.76206
1357	338.891	71.2	9.4	0.0788933			32.6	0.011783	3.61442
1358	339.048	71.2	6.7	0.0789868			35.3	0.011805	3.34419
1359	339.206	72.5	4.3	0.0796898			38.3	0.011757	3.06971
1360	339.364	73.3	1	0.0811316			37.5	0.011631	3.1016
1361	339.521	74.1	-1.6	0.0836196			36.1	0.011455	3.17313
1362	339.679	74.9	-2.8	0.0869086			37.1	0.011269	3.03747
1363	339.921	75.6	-2.5	0.0898484			39.9	0.011149	2.79424
1364	340.219	76.4	-1.3	0.0910756			45	0.011134	2.47422
1365	340.518	77.3	-0.1	0.0900657			51.1	0.01122	2.19569
1366	340.816	77.8	0.2	0.0877875			55.1	0.011356	2.06098
1367	341.114	77.8	-0.8	0.0852908			57.4	0.011492	2.00209
1368	341.413	77.5	-2	0.0832358			58.8	0.011543	1.9631
1369	341.711	76.7	-1.9	0.082219			59.1	0.01148	1.94247
1370	342.009	77.8	-2.1	0.0825949			58.8	0.011291	1.92024
1371	342.308	78.6	-1.7	0.0855471			58.7	0.011008	1.8753
1372	342.606	79	-0.2	0.091815			58.4	0.010694	1.83116
1373	342.904	79.2	-1.5	0.102091			56.2	0.010483	1.8653
1374	343.203	78.6	-1.9	0.113187			53.8	0.010478	1.94758
1375	343.501	78.4	-2	0.123204			54.8	0.010674	1.94781
1376	343.799	77.9	0.3	0.130602			59.7	0.0111	1.8593
1377	344.098	77.5	4.8	0.133802			65.4	0.01158	1.77064
1378	344.396	75.5	9.4	0.134043			70	0.012075	1.725
1379	344.695	73.6	13.8	0.131925			74	0.012518	1.69162
1380	344.993	71.5	17	0.127972			76.7	0.012927	1.6854
1381	345.291	69.6	18.7	0.123631			78.1	0.013212	1.69168
1382	345.59	68	19.4	0.119585			79.4	0.013386	1.68589
1383	345.888	66.6	19.9	0.116863			81.2	0.013463	1.658
1384	346.186	65.7	20.5	0.115588			80.6	0.013507	1.67581
1385	346.485	65.6	21.4	0.115464			80	0.01358	1.6975
1386	346.783	66.5	22.4	0.116496			81.7	0.013669	1.67307
1387	347.081	68.1	22.3	0.118532			84.3	0.013722	1.62776
1388	347.38	69.7	21.4	0.120822			86.7	0.013699	1.58005
1389	347.678	71.1	18	0.123631			87.5	0.013607	1.55509
1390	347.976	71.9	14.8	0.126866			86.2	0.013457	1.56114
1391	348.275	72.4	12.7	0.130763			84.1	0.013294	1.58074
1392	348.573	72.4	11.4	0.134322			82.6	0.013162	1.59346
1393	348.871	73.3	12.4	0.137214			81.9	0.013034	1.59145
1394	349.17	73.8	12.1	0.13923			81.5	0.012948	1.58871
1395	349.468	73.8	9.6	0.140571			80.2	0.0129	1.60848
1396	349.767	74.8	10.1	0.141691			79.3	0.01288	1.62421
1397	350.065	74.7	10.3	0.142174			79.5	0.01286	1.61761
1398	350.363	74.2	11.6	0.141586			79.4	0.012801	1.61222
1399	350.662	73.6	13.2	0.140001			79.5	0.012679	1.59484
1400	350.96	72.6	14.5	0.137612			79.3	0.012483	1.57415
1401	351.258	72.6	15	0.135459			77.6	0.012245	1.57796
1402	351.557	72.9	15.2	0.133963			75.2	0.011956	1.58989
1403	351.855	73.3	15.7	0.133109			73.3	0.01168	1.59345
1404	352.153	73.5	16.4	0.133029			70.6	0.011407	1.61572
1405	352.452	73.5	17.3	0.132407			67.6	0.011188	1.65503
1406	352.75	73.5	18.1	0.131083			66.3	0.010979	1.65596
1407	353.048	73.3	18.4	0.129107			66.2	0.010778	1.6281
1408	353.347	73	17.9	0.126013			64.7	0.010586	1.63617
1409	353.645	72.5	15.7	0.123037			62.3	0.010434	1.6748
1410	353.944	71.5	12.2	0.120861			60.5	0.010305	1.70331
1411	354.242	72	8.8	0.119777			58.9	0.010191	1.73022
1412	354.54	73.3	3.5	0.119555			57.2	0.010137	1.7722
1413	354.839	73.9	-0.5	0.119608			55	0.010164	1.848
1414	355.137	73.9	-3.9	0.119769			52.5	0.010276	1.95733
1415	355.435	73.7	-4.8	0.119584			51.5	0.010452	2.02951
1416	355.734	73	-4.3	0.118905			53.2	0.010587	1.99004
1417	356.032	72.1	-1.6	0.118024			56.8	0.010637	1.87271
1418	356.33	71.2	1.4	0.116422			59.1	0.010564	1.78748
1419	356.629	70.5	5	0.114126			59.1	0.01035	1.75127
1420	356.927	69.7	9.2	0.110802			58.3	0.0099956	1.71451
1421	357.225	69.3	14.8	0.108001			57.5	0.0093231	1.62141
1422	357.524	70.3	21.4	0.104532			58.2	0.0083882	1.44127
1423	357.822	72	30.2	0.10078			59.5	0.0069499	1.16805
1424	358.12	74.8	43.8	0.0976267			55.7	0.00524	0.940754
1425	358.419	78	63.9	0.0968972			48.4706	0.0035973	0.742161
1426	358.717	75.1	-15.7	0.114757			67.0909	0.0075428	1.12427
1427	359.016	72.6	-5.3	0.117195			64.7059	0.0090948	1.40556
1428	359.314	70.9	-0.5	0.11859			62.7	0.010375	1.6547
1429	359.612	70.2	2.6	0.120506			65.1	0.01122	1.7235
1430	359.911	70.1	4.1	0.121068			65.5	0.011781	1.79863
1431	360.209	70.6	4.9	0.120952			65.8	0.012147	1.84605
1432	360.507	71.6	5.8	0.120259			66.8	0.012389	1.85464
1433	360.806	73.1	6.9	0.119393			68.3	0.01253	1.83455
1434	361.104	74.8	7.8	0.118587			69.8	0.012587	1.8033
1435	361.402	76.5	7	0.118281			70.8	0.012567	1.775
1436	361.701	77.8	3	0.118557			70.7	0.012491	1.76676
1437	361.999	78.8	0.1	0.119235			69.5	0.012385	1.78201
1438	362.297	79.3	-7.6	0.120744			68.1	0.012252	1.79912
1439	362.596	79.4	-14.8	0.122858			66.3	0.012136	1.83047
1440	362.894	79.2	-16.7	0.125085			65.3	0.012057	1.8464
1441	363.193	79.2	-11.5	0.126507			65.5	0.011998	1.83176
1442	363.491	79.1	-2.6	0.126732			66.3	0.011974	1.80603
1443	363.789	78.7	7.3	0.126218			67.5	0.011942	1.76919
1444	364.088	78.2	16.2	0.125536			69.9	0.011899	1.70229
1445	364.386	77.4	22.6	0.125269			71.2	0.011824	1.66067
1446	364.684	76.3	25.7	0.125274			67.5	0.011728	1.73748
1447	364.983	75.2	25.9	0.124639			64.2	0.011625	1.81075
1448	365.281	74.1	23.5	0.122843			64	0.011504	1.7975
1449	365.579	74	20.2	0.120235			65.7	0.011378	1.73181
1450	365.878	72.5	12.2	0.1176			66.7	0.011221	1.68231
1451	366.176	72	5.5	0.115327			64.3	0.011057	1.7196
1452	366.474	71.7	0.1	0.11266			61.1	0.010906	1.78494
1453	366.773	72.3	-4.2	0.11025			59.2	0.010749	1.81571
1454	367.071	72.6	-5.8	0.108328			59.3	0.010582	1.78449
1455	367.369	72.4	-4.1	0.107546			59.1	0.01041	1.76142
1456	367.668	73.3	-2.1	0.107636			57.5	0.010257	1.78383
1457	367.966	74.6	-0.2	0.108196			55.9	0.01012	1.81038
1458	368.265	76.1	1.6	0.108949			55.1	0.010024	1.81924
1459	368.563	77.3	2.9	0.10949			55.1	0.0099881	1.81272
1460	368.861	77.6	3	0.109287			55.6	0.01001	1.80036
1461	369.16	77.1	2.3	0.10885			55.1	0.010082	1.82976
1462	369.458	76	1.2	0.109194			54.3	0.010215	1.88122
1463	369.756	74.9	-0.2	0.11036			55	0.010388	1.88873
1464	370.055	74.2	-1.4	0.111929			55.9	0.010557	1.88855
1465	370.353	74	-2.2	0.113538			56.5	0.010708	1.89522
1466	370.651	73.8	-2.5	0.114937			57	0.010827	1.89947
1467	370.95	73.8	-1.9	0.116162			56.6	0.01089	1.92403
1468	371.248	73.8	-0.6	0.11732			55.8	0.010898	1.95305
1469	371.546	74	1.3	0.118008			54.9	0.010864	1.97887
1470	371.845	74.1	3.4	0.118001			53.4	0.010829	2.0279
1471	372.143	74.9	6.7	0.116627			52.4	0.010812	2.06336
1472	372.442	75.8	10.3	0.113998			53.3	0.010811	2.02833
1473	372.74	75.5	11.9	0.110588			53.7	0.010825	2.01583
1474	373.038	76.2	11.5	0.107015			52.6	0.010869	2.06635
1475	373.337	77	7.3	0.103978			52.1	0.010965	2.10461
1476	373.635	78.9	-1.3	0.101846			55	0.011095	2.01727
1477	373.933	79.3	-12.2	0.101335			63.4	0.011224	1.77035
1478	374.232	79.3	-21.5	0.102646			71.5	0.011321	1.58336
1479	374.53	78.4	-25.1	0.105273			66.4	0.01141	1.71837
1480	374.828	78.3	-24.3	0.107793			56.8	0.011495	2.02377
1481	375.127	78	-19.4	0.10997			55.8	0.011546	2.06918
1482	375.425	77	-11	0.111267			53.7	0.011523	2.14581
1483	375.723	76.2	-4.1	0.11139			46.8	0.011435	2.44338
1484	376.022	75.3	1.1	0.110569			42.6	0.01132	2.65728
1485	376.32	74.3	3.9	0.109405			40.6	0.011236	2.76749
1486	376.618	73.6	4.8	0.108356			40.2	0.011191	2.78383
1487	376.917	73.5	6.3	0.107648			40.7	0.011183	2.74767
1488	377.215	72.3	5	0.106817			41	0.011211	2.73439
1489	377.514	72	4.5	0.106146			41.3	0.011261	2.72663
1490	377.812	71.2	3.1	0.10568			40.7	0.011312	2.77936
1491	378.11	72	3.9	0.105695			39.6	0.011361	2.86894
1492	378.409	73.3	5.7	0.105964			38.5	0.011386	2.9574
1493	378.707	74	7.6	0.106103			37.4	0.011375	3.04144
1494	379.005	74.9	9.1	0.105692			36.5	0.011335	3.10548
1495	379.304	75.5	9.5	0.104986			35.3	0.011296	3.2
1496	379.602	76.4	8.3	0.103869			34.3	0.011286	3.29038
1497	379.9	77	5.1	0.102608			34.1	0.01132	3.31965
1498	380.199	77.4	0.5	0.101427			34.6	0.011391	3.2922
1499	380.497	78.2	-3.4	0.100812			35.2	0.011486	3.26307
1500	380.795	77.5	-8.1	0.10097			35	0.011608	3.31657
1501	381.094	77.7	-10.3	0.101392			34.4	0.011729	3.40959
1502	381.392	78.3	-11.2	0.101355			33.9	0.011826	3.4885
1503	381.691	79.3	-11.4	0.100291			33.6	0.011888	3.5381
1504	381.989	80.2	-10.8	0.0981221			33.3	0.011911	3.57688
1505	382.287	80.5	-9.6	0.0948778			32.9	0.011917	3.62219
1506	382.586	79.7	-7.8	0.0908781			32.4	0.011964	3.69259
1507	382.884	77.8	-6.1	0.0875122			32.6	0.012108	3.71411
1508	383.182	75.8	-4.8	0.085049			33.2	0.012349	3.71958
1509	383.481	75.6	-3.5	0.083448			34.6	0.012598	3.64104
1510	383.779	73.6	-3	0.0822208			36.5	0.012747	3.49233
1511	384.077	73.1	-3.1	0.0813427			37.8	0.012754	3.37407
1512	384.376	73.7	-4	0.0814083			38.1	0.01263	3.31496
1513	384.654	72.5	-4.6	0.0822568			37.4	0.012402	3.31604
1514	384.875	72.3	-4.8	0.0839773			36	0.012147	3.37417
1515	385.096	71.9	-4.4	0.0862122			35.1	0.011911	3.39345
1516	385.317	71.6	-2.8	0.0880981			35.6	0.011748	3.3
1517	385.539	71.4	-0.4	0.0890947			35.9	0.011716	3.26351
1518	385.76	71.5	1.8	0.0890734			36.4	0.011814	3.2456
1519	385.981	71.9	2.4	0.0882439			38.1	0.012005	3.15092
1520	386.202	72.5	0.4	0.0869265			40.1	0.012219	3.04713
1521	386.423	74.2	-2.7	0.0857081			39.6	0.012424	3.13737
1522	386.644	74.2	-7.9	0.0849265			37.8	0.012569	3.32513
1523	386.865	74.2	-11.7	0.0842984			36.9	0.012675	3.43496
1524	387.087	73.2	-15.1	0.0835963			36.8	0.012755	3.46603
1525	387.308	74.6	-13.2	0.0824926			36.3	0.012846	3.53884
1526	387.529	75.2	-11.7	0.0809497			36	0.012947	3.59639
1527	387.75	75.8	-8.5	0.0789971			37	0.01301	3.51622
1528	387.971	76.4	-7	0.0768984			38	0.012992	3.41895
1529	388.192	76.9	-6.2	0.0747092			36.6	0.012896	3.5235
1530	388.414	77.2	-6.1	0.0722946			34.8	0.01274	3.66092
1531	388.635	77.3	-6.9	0.0701884			33.8	0.012551	3.71331
1532	388.856	76.9	-7.3	0.0683644			33.4	0.012316	3.68743
1533	389.077	76.3	-7.9	0.0669121			33.4	0.012081	3.61707
1534	389.298	75.8	-8.6	0.0650517			32.9	0.01185	3.60182
1535	389.519	75.5	-9.6	0.0631848			32	0.011681	3.65031
1536	389.74	75.2	-10.8	0.0610737			32.3	0.011564	3.58019
1537	389.962	75.8	-13.1	0.0593526			32.9	0.011488	3.49179
1538	390.183	76.5	-16.4	0.0584506			33.4	0.011443	3.42605
1539	390.404	76.3	-17.1	0.0584153			33.6	0.011425	3.4003
1540	390.625	76	-16.6	0.0591553			34	0.011441	3.365
1541	390.846	75.6	-13.9	0.0601494			34.1	0.011481	3.36686
1542	391.067	74.2	-12.3	0.0609136			34.7	0.011502	3.3147
1543	391.289	74.4	-8.3	0.0611556			36	0.011461	3.18361
1544	391.51	75.8	-3.1	0.0610825			36.9	0.01133	3.07046
1545	391.731	74.6	1.1	0.0615934			36.9	0.011128	3.01572
1546	391.952	75.1	9.3	0.0626849			36.4	0.010902	2.99505
1547	392.173	73.7	18.3	0.0633616			36	0.010701	2.9725
1548	392.394	72	25.8	0.0627855			36.8	0.010531	2.86168
1549	392.615	70.9	29.9	0.0602114			38.5	0.010342	2.68623
1550	392.837	71.4	29.4	0.0561991			39.9	0.010095	2.53008
1551	393.058	73.1	23	0.0523416			39.6	0.0098954	2.49884
1552	393.279	74.3	11.2	0.0492762			38.4	0.0097773	2.54617
1553	393.5	74.2	-1.9	0.046934			38.6	0.0097657	2.52997
1554	393.721	73	-10.1	0.0455833			40.1	0.0098551	2.45763
1555	393.942	72.3	-13.4	0.0452351			38.3	0.010014	2.61462
1556	394.164	72.1	-12.9	0.0463821			34.9	0.01022	2.92837
1557	394.385	72.5	-9.4	0.0489143			33.3	0.010465	3.14264
1558	394.606	71.3	-5.2	0.052558			33.5	0.010692	3.19164
1559	394.827	70.5	-3.5	0.0569636			34.1	0.010886	3.19238
1560	395.048	70	-2.4	0.0614808			33.7	0.011061	3.2822
1561	395.269	70	-1.2	0.0649391			31.8	0.011238	3.53396
1562	395.49	70.4	-0.3	0.0673859			30	0.011382	3.794
1563	395.712	71.1	-0.2	0.0689145			30	0.011469	3.823
1564	395.933	71.8	-0.7	0.0699409			29.1	0.0115	3.95189
1565	396.154	72.6	-0.9	0.0707645			28.3	0.011485	4.0583
1566	396.375	73.6	-1.8	0.0712673			27.2	0.011436	4.20441
1567	396.618	74.1	-2.5	0.0713517			25.5	0.01136	4.4549
1568	396.875	74.7	-3.2	0.0708309			24	0.011246	4.68583
1569	397.131	75.4	-4.8	0.0698745			24.2	0.011065	4.57231
1570	397.387	75.6	-5.7	0.0687071			25.6	0.010768	4.20625
1571	397.643	76.7	-6.1	0.067402			25.1	0.01028	4.09562
1572	397.899	76.9	-1.1	0.0652114			23.2	0.0095722	4.12595
1573	398.156	77.6	7	0.0628636			21.6	0.0086007	3.98181
1574	398.412	79.7	16.8	0.060434			22.1	0.00727	3.28959
1575	398.668	77.6	-36.1	0.0576745			28.2353	0.0057224	2.02668
1576	398.924	76.8	-22.6	0.0595666			38.5455	0.0058605	1.52041
1577	399.18	76.3	-16	0.0619013			28.9412	0.0069007	2.38439
1578	399.437	75.3	-12.5	0.0647427			19.7	0.0075057	3.81
1579	399.693	75.5	-12.9	0.0676022			15.2	0.007729	5.08487
1580	399.949	76.1	-16	0.0711742			13.1	0.0076721	5.85656
1581	400.205	76.6	-19.8	0.0760585			12	0.0074549	6.21242
1582	400.461	77.1	-23.4	0.0817715			11.4	0.0071658	6.28579
1583	400.718	76	-23.1	0.0866291			11.3	0.0069115	6.11637
1584	400.974	74.8	-21.6	0.0893517			11.1	0.0067189	6.05306
1585	401.23	73.5	-20.3	0.0897573			10.7	0.0066043	6.17224
1586	401.486	72.8	-20.4	0.0888051			10.4	0.0065667	6.31413
1587	401.742	72.4	-21.9	0.0864884			10.2	0.0065806	6.45157
1588	401.999	72.6	-23.4	0.0829798			10.1	0.0066434	6.57762
1589	402.255	72.7	-22.6	0.0778351			10.2	0.0067751	6.64225
1590	402.511	74.3	-22.5	0.0716973			10.9	0.0069472	6.37358
1591	402.767	75.7	-19.2	0.0658003			12.2	0.0070792	5.80262
1592	403.023	77.2	-14.4	0.0623414			12.9	0.0070715	5.48178
1593	403.28	78.6	-9.5	0.0620394			12.7	0.0069073	5.43882
1594	403.536	79.4	-5.4	0.0653348			12.4	0.006604	5.32581
1595	403.792	79.1	-2.1	0.0725831			12	0.006157	5.13083
1596	404.048	78.1	0.1	0.0837634			10.9	0.0056701	5.20193
1597	404.304	76.2	3.9	0.0962786			9.7	0.0052061	5.36711
1598	404.561	73	7.5	0.108963			9.2	0.0048246	5.24413
1599	404.817	72.7	8.6	0.117624			9.8	0.0045427	4.63541
1600	405.073	73	9.2	0.123411			10.1	0.0043106	4.26792
1601	405.329	73.3	9.3	0.125831			9.8	0.00415	4.23469
1602	405.585	73.6	9.6	0.125919			10.3	0.0040563	3.93816
1603	405.842	73.7	10.2	0.125303			11.2	0.0040136	3.58357
1604	406.098	73.8	10.9	0.124679			11.5	0.003992	3.4713
1605	406.354	73.9	11.5	0.122875			11.5	0.0039811	3.46183
1606	406.61	74.2	11	0.119295			11.2	0.0040391	3.60634
1607	406.866	74.3	7.9	0.112397			11	0.0042471	3.861
1608	407.123	73.9	2.9	0.103534			11	0.0046623	4.23845
1609	407.379	72.9	-2.3	0.0940734			11.5	0.0052587	4.57278
1610	407.635	71.5	-5.3	0.0861006			12.3	0.0060085	4.88496
1611	407.891	70.4	-5.7	0.079817			13	0.0068203	5.24638
1612	408.147	70	-4.5	0.0753134			13.6	0.0075425	5.54596
1613	408.404	70.2	-3	0.0708621			14.2	0.0081104	5.71155
1614	408.66	70.9	-1.8	0.0674538			14.3	0.0084897	5.93685
1615	408.916	71.8	-1.6	0.0643751			14.1	0.0087372	6.1966
1616	409.172	72.5	-1.9	0.0618153			14.1	0.0089811	6.36957
1617	409.428	72.7	-1.8	0.059961			14.5	0.0092627	6.38807
1618	409.685	72.4	-1	0.0591579			14.8	0.0095325	6.44088
1619	409.941	71.6	0.2	0.058925			14.8	0.0097936	6.6173
1620	410.197	70.5	1.4	0.0593071			15	0.010083	6.722
1621	410.453	69.4	2.7	0.0598619			15.3	0.010417	6.8085
1622	410.709	68.6	4.3	0.0603482			15.7	0.010764	6.85605
1623	410.966	68	6.5	0.0610597			16.1	0.011047	6.86149
1624	411.222	67.7	9.2	0.0617484			16.4	0.011243	6.85549
1625	411.478	67.4	11.9	0.0620748			16.5	0.011396	6.90667
1626	411.734	67.3	13.9	0.0622307			16.5	0.011547	6.99818
1627	411.99	67.6	14.2	0.0618379			16.7	0.011708	7.01078
1628	412.246	68.2	12.6	0.0611204			17	0.01185	6.97059
1629	412.503	69.4	8.6	0.0603542			17.6	0.011946	6.7875
1630	412.759	70.9	3.1	0.059954			18	0.011962	6.64556
1631	413.015	72.2	-2.4	0.0601476			18.2	0.011926	6.55275
1632	413.271	73.4	-7.4	0.0609405			18.5	0.011848	6.40432
1633	413.527	74.1	-10.7	0.0622335			18.8	0.011755	6.25266
1634	413.784	74.6	-12	0.0636996			19	0.011698	6.15684
1635	414.04	74.7	-11.2	0.0652725			19	0.011702	6.15895
1636	414.296	75.3	-10.8	0.0665674			19.2	0.011762	6.12604
1637	414.552	74.6	-7.6	0.0674141			19.3	0.011865	6.14767
1638	414.808	74.2	-5.4	0.0676732			19.3	0.012017	6.22642
1639	415.065	73.7	-3.4	0.0674726			20.3	0.01223	6.02463
1640	415.321	73.4	-1.6	0.0669452			21.7	0.012421	5.72396
1641	415.577	73.6	-0.7	0.0663024			22.8	0.012555	5.50658
1642	415.833	73.8	0.3	0.0656827			23.2	0.012609	5.43491
1643	416.089	74.1	-0.1	0.0651262			22.9	0.012631	5.51572
1644	416.346	74.4	-2.1	0.0645134			22.7	0.012671	5.58194
1645	416.602	74.8	-6.9	0.0637657			23	0.012747	5.54217
1646	416.858	74.6	-10.8	0.0627169			23.5	0.012834	5.46128
1647	417.114	74.4	-14.7	0.0617366			24.3	0.012898	5.30782
1648	417.37	73.9	-16.6	0.0609494			25	0.012917	5.1668
1649	417.627	73.5	-18.9	0.0606719			25.2	0.012902	5.11984
1650	417.883	72.8	-18.9	0.0611031			25.5	0.012873	5.04824
1651	418.139	72.2	-18.4	0.0618736			25.6	0.012833	5.01289
1652	418.395	71.3	-17	0.0625347			25.4	0.012785	5.03346
1653	418.651	70.6	-14.9	0.0628923			25	0.012727	5.0908
1654	418.908	70	-12.2	0.0627733			24.9	0.012678	5.09157
1655	419.164	70.5	-11.2	0.0621075			25.4	0.012628	4.97165
1656	419.42	71	-10.6	0.0607122			25.5	0.012571	4.9298
1657	419.676	71.6	-11	0.0590283			25.4	0.012522	4.92992
1658	419.932	72.3	-13.4	0.0575297			25.7	0.01249	4.85992
1659	420.189	73.3	-17.1	0.0562454			26.1	0.012468	4.77701
1660	420.445	73.7	-17.8	0.0552299			26.4	0.012457	4.71856
1661	420.701	74.7	-17.9	0.0538182			26.3	0.012455	4.73574
1662	420.957	75.8	-16	0.0521223			26.8	0.012441	4.64216
1663	421.213	76.7	-12.2	0.0504442			27.5	0.012394	4.50691
1664	421.47	77.2	-7.2	0.049518			27.7	0.012299	4.44007
1665	421.726	77.1	-1.6	0.0496661			27.7	0.012181	4.39747
1666	421.982	77.6	-0.9	0.0512605			27.9	0.012062	4.3233
1667	422.238	77.9	-3.9	0.0546828			28.3	0.011966	4.22827
1668	422.494	78.2	-12.5	0.0594094			28	0.01195	4.26786
1669	422.751	77.5	-25.6	0.0662452			28	0.012077	4.31321
1670	423.007	75.3	-31.6	0.0750999			28.8	0.012396	4.30417
1671	423.263	73.1	-29.7	0.0854594			30.2	0.012833	4.24934
1672	423.519	71.6	-24.6	0.0952578			32.8	0.013279	4.04848
1673	423.775	71.1	-20.3	0.102508			35.8	0.013702	3.82737
1674	424.032	71	-16.8	0.105998			38	0.014057	3.69921
1675	424.288	70.9	-14.3	0.106764			38.7	0.014418	3.72558
1676	424.544	70.6	-13.6	0.105604			39.9	0.014768	3.70125
1677	424.8	70.3	-13.7	0.103759			45.1	0.015023	3.33104
1678	425.056	70.1	-13.4	0.101348			50	0.015117	3.0234
1679	425.313	70.1	-12.1	0.0985927			49.6	0.015032	3.03065
1680	425.569	70.4	-10.1	0.0956161			47.2	0.014821	3.14004
1681	425.825	70.6	-7.4	0.0927674			46.1	0.014524	3.15054
1682	426.081	71.2	-6.1	0.0902903			45.7	0.014173	3.10131
1683	426.337	71.7	-5.3	0.0882402			43.5	0.013789	3.16989
1684	426.594	72.1	-5.6	0.0875562			40.5	0.013411	3.31136
1685	426.85	72.3	-7	0.0876729			40.2	0.013018	3.23831
1686	427.106	72.3	-9.2	0.0889418			42.4	0.012621	2.97665
1687	427.362	72.2	-11.7	0.0913002			44.7	0.012233	2.73669
1688	427.618	72	-14	0.0940426			45	0.011931	2.65133
1689	427.875	71.8	-15.3	0.096808			43.8	0.011697	2.67055
1690	428.131	71.4	-15.3	0.0996596			43.5	0.011541	2.6531
1691	428.387	71.2	-15.2	0.102367			44.6	0.01145	2.56726
1692	428.628	71.2	-14.7	0.104838			46.8	0.0114	2.4359
1693	428.868	71.9	-14.7	0.106894			50.7	0.011344	2.23748
1694	429.109	71.9	-14.4	0.108142			58.6	0.01126	1.9215
1695	429.349	72.2	-15.5	0.108703			67.3	0.011135	1.65453
1696	429.59	72.4	-18.1	0.109217			71.8	0.011013	1.53384
1697	429.83	72.4	-21.6	0.110694			74	0.010902	1.47324
1698	430.071	72.7	-25	0.112952			75.9	0.010795	1.42227
1699	430.311	73.5	-27.9	0.114847			76.1	0.010701	1.40618
1700	430.552	74.3	-30	0.116323			74.5	0.010624	1.42604
1701	430.792	74.7	-31.8	0.117196			72.8	0.010573	1.45234
1702	431.033	74.4	-33.3	0.118327			70.3	0.010557	1.50171
1703	431.273	73.4	-34.3	0.120133			67.8	0.010577	1.56003
1704	431.514	72.2	-34.8	0.122379			67.7	0.010612	1.5675
1705	431.755	71.4	-34.7	0.124504			68.6	0.010632	1.54985
1706	431.995	71.4	-34	0.125541			68.5	0.010631	1.55197
1707	432.236	72.7	-31.9	0.124447			67.9	0.010605	1.56186
1708	432.476	75.4	-25.6	0.120401			68	0.010548	1.55118
1709	432.717	78.9	-7.8	0.114301			68.4	0.010463	1.52968
1710	432.957	79.9	23.4	0.107204			68.3	0.010352	1.51567
1711	433.198	75.4	57.4	0.100639			66	0.010229	1.54985
1712	433.438	67.7	70.3	0.096132			59.9	0.010107	1.68731
1713	433.679	61.7	71.8	0.0937286			52	0.0099866	1.9205
1714	433.919	57.7	68.5	0.0923987			45.7	0.0098792	2.16175
1715	434.16	57.4	62.1	0.091866			41.4	0.009797	2.36643
1716	434.4	63.1	50.4	0.0926197			39.4	0.0097594	2.47701
1717	434.641	65.1	41.4	0.0960287			41	0.0097399	2.37559
1718	434.881	68.5	31.4	0.102443			46.9	0.0096656	2.0609
1719	435.122	71.9	22.7	0.109579			55	0.0094853	1.7246
1720	435.362	73	17.6	0.116155			59	0.0091578	1.55217
1721	435.603	73.6	16.7	0.120358			59.6	0.0085961	1.4423
1722	435.844	74.4	18.5	0.122832			58.4	0.0078069	1.3368
1723	436.084	75.9	22.9	0.12397			55.5	0.0067006	1.20732
1724	436.325	78.1	30	0.124627			51.3	0.0053969	1.05203
1725	436.565	81.2	43.9	0.12531			51.6471	0.0039714	0.76895
1726	436.806	84.3	78.1	0.0763763			111.5	0.0065029	0.58322
1727	437.046	56.2	78.5	0.0891146			126	0.0077784	0.617333
1728	437.287	62.8	51.6	0.101794			94.3	0.0086832	0.920806
1729	437.527	62.2	34.3	0.109735			72.6	0.0092214	1.27017
1730	437.768	62.2	30.9	0.113894			64.2	0.0095357	1.48531
1731	438.008	63.4	29.9	0.114576			60.9	0.0096785	1.58924
1732	438.249	65.8	30	0.11367			59	0.0097222	1.64783
1733	438.489	68.6	29.8	0.112594			57.6	0.0096984	1.68375
1734	438.73	71.5	29	0.112485			56.7	0.0096276	1.69799
1735	438.97	73.2	31.8	0.113608			55.4	0.0095268	1.71964
1736	439.211	73.7	36.2	0.114862			52.9	0.0094211	1.78093
1737	439.451	73.5	40.6	0.115436			50.5	0.009366	1.85465
1738	439.692	73.3	43.8	0.114928			49.3	0.0093865	1.90396
1739	439.932	73.4	45.6	0.113889			49.9	0.0094728	1.89836
1740	440.173	74	47.4	0.112729			51.8	0.0095732	1.84811
1741	440.414	74.9	50.3	0.111508			53.6	0.0096458	1.79959
1742	440.654	75.5	51.8	0.110258			54.1	0.0096807	1.78941
1743	440.895	75.5	54.2	0.10881			53.4	0.0096841	1.8135
1744	441.135	75.1	54.1	0.107129			52.7	0.0096663	1.83421
1745	441.376	74.2	51.9	0.104673			52.1	0.0096282	1.84802
1746	441.616	73.1	49	0.101573			52	0.0095747	1.84129
1747	441.857	72.1	46.9	0.0981783			52.4	0.009522	1.81718
1748	442.097	71.3	45.5	0.0948018			53.3	0.0094761	1.77788
1749	442.338	70.7	44.1	0.0919103			54.7	0.0094533	1.72821
1750	442.578	70.2	42.4	0.090174			55.5	0.009448	1.70234
1751	442.819	69.8	40.5	0.0896372			54.9	0.0094542	1.72208
1752	443.059	69.4	38	0.0899701			54.4	0.0094546	1.73798
1753	443.3	69.2	35.1	0.0905615			54.5	0.0094306	1.73039
1754	443.54	69.1	31.4	0.0908353			54.3	0.0093713	1.72584
1755	443.781	69.1	27.9	0.0907903			53.5	0.0092892	1.7363
1756	444.021	69.1	25.5	0.0899424			52.8	0.0092082	1.74398
1757	444.262	69.1	24.9	0.0876963			52.7	0.0091352	1.73343
1758	444.502	69.4	25.5	0.0839793			52.3	0.0090864	1.73736
1759	444.743	69.9	25.8	0.0794991			51.1	0.0090773	1.77638
1760	444.984	70.6	24.1	0.0755361			50.2	0.0091369	1.8201
1761	445.224	71.2	20	0.0726986			50	0.0092743	1.85486
1762	445.465	71.7	10.7	0.0714263			50.7	0.009478	1.86943
1763	445.705	71.3	11	0.0719796			53.6	0.0097075	1.8111
1764	445.946	70.9	9.3	0.0737074			57.1	0.0098769	1.72975
1765	446.186	70.7	9.4	0.075739			58.6	0.0099422	1.69662
1766	446.427	70.8	9.9	0.0772576			58.4	0.0098974	1.69476
1767	446.667	71.2	10.7	0.077517			57.6	0.0097716	1.69646
1768	446.908	71.9	11.4	0.0770858			55.8	0.0096142	1.72297
1769	447.148	72.4	12.6	0.0757664			52.9	0.0094761	1.79132
1770	447.389	72.2	13.3	0.0740303			52.7	0.0093699	1.77797
1771	447.629	72.4	16.1	0.0726973			54.4	0.009302	1.70993
1772	447.87	72.5	18.8	0.0718587			53.8	0.0092841	1.72567
1773	448.11	73	22.1	0.0716161			52.2	0.0093322	1.78778
1774	448.351	73.4	22.4	0.0719415			52.9	0.0094422	1.78491
1775	448.591	74	23.4	0.0720269			55.8	0.0095841	1.71758
1776	448.832	76.1	24	0.0718826			58.7	0.0097325	1.65801
1777	449.072	76.1	26.9	0.0712423			57.9	0.0098693	1.70454
1778	449.313	75.8	30.8	0.0703053			55.4	0.010002	1.80542
1779	449.554	75.5	34.1	0.0694506			55.1	0.010128	1.83811
1780	449.794	75.1	35.8	0.0692111			54.6	0.010252	1.87766
1781	450.035	74.2	33.8	0.0699135			53.4	0.010389	1.94551
1782	450.275	74	33.7	0.0707456			53.1	0.010544	1.98569
1783	450.516	72.6	28.4	0.0716737			53.7	0.010739	1.99981
1784	450.756	71.9	26	0.0723584			54	0.010938	2.02556
1785	450.997	71.9	23.9	0.0728176			54.5	0.011133	2.04275
1786	451.237	71.5	21.2	0.0733934			55.4	0.011288	2.03755
1787	451.478	71.1	19.6	0.0742892			57.1	0.01139	1.99475
1788	451.718	69.9	20.2	0.0749122			59	0.01141	1.9339
1789	451.959	70.5	19.5	0.0747613			58.8	0.011362	1.93231
1790	452.199	69.8	19.6	0.0737384			56.8	0.011288	1.98732
1791	452.44	69.6	18.3	0.0718553			55.1	0.01125	2.04174
1792	452.68	69.7	17.7	0.070079			54.9	0.011287	2.05592
1793	452.921	70.1	16.1	0.0685229			54.7	0.011401	2.08428
1794	453.161	70.8	15.4	0.0668818			55.2	0.011555	2.0933
1795	453.402	71.3	16.9	0.0656087			58	0.011684	2.01448
1796	453.642	72.4	20.5	0.064869			60.5	0.011764	1.94446
1797	453.883	73.2	27.3	0.065642			60.2	0.011795	1.9593
1798	454.124	73.5	32.8	0.0694455			59.4	0.011766	1.98081
1799	454.364	73.9	36.9	0.0757231			59.1	0.011667	1.97411
1800	454.605	74.6	38.9	0.0831771			58.8	0.011492	1.95442
1801	454.845	74.7	38.2	0.0899128			58.4	0.011271	1.92997
1802	455.086	75.3	36.5	0.0960258			57.4	0.011045	1.92422
1803	455.326	76	34.9	0.101297			55.6	0.010888	1.95827
1804	455.567	76.6	34.1	0.104926			54.1	0.010842	2.00407
1805	455.807	77	33.5	0.107266			54.7	0.010894	1.99159
1806	456.048	77.3	32	0.108305			56.8	0.011007	1.93785
1807	456.288	77.2	29.5	0.108407			58.7	0.011134	1.89676
1808	456.529	76.8	26.9	0.107927			59.3	0.011271	1.90067
1809	456.769	75.8	25.9	0.106941			59.5	0.011408	1.91731
1810	457.01	75.2	25.5	0.104978			60.5	0.011523	1.90463
1811	457.25	74.9	26	0.101893			61.6	0.011634	1.88864
1812	457.491	75.1	26.7	0.0979189			62.9	0.011734	1.8655
1813	457.731	76	25.2	0.0933896			65.3	0.011815	1.80934
1814	457.972	76	25.3	0.0883943			66.8	0.0119	1.78144
1815	458.213	76.4	24.5	0.0833772			66.5	0.012018	1.80722
1816	458.453	76.3	23.1	0.079094			66.5	0.01218	1.83158
1817	458.694	75.9	21.1	0.0756869			69.3	0.012369	1.78485
1818	458.934	74.2	20.4	0.0732112			72.8	0.012554	1.72445
1819	459.175	72.4	18.7	0.0717216			75.1	0.012722	1.69401
1820	459.415	70.5	17.3	0.0716112			76.9	0.012865	1.67295
1821	459.656	68.9	14.8	0.0726196			78.7	0.012957	1.64638
1822	459.896	68.6	15.2	0.073825			79.7	0.012983	1.62898
1823	460.137	69.5	16.8	0.0745899			75	0.012982	1.73093
1824	460.377	71	20.1	0.0747489			69.7	0.012989	1.86356
1825	460.618	72.1	22.7	0.0747816			67.3	0.013008	1.93284
1826	460.858	72.8	24.1	0.0751573			65.6	0.013006	1.98262
1827	461.099	72.7	23.6	0.0756118			63.4	0.01294	2.04101
1828	461.339	72.9	25	0.0760321			60.6	0.012783	2.10941
1829	461.58	72.9	25.8	0.0760105			58.1	0.01253	2.15663
1830	461.82	72.9	26.5	0.0756242			56.9	0.012175	2.13972
1831	462.061	73.6	26.6	0.0755217			55.5	0.011744	2.11604
1832	462.301	74.6	26.4	0.076335			52.1	0.01127	2.16315
1833	462.542	75.5	26.1	0.0778051			46.5	0.010854	2.33419
1834	462.783	75.9	26.6	0.08007			40.9	0.01064	2.60147
1835	463.023	75.8	27.3	0.0820244			37.2	0.010636	2.85914
1836	463.264	75.7	27.8	0.0828742			38.3	0.010771	2.81227
1837	463.504	75.4	27.9	0.0821892			44.6	0.010942	2.45336
1838	463.745	75.7	27.5	0.0802447			52.3	0.011094	2.12122
1839	463.985	76.3	26	0.0777959			57.6	0.011219	1.94774
1840	464.226	76.7	23.4	0.0753653			59.6	0.011305	1.89681
1841	464.466	77	21.2	0.0736189			60.3	0.011368	1.88524
1842	464.707	76.3	19.1	0.0728251			61	0.011425	1.87295
1843	464.947	75.4	18.6	0.0728974			60.7	0.011487	1.89242
1844	465.188	74.5	20	0.0735298			59	0.011575	1.96186
1845	465.428	73.7	22.6	0.0746396			57.6	0.011671	2.02622
1846	465.669	73.5	25.6	0.0751771			57.6	0.011758	2.04132
1847	465.909	73.7	27.1	0.0750792			57.5	0.011821	2.05583
1848	466.15	74.2	26.1	0.0744066			56.8	0.011876	2.09085
1849	466.39	75	22.3	0.0741164			57.2	0.011946	2.08846
1850	466.631	75.5	17.4	0.0752266			58.7	0.012046	2.05213
1851	466.871	75.7	14.1	0.0782616			58.9	0.012176	2.06723
1852	467.112	75.5	14.2	0.0830241			57.6	0.01231	2.13715
1853	467.353	74.1	16.4	0.0882831			54.1	0.012408	2.29353
1854	467.593	73.3	19.6	0.0931972			50	0.012454	2.4908
1855	467.834	73.1	21.9	0.097184			46.7	0.012442	2.66424
1856	468.074	73.2	23.5	0.100296			45	0.012378	2.75067
1857	468.315	73.6	23.9	0.102967			43.6	0.01226	2.81193
1858	468.555	74.2	23.1	0.105068			41.9	0.012091	2.88568
1859	468.796	74.9	22.4	0.106805			42.1	0.011854	2.81568
1860	469.036	75.3	21	0.107911			45.4	0.011575	2.54956
1861	469.277	75.4	19.1	0.108088			49.3	0.011321	2.29635
1862	469.517	75.7	19.1	0.10748			51.4	0.011117	2.16284
1863	469.758	75.7	18.5	0.106255			51.8	0.010985	2.12066
1864	469.998	75.5	17.9	0.104839			50.3	0.010959	2.17873
1865	470.239	74.9	17.7	0.103475			49.3	0.011051	2.24158
1866	470.479	73.7	18.9	0.10258			49.8	0.011225	2.25402
1867	470.72	72.3	21.2	0.102718			50.7	0.011405	2.24951
1868	470.96	70.7	24.9	0.103703			51.6	0.011473	2.22345
1869	471.201	69.8	24.9	0.105366			53.1	0.011343	2.13616
1870	471.441	69.6	25.5	0.107343			54.4	0.010977	2.01783
1871	471.682	70.1	25.3	0.109725			53.8	0.01037	1.92751
1872	471.923	70.9	25.3	0.113848			51.5	0.0095708	1.85841
1873	472.163	72.4	27.2	0.119548			47.9	0.0086051	1.79647
1874	472.404	74.4	31.6	0.128015			44.4	0.0073493	1.65525
1875	472.644	78.4	47.1	0.13949			42.4	0.0058022	1.36844
1876	472.885	75.9	-16.3	0.101343			40.1818	0.006345	1.57907
1877	473.125	74.5	-0.9	0.100747			40.7059	0.0077602	1.90641
1878	473.366	73.4	10.1	0.0978371			41.1	0.0087292	2.12389
1879	473.606	73	18.2	0.0946005			43.5	0.009326	2.14391
1880	473.847	73.4	23.1	0.0907793			43.3	0.0096848	2.23667
1881	474.087	74.6	25.3	0.087893			43	0.0098932	2.30074
1882	474.328	76.3	25.9	0.0864698			42.4	0.010077	2.37665
1883	474.568	77.4	24.4	0.0869114			41	0.010318	2.51659
1884	474.809	77.5	22.7	0.0879567			40.8	0.01064	2.60784
1885	475.049	78.1	22.1	0.0897082			43.3	0.010983	2.53649
1886	475.29	76.8	23.7	0.0909056			45.4	0.011307	2.49053
1887	475.53	75.7	24.7	0.0914929			44.9	0.011615	2.58686
1888	475.771	74.4	25.5	0.0912836			44.3	0.011901	2.68646
1889	476.012	73.4	23.4	0.0906184			45.6	0.012117	2.65724
1890	476.252	72.7	19.9	0.0893138			46.8	0.012251	2.61774
1891	476.493	71.9	14.4	0.0876259			48	0.012226	2.54708
1892	476.733	71.4	12.1	0.085762			49.3	0.011986	2.43124
1893	476.974	70.6	10.1	0.083428			49.8	0.011465	2.30221
1894	477.214	69.5	12	0.0809275			48.9	0.010553	2.15808
1895	477.455	68.1	17.7	0.0775883			46.1	0.0092597	2.00861
1896	477.695	66.7	25.4	0.0753762			40.9	0.0078073	1.90888
1897	477.936	78.4	-51.6	0.0996644			7.3	0.0042175	5.7774
1898	478.176	79.8	-43	0.100697			14.2	0.0056361	3.96908
1899	478.417	79.2	-33.6	0.101951			23.5	0.0069923	2.97545
1900	478.657	80.4	-17.5	0.102856			31.7	0.0080526	2.54025
1901	478.898	80.2	-6.6	0.103629			36.1	0.0089051	2.46679
1902	479.138	80.5	2	0.10456			36	0.0095136	2.64267
1903	479.379	79.4	3.8	0.105521			35.4	0.0099877	2.82138
1904	479.619	77	2.3	0.105639			35.3	0.010402	2.94674
1905	479.86	74.8	2.1	0.105186			34.9	0.010739	3.07708
1906	480.1	73.3	2.6	0.104334			34	0.010996	3.23412
1907	480.341	71.4	4.3	0.103064			33.7	0.011138	3.30504
1908	480.582	71.3	4.2	0.101222			33.9	0.011181	3.29823
1909	480.822	71	4.9	0.0990285			33	0.011157	3.38091
1910	481.063	71.1	5.8	0.0965881			31.6	0.011092	3.51013
1911	481.303	71.9	6.8	0.094056			31.1	0.011015	3.5418
1912	481.544	71.5	9.1	0.0912455			31.3	0.010955	3.5
1913	481.803	71.7	11.6	0.0882344			30	0.01096	3.65333
1914	482.1	72.1	14.4	0.0851615			27.4	0.011075	4.04197
1915	482.398	72.6	17.3	0.0823516			25.3	0.011316	4.47273
1916	482.696	73	19.7	0.0800082			24.5	0.011646	4.75347
1917	482.993	73.3	21	0.0782588			25.2	0.012015	4.76786
1918	483.291	73.2	20.5	0.0768184			27.3	0.012331	4.51685
1919	483.589	72.9	18.1	0.0761062			29.2	0.012593	4.31267
1920	483.886	73.3	14.7	0.0761613			28.9	0.012772	4.41938
1921	484.184	74.6	11.7	0.0773116			27.1	0.012858	4.74465
1922	484.482	75.6	8.2	0.079599			25	0.0129	5.16
1923	484.779	75.9	5.9	0.0828191			23.5	0.012945	5.50851
1924	485.077	76.1	5.8	0.0867476			23	0.013037	5.66826
1925	485.375	75.8	6.1	0.0904843			23	0.013173	5.72739
1926	485.672	74.9	5.4	0.0939731			23.5	0.013324	5.66979
1927	485.97	74.8	3.8	0.0968205			24.3	0.013455	5.53704
1928	486.268	73.9	0.8	0.0991207			25.2	0.013554	5.37857
1929	486.565	74.1	-1.8	0.10114			26	0.013626	5.24077
1930	486.863	74.7	-5.4	0.103267			25.8	0.013658	5.2938
1931	487.161	75	-7.7	0.105463			25.3	0.01365	5.39526
1932	487.458	75.2	-8.2	0.107749			24.8	0.013612	5.48871
1933	487.756	75.2	-6.1	0.109882			24.1	0.013571	5.63112
1934	488.054	75.1	-1.4	0.111757			23.7	0.013543	5.71435
1935	488.352	74.5	5	0.113231			24	0.013514	5.63083
1936	488.649	73.9	11.3	0.114039			24.4	0.013461	5.5168
1937	488.947	73.3	15.8	0.113899			24.4	0.013387	5.48648
1938	489.245	72.9	18.1	0.112727			24.5	0.0133	5.42857
1939	489.542	72.4	18.6	0.111101			24.4	0.013215	5.41598
1940	489.84	72	18.4	0.108938			24.3	0.013146	5.40988
1941	490.138	71.5	18.4	0.106161			24.5	0.013103	5.34816
1942	490.435	71.1	18.9	0.102526			24.6	0.013099	5.3248
1943	490.733	70.4	19.6	0.0975105			24.7	0.013136	5.31822
1944	491.031	70.9	20	0.0914859			25.3	0.013193	5.21462
1945	491.328	71.5	20.3	0.0856634			26.1	0.013253	5.07778
1946	491.626	71.5	20.1	0.0801548			26.6	0.013299	4.99962
1947	491.924	71.9	20	0.0752621			26.7	0.013313	4.98614
1948	492.221	72.2	19.9	0.0709598			26.9	0.013258	4.92862
1949	492.519	72.4	19.9	0.0673899			27.4	0.013106	4.78321
1950	492.817	73.1	19.6	0.0641159			27.7	0.012882	4.65054
1951	493.114	74.6	18.6	0.0612353			27.1	0.012634	4.66199
1952	493.412	76.2	15.9	0.0589165			26.6	0.012395	4.65977
1953	493.71	76.7	12.2	0.0571421			26.5	0.012177	4.59509
1954	494.007	77.1	7.1	0.0558825			26.4	0.012037	4.55947
1955	494.305	77.1	2.8	0.0550521			26.9	0.012003	4.46208
1956	494.603	77.1	0.6	0.0547298			27.8	0.012064	4.33957
1957	494.9	77.6	1.3	0.0547039			27.7	0.012233	4.41625
1958	495.198	77.1	7.1	0.0547306			27.6	0.012525	4.53804
1959	495.496	76.5	13.6	0.0549335			29	0.012928	4.45793
1960	495.794	75.5	19.1	0.0552177			31	0.01341	4.32581
1961	496.091	75.2	21.3	0.0555185			33.3	0.01389	4.17117
1962	496.389	73.7	22.3	0.0559198			36.1	0.014262	3.95069
1963	496.687	73.2	22	0.0563137			37.7	0.014497	3.84536
1964	496.984	73	22.5	0.0566542			36.9	0.014621	3.96233
1965	497.282	73	24	0.0570869			35.7	0.01466	4.10644
1966	497.58	72.5	26.4	0.0574263			34.5	0.014639	4.24319
1967	497.877	72.9	27.8	0.0576738			33.3	0.014588	4.38078
1968	498.175	72.2	28.1	0.0579213			32.5	0.014527	4.46985
1969	498.473	72.1	26.9	0.0584807			32.3	0.014452	4.4743
1970	498.77	71.5	24.7	0.0593608			32.2	0.01433	4.45031
1971	499.068	70.5	23.4	0.0603182			32	0.014152	4.4225
1972	499.366	71.3	21.7	0.0612843			31.8	0.013919	4.37704
1973	499.663	72.3	22.2	0.0621599			31.4	0.013682	4.35732
1974	499.961	74.4	24.4	0.063183			30.5	0.013464	4.41443
1975	500.259	75.6	26.6	0.0646053			30.2	0.013266	4.39272
1976	500.556	76.7	27.5	0.0664125			30.6	0.013093	4.27876
1977	500.854	77.2	25.2	0.0685635			31.1	0.012938	4.16013
1978	501.152	77.1	19.7	0.0708289			31.4	0.012787	4.07229
1979	501.449	77.3	13.5	0.0727079			31.2	0.01263	4.04808
1980	501.747	77	6.8	0.0738474			31	0.012436	4.01161
1981	502.045	77.3	1.9	0.0744966			30.7	0.012203	3.97492
1982	502.343	77	0.7	0.0749875			30.2	0.011973	3.96457
1983	502.64	79.3	7.5	0.0750114			29.8	0.011761	3.94664
1984	502.938	81	23.4	0.0746073			29.3	0.011536	3.9372
1985	503.236	80.7	43.9	0.0740278			29.8	0.011281	3.78557
1986	503.533	79.7	52.8	0.0736345			31.2	0.011009	3.52853
1987	503.831	79.4	44	0.0733746			32.8	0.010878	3.31646
1988	504.129	78.4	21.5	0.0739975			32.9	0.010983	3.3383
1989	504.426	75.6	1.1	0.0760627			30.9	0.011304	3.65825
1990	504.724	72.4	-6.6	0.079409			29.6	0.011708	3.95541
1991	505.022	71	-11.9	0.0822295			30.5	0.012085	3.9623
1992	505.319	70.9	-14.3	0.0837012			33.3	0.012329	3.7024
1993	505.617	71.3	-14.7	0.0846186			38	0.012397	3.26237
1994	505.915	71.9	-12.9	0.0862201			44.9	0.01231	2.74165
1995	506.212	72.2	-8.8	0.0889054			47.5	0.012137	2.55516
1996	506.51	71.9	-3.7	0.0920712			42.4	0.011945	2.81722
1997	506.808	71.7	-0.4	0.0951707			38.8	0.011782	3.0366
1998	507.105	70.6	3.4	0.0982567			36.9	0.011705	3.17209
[truncated: 3,278 more rows]

## Sheet: non-magnetic data
XRF										Diatom				Opal
Depth (cm)	Age (ka)	Ti (counts)	Mn (counts)	Fe (counts)	Fe/Ti	Mn/Ti	log(Fe/Ti)	log(Mn/Ti)		Depth (cm)	Age (ka)	Sea ice assemblage (%)		Age (ka)	Sedi. rate (cm/kyr)	Opal AR (g/cm^2 kyr)
234.8	24.7403	5361	5543	238700	44.5253	1.03395	1.64861	0.0144991		3	0.46	3.94089		4
235	24.7931	5607	5317	237801	42.4114	0.948279	1.62748	-0.0230639		13	1.99333	3.44828		6	21.978	14.1336
235.2	24.8458	5558	5702	232167	41.7717	1.02591	1.62088	0.0111087		23	3.52667	3.75723		8	21.978	10.5657
235.4	24.8986	5346	6196	234805	43.9216	1.159	1.64268	0.0640825		33	5.06	0.990099		10	53.5714	17.6754
235.6	24.9513	5415	6493	235367	43.4657	1.19908	1.63815	0.0788469		43	5.515	0.497512		12	5.57851	0.634745
235.8	25.0041	5614	5926	232958	41.4959	1.05558	1.61801	0.0234892		53	5.97	3.25581		14	5.57851	1.24199
236	25.0568	5313	5342	230290	43.3446	1.00546	1.63694	0.00236407		63	6.425	5.41872		16	9.7561	0.773652
236.2	25.1096	5357	5139	230758	43.076	0.959306	1.63424	-0.018043		73	6.88	0.49505		18	3.79185	0
236.4	25.1623	5086	4720	220277	43.3105	0.928038	1.63659	-0.0324344		83	7.335	2.01005		20	3.79185	0
236.6	25.215	5401	4741	228887	42.3786	0.8778	1.62715	-0.0566042		93	7.79	3.36538		22	3.79185	0.0526342
236.8	25.2678	5481	4936	226967	41.4098	0.900566	1.6171	-0.0454847		103	8.245	0		24	3.79185	0.31014
237	25.3205	5407	4843	224766	41.5694	0.895691	1.61877	-0.0478419		113	8.7	6.37255		26	3.79185	0.0464487
237.2	25.3733	5648	4968	223004	39.4837	0.879603	1.59642	-0.0557131		123	8.88667	10.6796		28	3.79185	0.032524
237.4	25.426	5499	5081	228820	41.6112	0.923986	1.61921	-0.0343345		133	9.07333	8.91089		30	3.79185	0.72459
237.6	25.4788	5257	5255	230528	43.8516	0.99962	1.64199	-0.000165257		143	9.26	5.76923		32	3.79185	1.11222
237.8	25.5315	5521	4790	231354	41.9044	0.867596	1.62226	-0.0616822		150	10.5148	3.33333		34	3.79185	0.587697
238	25.5843	5570	4891	231901	41.6339	0.878097	1.61945	-0.0564575		160	12.3074	6.09137		36	3.63926	0.147499
238.2	25.637	5265	5342	233977	44.4401	1.01462	1.64777	0.00630551		170	14.1	7.5		38	3.63926	0.382914
238.4	25.6897	5369	5198	230197	42.8752	0.96815	1.63221	-0.0140571		180	15.125	4.66667		40	3.63926	0.876041
238.6	25.7425	5274	5325	232254	44.0375	1.00967	1.64382	0.00417949		190	16.15	7.31707		42	3.63926	0.931472
238.8	25.7952	5497	5190	237619	43.227	0.944151	1.63576	-0.0249584		200	17.175	13		44	3.63926	0.786384
239	25.848	5508	5286	232537	42.218	0.959695	1.6255	-0.0178668		210	18.2	13.7931		46	3.63926	1.64547
239.2	25.9007	5331	5290	236447	44.3532	0.992309	1.64693	-0.00335301		220	20.8372	17		48	3.63926	1.42737
239.4	25.9535	5395	5279	234717	43.5064	0.978499	1.63855	-0.00943979		230	23.4745	20		50	3.63926	0.655303
239.6	26.0062	5501	5508	234331	42.5979	1.00127	1.62939	0.000552287		237	25.3205	19.5		52	3.63926	0.330221
239.8	26.059	5490	7129	232095	42.276	1.29854	1.62609	0.113456		247	27.9578	11.5		54	3.63926	0.430193
240	26.1117	5408	6278	237359	43.8903	1.16087	1.64237	0.0647846		257	30.595	8.5		56	3.63926	0.392199
240.2	26.1644	5656	5332	237476	41.9866	0.942716	1.62311	-0.0256193		267	33.2322	0		58	3.63926	0.160212
240.4	26.2172	5485	6078	236791	43.1706	1.10811	1.63519	0.0445841		278	36.165	3.5		60	3.63926	0.00246332
240.6	26.2699	5706	5963	236453	41.4394	1.04504	1.61741	0.019133		287	38.638	3		62	3.63926	0
240.8	26.3227	5440	6178	241532	44.3993	1.13566	1.64738	0.055249		297	41.3858	1		64	3.63926	0.00724419
241	26.3754	5308	5639	240744	45.3549	1.06236	1.65662	0.0262712		307	44.1336	2.48756		66	3.63926	0.39486
241.2	26.4282	5311	5393	238762	44.9561	1.01544	1.65279	0.00665412		317	46.8814	3		68	3.63926	0.113068
241.4	26.4809	5405	6192	236592	43.7728	1.14561	1.6412	0.0590352		327	49.6292	2.5		70	3.63926	1.52319
241.6	26.5337	5459	5749	240138	43.9894	1.05312	1.64335	0.0224792		337	52.3771	4.25		72	2.75801	1.47798
241.8	26.5864	5305	5972	243879	45.9715	1.12573	1.66249	0.0514344		347	55.1249	2		74	2.75801	0.189474
242	26.6391	4975	8764	241075	48.4573	1.76161	1.68536	0.245909		357	57.8727	3.9801		76	2.75801	0.539412
242.2	26.6919	5120	6107	239496	46.7766	1.19277	1.67003	0.076558		367	60.6205	8.41584		78	2.75801	0.602234
242.4	26.7446	5262	7668	262748	49.9331	1.45724	1.69839	0.163531		377	63.3683	20		80	2.75801	0.102998
242.6	26.7974	5476	7686	273737	49.9885	1.40358	1.69887	0.147237		387	66.1161	16.6667		82	2.75801	0.782973
242.8	26.8501	4324	6391	218788	50.5985	1.47803	1.70414	0.169683		397	68.8639	5.97015		84	2.75801	1.13361
243	26.9029	4504	5131	206827	45.9207	1.13921	1.66201	0.0566036		407	71.6937	3.46535		86	2.75801	0.811472
243.2	26.9556	4204	4362	197963	47.0892	1.03758	1.67292	0.016023		417	75.3195	3.5		88	2.75801	1.16144
243.4	27.0084	4675	4083	206872	44.2507	0.873369	1.64592	-0.0588022		427	78.9453	5		90	2.75801	0.320833
243.6	27.0611	4724	3937	212399	44.9617	0.833404	1.65284	-0.0791445		437	82.5711	4		92	4.17281	0.561691
243.8	27.1139	5013	4452	217303	43.3479	0.888091	1.63697	-0.0515425		447	86.1969	3.9801		94	4.17281	2.0296
244	27.1666	5195	4778	225983	43.5001	0.919731	1.63849	-0.0363394		457	89.8228	0.995025		96	4.17281	1.71577
244.2	27.2193	5324	4741	231877	43.5532	0.890496	1.63902	-0.0503681		467	92.7576	2		98	4.17281	2.18709
244.4	27.2721	5589	4682	231798	41.474	0.837717	1.61778	-0.0769027		477	95.154	2		100	4.17281	1.81566
244.6	27.3248	5294	4274	230366	43.5145	0.807329	1.63863	-0.0929494		487	97.5505	3		102	4.17281	1.28279
244.8	27.3776	5418	4851	237025	43.7477	0.895349	1.64096	-0.0480077		497	99.947	3.9801		104	4.17281	1.62289
245	27.4303	5566	4804	238417	42.8345	0.863097	1.63179	-0.0639402		507	102.343	1.5		106	4.17281	1.12705
245.2	27.4831	5497	4524	231495	42.113	0.822994	1.62442	-0.0846031		517	104.74	7		108	2.63626	1.20679
245.4	27.5358	5520	5312	234340	42.4529	0.962319	1.62791	-0.016681		527	107.754	2.46305		110	2.63626	0.822803
245.6	27.5886	5466	12964	231279	42.3123	2.37175	1.62647	0.375069		537	111.548	3.9604		112	2.63626	1.33301
245.8	27.6413	5637	7712	238244	42.2643	1.3681	1.62597	0.136119		547	115.341	7		114	2.63626	2.22432
246	27.694	5470	6685	232226	42.4545	1.22212	1.62792	0.0871141		557	117.306	1.49254		116	2.63626	2.32172
246.2	27.7468	5462	5807	229257	41.9731	1.06316	1.62297	0.0266001		567	118.665	4		118	7.35855	7.92943
246.4	27.7995	5256	4764	227419	43.2685	0.906393	1.63617	-0.0426836		577	120.024	4.25		120	7.35855	7.22769
246.6	27.8523	5715	5300	231209	40.4565	0.927384	1.60699	-0.0327404		587	121.383	2.25		122	7.35855	5.88602
246.8	27.905	4923	4537	217763	44.2338	0.921593	1.64575	-0.0354611		597	122.742	2.75		124	7.35855	3.61075
247	27.9578	5258	6067	216128	41.1046	1.15386	1.61389	0.0621534		607	124.101	5.5		126	7.35855	2.19055
247.2	28.0105	5260	5434	216593	41.1774	1.03308	1.61466	0.0141339		617	125.46	4.5		128	7.35855	1.4792
247.4	28.0633	5214	5162	225307	43.2119	0.990027	1.6356	-0.00435303		627	126.819	2.45098		130	7.35855	1.35855
247.6	28.116	5321	5151	227870	42.8247	0.968051	1.63169	-0.0141017		637	128.178	3		132	7.35855	0.951732
247.8	28.1687	5264	4498	224797	42.7046	0.854483	1.63047	-0.0682964		647	129.537	3.5		134	3.88906	0.418107
248	28.2215	5451	7097	224976	41.2724	1.30196	1.61566	0.114599		657	130.896	4.47761		136	3.88906	0.633124
248.2	28.2742	5385	5303	232884	43.2468	0.984773	1.63595	-0.00666408		667	132.255	12.5		138	3.88906	0.368095
248.4	28.327	5363	4654	230062	42.898	0.867798	1.63244	-0.0615814		677	134.343	5.5		140	3.88906	0.0875776
248.6	28.3797	5424	4872	225844	41.6379	0.89823	1.61949	-0.0466124		679	134.857	0		142	3.88906	0.163031
248.8	28.4325	5191	4646	229195	44.1524	0.895011	1.64495	-0.0481718		689	137.428	4		144	3.88906	0.805128
249	28.4852	5478	4838	229848	41.9584	0.883169	1.62282	-0.0539562		699	140	5		146	3.88906	0.555021
249.2	28.538	5384	4011	228949	42.524	0.744985	1.62863	-0.127852		709	142.571	8.5		148	3.88906	0
249.4	28.5907	5443	4729	226921	41.6904	0.868822	1.62004	-0.061069		719	145.142	10		150	3.88906	0.428482
249.6	28.6434	5245	4843	226155	43.1182	0.923356	1.63466	-0.034631		729	147.713	6.96517		152	3.88906	0.62308
249.8	28.6962	5318	4172	221218	41.598	0.784505	1.61907	-0.105404		739	150.285	4		154	3.88906	0.0929295
250	28.7489	5287	4018	223777	42.3259	0.759977	1.62661	-0.119199		749	152.856	2.48756		156	3.88906	0.102057
250.2	28.8017	5095	4968	224436	44.0502	0.975074	1.64395	-0.0109626		759	155.427	12.9353		158	3.88906	0.0593587
250.4	28.8544	4976	4254	220655	44.3439	0.854904	1.64683	-0.0680829		769	157.999	0.5		160	3.88906	0.033792
250.6	28.9072	5173	4270	217726	42.0889	0.82544	1.62417	-0.0833146		779	160.57	15.8416		162	3.88906	0.155795
250.8	28.9599	5200	4410	225528	43.3708	0.848077	1.6372	-0.0715648		789	163.141	9.45274		164	3.88906	0.271784
251	29.0127	5170	4561	224715	43.4652	0.882205	1.63814	-0.0544305		799	165.774	3.9604		166	3.88906	0.45543
251.2	29.0654	5421	4410	230135	42.4525	0.813503	1.6279	-0.0896408		809	169.169	12.1951		168	2.9451	0.353406
251.4	29.1181	5572	5183	231843	41.6086	0.930187	1.61918	-0.0314299		819	172.565	1.66667		170	2.9451	0.0312157
251.6	29.1709	5654	5528	232478	41.1174	0.977715	1.61403	-0.00978777		828	175.621	6.45161		172	2.9451	0
251.8	29.2236	5366	4454	228041	42.4974	0.830041	1.62836	-0.0809005		838	179.326	12.5		174	2.9451	0
252	29.2764	5183	4360	223841	43.1875	0.841212	1.63536	-0.0750947		848	183.146	11.7647		176	2.9451	0
252.2	29.3291	5541	4488	223245	40.2897	0.809962	1.60519	-0.0915353		858	186.967	5.55556		178	2.61755	0.11837
252.4	29.3819	5366	4012	229808	42.8267	0.747671	1.63171	-0.12629		868	190.787	6.96517		180	2.61755	0.276275
252.6	29.4346	5752	4256	242308	42.1259	0.739917	1.62455	-0.130817		878	194.433	3		182	2.61755	0.54521
252.8	29.4874	5674	4269	231551	40.8091	0.752379	1.61076	-0.123563		888	197.968	1		184	2.61755	0.779559
253	29.5401	5101	4288	225163	44.141	0.840619	1.64484	-0.0754005		898	201.502	2.5		186	2.61755	0.508092
253.2	29.5929	5159	5206	221251	42.8864	1.00911	1.63232	0.00393864		908	205.036	4.5		188	2.61755	0.331387
253.4	29.6456	5108	5251	213551	41.8072	1.028	1.62125	0.0119911		918	208.57	4		190	2.61755	0.0211449
253.6	29.6983	5290	5674	215961	40.8244	1.07259	1.61092	0.0304337		928	212.105	3		192	2.61755	0.00781182
253.8	29.7511	5213	4950	218494	41.9133	0.949549	1.62235	-0.0224825		938	215.639	2.75		194	2.82944	0.363996
254	29.8038	4855	4829	215307	44.3475	0.994645	1.64687	-0.00233203		948	219.173	4.75		196	2.82944	0.279705
254.2	29.8566	4740	4338	217384	45.8616	0.91519	1.66145	-0.0384888		958	221.973	11.25		198	2.82944	1.4635
254.4	29.9093	4974	4563	215521	43.3295	0.91737	1.63678	-0.0374553		968	224.55	26.3158		200	2.82944	1.0406
254.6	29.9621	4837	4972	215028	44.4548	1.02791	1.64792	0.011955		978	227.128	8.29268		202	2.82944	1.30537
254.8	30.0148	5027	4199	213096	42.3903	0.835289	1.62727	-0.078163		988	229.706	6.5		204	2.82944	1.24481
255	30.0676	4904	4054	212335	43.2983	0.826672	1.63647	-0.0826667		998	232.283	2.98507		206	2.82944	0.932461
255.2	30.1203	4775	4683	216215	45.2806	0.980733	1.65591	-0.00844922		1008	235.479	2.34742		208	2.82944	0.520065
255.4	30.173	4943	4448	219418	44.3896	0.899858	1.64728	-0.0458258		1018	239.284	3.46535		210	2.82944	0.870753
255.6	30.2258	5198	4619	224249	43.1414	0.888611	1.63489	-0.0512883		1028	243.089	8.5		212	2.82944	1.00263
255.8	30.2785	5022	4265	223119	44.4283	0.849263	1.64766	-0.0709577		1038	246.481	12.0603		214	2.82944	1.287
256	30.3313	5147	4968	224643	43.6454	0.965222	1.63994	-0.0153726		1048	249.75	4.34783		216	2.82944	0.47481
256.2	30.384	4885	4281	220450	45.1279	0.876356	1.65445	-0.0573193		1058	253.019	5.94059		218	2.82944	0.135064
256.4	30.4368	5299	4243	225426	42.5412	0.800717	1.62881	-0.0965209		1068	256.288	12.381		220	2.82944	0.0746568
256.6	30.4895	5159	3813	217428	42.1454	0.739097	1.62475	-0.131299		1078	259.557	7.07547		222	3.87945	0
256.8	30.5423	4872	3411	212748	43.6675	0.700123	1.64016	-0.154826		1088	262.826	4.63918		224	3.87945	0.00598108
257	30.595	5499	4287	236704	43.0449	0.779596	1.63392	-0.10813		1098	266.095	1.49254		226	3.87945	0.347763
257.2	30.6477	4590	3920	214669	46.7688	0.854031	1.66996	-0.0685266		1108	269.364	5		228	3.87945	1.3645
257.4	30.7005	5137	3505	227022	44.1935	0.682305	1.64536	-0.166022		1118	272.633	4.4335		230	3.87945	0.900163
257.6	30.7532	5047	3646	228615	45.2972	0.722409	1.65607	-0.141217		1128	275.902	6.79612		232	3.87945	0.152345
257.8	30.806	5065	4844	223274	44.0817	0.956367	1.64426	-0.0193753		1138	279.17	3.33333		234	3.87945	1.21082
261.2	31.7026	4523	5916	226898	50.1654	1.30798	1.7004	0.116602		1148	284.906	1.5		236	2.62796	0.889621
262.8	32.1246	4399	3954	197713	44.945	0.898841	1.65268	-0.0463173		1158	291.608	4.97512		238	2.62796	0.894499
263	32.1773	4600	3503	200973	43.6898	0.761522	1.64038	-0.118318		1168	297.475	4.9505		240	2.62796	0.727907
263.2	32.2301	4462	3609	200221	44.8725	0.80883	1.65198	-0.0921427		1178	303.342	2.5		242	2.62796	0.576557
263.4	32.2828	4488	3677	208750	46.5129	0.819296	1.66757	-0.0865592		1188	308.29	4.0201		244	2.62796	0.783335
263.6	32.3356	4629	4160	213016	46.0177	0.898682	1.66293	-0.0463939		1198	311.145	2		246	3.05914	0.285944
263.8	32.3883	4542	4255	213370	46.9771	0.936812	1.67189	-0.0283476		1208	314	5.25		248	3.05914	0.296116
264	32.4411	4512	4336	207420	45.9707	0.960993	1.66248	-0.0172798		1218	316.854	4.47761		250	3.05914	0.485086
264.2	32.4938	4729	4519	207268	43.8291	0.955593	1.64176	-0.019727		1228	318.56	3.75		252	3.05914	0.929413
264.4	32.5466	4462	5000	202783	45.4467	1.12057	1.6575	0.0494404		1238	320.136	5		254	3.05914	0.618925
264.6	32.5993	4514	4646	209952	46.5113	1.02924	1.66756	0.0125177		1248	321.712	5		256	3.05914	0.199746
264.8	32.652	4532	4068	209287	46.1798	0.897617	1.66445	-0.046909		1258	323.288	5.5		258	3.05914	0.13344
265	32.7048	4349	4234	205405	47.2304	0.973557	1.67422	-0.0116386		1268	324.864	4		260	3.05914	0.431073
265.2	32.7575	4427	4216	205529	46.4262	0.952338	1.66676	-0.0212089		1278	326.44	7.5		262	3.05914	0.151943
265.4	32.8103	4625	4075	205818	44.5012	0.881081	1.64837	-0.0549841		1288	328.016	6.25		264	3.05914	0
265.6	32.863	4429	3858	200940	45.3692	0.871077	1.65676	-0.0599435		1298	329.592	8		266	3.05914	0
265.8	32.9158	4540	4702	200998	44.2727	1.03568	1.64614	0.0152268		1308	331.168	6.75		268	3.05914	0.185298
266	32.9685	4439	4203	197284	44.4433	0.946835	1.64781	-0.0237258		1318	332.744	3.5		270	3.05914	0.444722
266.2	33.0213	4186	3304	191835	45.8278	0.789298	1.66113	-0.102759		1328	334.32	4.25		272	3.05914	0.0288822
266.4	33.074	4225	3642	197105	46.6521	0.862012	1.66887	-0.0644868		1338	335.896	4.25		274	3.05914	0.121465
266.6	33.1267	4731	4600	208841	44.1431	0.97231	1.64486	-0.0121951		1348	337.472	8.75		276	3.05914	0.0219625
266.8	33.1795	4328	4568	193254	44.652	1.05545	1.64984	0.0234388		1358	339.048	7.75		278	3.05914	0
267	33.2322	4644	5101	207727	44.7302	1.09841	1.6506	0.0407631		1368	341.413	16.4179		280	3.05914	0.0864052
267.2	33.285	4185	4840	198557	47.4449	1.15651	1.67619	0.0631499		1378	344.396	7.5		282	1.46954	0.100623
267.4	33.3377	3957	3938	176434	44.5878	0.995198	1.64922	-0.00209034		1388	347.38	10.0503		284	1.46954	0.0714892
267.6	33.3905	3947	5448	169626	42.9759	1.38029	1.63323	0.13997		1398	350.363	9.31373		286	1.46954	0.038339
269.4	33.8652	3115	3520	154885	49.7223	1.13002	1.69655	0.0530846		1408	353.347	20.1005		288	1.46954	0.0261971
269.6	33.9179	3257	3809	159372	48.9321	1.16948	1.68959	0.0679932		1418	356.33	29.4118		290	1.46954	0.271472
269.8	33.9707	2938	3627	147488	50.2001	1.23451	1.7007	0.0914958		1428	359.314	16.6667		292	1.70449	0.515427
270	34.0234	3148	3578	152974	48.594	1.13659	1.68658	0.0556056		1438	362.297	3.0303		294	1.70449	0.257495
270.6	34.1816	2641	3303	145898	55.2435	1.25066	1.74228	0.0971402		1448	365.281	15.2174		296	1.70449	0.392678
270.8	34.2344	2699	3434	159441	59.0741	1.27232	1.7714	0.104597		1458	368.265	5.64516		298	1.70449	0.63951
271	34.2871	2848	3379	156964	55.1138	1.18645	1.74126	0.0742482		1468	371.248	12.7551		300	1.70449	0.695902
271.2	34.3399	2811	3545	155093	55.1736	1.26112	1.74173	0.100755		1478	374.232	9.61538		302	1.70449	0.71943
271.4	34.3926	2770	3324	154340	55.7184	1.2	1.746	0.0791812		1488	377.215	3.9801		304	1.70449	0.574707
271.6	34.4454	2910	3324	148355	50.9811	1.14227	1.70741	0.057768		1498	380.199	9.21053		306	1.70449	0.258625
271.8	34.4981	2894	3323	147093	50.8269	1.14824	1.70609	0.0600318		1508	383.182	6.03015		308	3.50298	1.37617
272	34.5509	2820	3930	145635	51.6436	1.39362	1.71302	0.144143		1518	385.76	8		310	3.50298	0.807894
272.2	34.6036	2801	3066	134286	47.9422	1.09461	1.68072	0.039259		1528	387.971	2.05128		312	3.50298	1.54689
272.4	34.6563	2696	3012	140876	52.2537	1.11721	1.71812	0.0481351		1538	390.183	1.99005		314	3.50298	1.97896
273	34.8146	2669	3173	140047	52.4717	1.18883	1.71993	0.0751215		1548	392.394	2.9703		316	3.50298	3.0614
273.2	34.8673	2687	3164	138730	51.6301	1.17752	1.7129	0.0709688		1558	394.606	5.25		318	6.34519	2.39693
273.4	34.9201	2770	3331	150936	54.4895	1.20253	1.73631	0.0800949		1568	396.875	4.75		320	6.34519	2.40291
274.4	35.1838	2318	2847	128790	55.5608	1.22821	1.74477	0.089274		1578	399.437	2.5		322	6.34519	5.16278
274.6	35.2365	2600	3403	149398	57.4608	1.30885	1.75937	0.116889		1588	401.999	2.75		324	6.34519	5.99588
274.8	35.2893	2996	3526	171671	57.3001	1.1769	1.75816	0.0707405		1598	404.561	2.75		326	6.34519	5.41852
275	35.342	2971	3683	171052	57.5739	1.23965	1.76023	0.0932991		1608	407.123	5		328	6.34519	4.5485
275.2	35.3956	3001	3715	179002	59.6475	1.23792	1.77559	0.0926928		1618	409.685	2.75		330	6.34519	5.50786
275.4	35.4505	3405	4377	203534	59.775	1.28546	1.77652	0.109059		1628	412.246	3		332	6.34519	4.28726
275.6	35.5055	3171	3626	184054	58.0429	1.14349	1.76375	0.0582316		1638	414.808	4.75		334	6.34519	4.62127
275.8	35.5604	2805	3829	179709	64.0674	1.36506	1.80664	0.135153		1648	417.37	0		336	6.34519	2.42447
276	35.6154	3260	4147	183985	56.4371	1.27209	1.75156	0.104516		1658	419.932	7		338	6.34519	1.96773
276.2	35.6704	3300	4806	196437	59.5264	1.45636	1.77471	0.16327		1668	422.494	9.45274		340	6.34519	0.718166
276.4	35.7253	3840	4613	209885	54.6576	1.2013	1.73765	0.0796522		1678	425.056	8.54271		342	3.35171	0.763353
276.6	35.7803	4171	4707	215877	51.7567	1.12851	1.71397	0.052504		1688	427.618	9.80392		344	3.35171	0.625612
276.8	35.8352	3874	5149	218280	56.3449	1.32912	1.75085	0.123563		1698	430.071	8.54271		346	3.35171	0.11329
277	35.8902	4320	5226	237486	54.9736	1.20972	1.74015	0.0826857		1708	432.476	10.0503		348	3.35171	0.700893
277.2	35.9451	4207	5550	238346	56.6546	1.31923	1.75324	0.12032		1718	434.881	6.5		350	3.35171	0.608179
277.4	36.0001	4343	5335	227020	52.2726	1.22841	1.71827	0.0893446		1728	437.287	26.1146		352	3.35171	1.4026
277.6	36.0551	3978	5135	217290	54.6229	1.29085	1.73737	0.110876		1738	439.692	40.5797		354	3.35171	1.05063
277.8	36.11	4394	5014	228135	51.9197	1.1411	1.71533	0.0573243		1748	442.097	29.4798		356	3.35171	0.174704
278	36.165	4290	6121	237478	55.3562	1.42681	1.74317	0.154365		1758	444.502	32.2835		358	3.35171	0.0308974
278.2	36.2199	4128	6166	238079	57.6742	1.4937	1.76098	0.174264		1768	446.908	33.9623		360	3.35171	0.156874
278.4	36.2749	4189	6080	258037	61.5987	1.45142	1.78957	0.161793		1778	449.313	27.972		362	3.35171	0.0546057
278.6	36.3298	4065	5867	258530	63.599	1.4433	1.80345	0.159356		1788	451.718	18.6567		364	3.35171	0.110723
278.8	36.3848	4428	7043	262043	59.1786	1.59056	1.77216	0.20155		1798	454.124	21.2766		366	3.35171	0.29038
279	36.4397	3953	7322	269932	68.2854	1.85226	1.83433	0.267703		1808	456.529	17.1429		368	3.35171	0.368368
279.2	36.4947	4285	6026	263201	61.4238	1.4063	1.78834	0.148078		1818	458.934	7.77202		370	3.35171	0.154721
279.4	36.5497	4036	6804	259217	64.2262	1.68583	1.80771	0.226813		1828	461.339	7.69231		372	3.35171	0.245549
279.6	36.6046	3895	6333	246799	63.363	1.62593	1.80184	0.211102		1838	463.745	16		374	3.35171	0.191448
279.8	36.6596	4089	6462	248313	60.7271	1.58034	1.78338	0.19875		1848	466.15	8.48485		376	3.35171	0.836206
280	36.7145	4481	7815	232426	51.8692	1.74403	1.71491	0.241554		1858	468.555	9.67742		378	3.35171	0.0764339
280.2	36.7695	4278	5489	216318	50.5652	1.28308	1.70385	0.108252		1868	470.96	2.94118		380	3.35171	0.221037
280.4	36.8244	4502	5205	213781	47.4858	1.15615	1.67656	0.0630152		1878	473.366	2		382	3.35171	0.643259
280.6	36.8794	4104	4684	216930	52.8582	1.14133	1.72311	0.0574095		1888	475.771	4.16667		384	3.35171	0.325278
280.8	36.9344	4314	4490	215898	50.0459	1.0408	1.69937	0.0173662		1887	475.53	2.25		386	4.52173	0.485093
281	36.9893	4804	4564	213520	44.4463	0.950042	1.64784	-0.0222574		1897	477.936	3.5		388	4.52173	0.644527
281.2	37.0443	4479	4442	212061	47.3456	0.991739	1.67528	-0.00360251		1907	480.341	7.5		390	4.52173	0.681069
281.4	37.0992	4694	5257	214873	45.7761	1.11994	1.66064	0.0491949		1917	482.993	5.05051		392	4.52173	0.618243
281.6	37.1542	4716	5204	221135	46.8904	1.10348	1.67108	0.0427635		1927	485.97	5.47264		394	4.52173	1.80467
281.8	37.2091	5273	5473	229599	43.5424	1.03793	1.63891	0.0161677		1937	488.947	4.47761		396	4.52173	2.38093
282	37.2641	4745	5592	242434	51.0925	1.1785	1.70836	0.0713309		1947	491.924	3.57143		398	3.90322	3.0794
282.2	37.319	4626	5678	241544	52.2144	1.22741	1.71779	0.0889898		1957	494.9	4.98753		400	3.90322	3.21138
282.4	37.374	4341	5640	229512	52.8708	1.29924	1.72322	0.113689		1967	497.877	3.9801		402	3.90322	3.16633
282.6	37.429	4449	5863	238610	53.6323	1.31782	1.72943	0.119857		1977	500.854	8.45771		404	3.90322	3.11149
282.8	37.4839	4239	4948	240490	56.7327	1.16726	1.75383	0.0671663		1987	503.831	2.75		406	3.90322	3.47349
283	37.5389	4305	4717	233102	54.1468	1.0957	1.73357	0.0396927		1997	506.808	6.5		408	3.90322	3.67293
283.2	37.5938	4404	4856	224168	50.901	1.10263	1.70673	0.0424314		2007	509.785	6.93069		410	3.90322	3.44856
283.4	37.6488	4439	5023	222439	50.1102	1.13156	1.69993	0.053678		2017	512.761	3.5		412	3.90322	3.41515
283.6	37.7037	4517	5493	215335	47.6721	1.21607	1.67826	0.0849595		2027	515.738	1.89573		414	3.90322	2.95244
283.8	37.7587	4631	5039	220902	47.7007	1.0881	1.67852	0.0366696		2037	518.715	4.56853		416	3.90322	2.20131
284	37.8137	4597	4769	218083	47.4403	1.03742	1.67615	0.0159528		2047	521.692	5.52764		418	3.90322	2.18364
284.2	37.8686	4585	6209	213181	46.4953	1.3542	1.66741	0.131682		2057	524.669	5.02513		420	3.90322	2.39429
284.4	37.9236	4568	8830	220014	48.1642	1.93301	1.68272	0.286235		2087	533.599	6.03015		422	3.90322	2.89844
284.6	37.9785	4632	5785	219905	47.4752	1.24892	1.67647	0.0965348		2097	538.121	10.2041		424	3.90322	1.59717
284.8	38.0335	4667	4777	217098	46.5177	1.02357	1.66762	0.0101174		2107	542.655	16.6667		426	3.90322	0.00139648
285	38.0884	4419	4957	217634	49.2496	1.12175	1.6924	0.0498949		2117	547.19	9.77444		428	3.90322	0.00129665
285.2	38.1434	4486	5409	217227	48.4233	1.20575	1.68505	0.0812577		2127	551.724	0		430	4.15754	0.291494
285.4	38.1983	4427	4852	214811	48.5229	1.096	1.68595	0.0398113		2137	556.259	8.33333		432	4.15754	0.853832
285.6	38.2533	4370	5957	212480	48.6224	1.36316	1.68684	0.134546		2147	560.793	9.52381		434	4.15754	0.528748
285.8	38.3083	4612	5725	211081	45.7678	1.24133	1.66056	0.0938862		2157	565.328	5.5		436	4.15754	0.26754
286	38.3632	4535	4283	210237	46.3588	0.944432	1.66613	-0.0248292		2167	569.862	8.54271		438	4.15754	0.644622
286.2	38.4182	4398	3853	210978	47.9714	0.87608	1.68098	-0.0574562		2177	574.396	6		440	4.15754	0.123841
286.4	38.4731	4618	4190	215810	46.7324	0.907319	1.66962	-0.0422399		2187	578.931	9		442	4.15754	0
286.6	38.5281	4334	4078	207666	47.9156	0.940932	1.68048	-0.0264417		2197	582.955	4.97512		444	4.15754	0.110812
286.8	38.583	4539	3705	199666	43.989	0.816259	1.64334	-0.088172		2207	586.666	7.22892		446	4.15754	0.327894
287	38.638	4294	5400	202842	47.2385	1.25757	1.6743	0.0995317		2217	590.378	2.24719		448	4.15754	0
287.2	38.693	4307	5598	210949	48.9782	1.29974	1.69	0.113858		2227	594.089	4.9505		450	4.15754	0
287.4	38.7479	4852	5903	219985	45.339	1.21661	1.65647	0.085152		2222	592.233	3.4398		452	4.15754	0
287.6	38.8029	4796	4347	210124	43.8123	0.90638	1.6416	-0.0426895		2232	595.944	3.10078		454	4.15754	0
287.8	38.8578	4696	5179	210824	44.8944	1.10285	1.65219	0.0425178		2242	599.655	1.53846		456	4.15754	0
288	38.9128	4431	9350	207926	46.9253	2.11013	1.67141	0.32431		2252	603.366	2.96296		458	4.15754	0.161234
288.2	38.9677	4636	5919	200169	43.1771	1.27675	1.63525	0.106105		2262	607.077	3.9801		460	4.15754	0.131445
288.4	39.0227	4182	5117	199184	47.6289	1.22358	1.67787	0.0876314		2272	610.788	6.40394		462	4.15754	0
288.6	39.0776	4336	4843	196794	45.3861	1.11693	1.65692	0.0480252		2282	614.499	3.44828		464	4.15754	0
288.8	39.1326	4305	4367	205058	47.6325	1.0144	1.6779	0.00621004		2292	618.21	3.7234		466	4.15754	0
289	39.1876	4449	5257	209944	47.189	1.18161	1.67384	0.0724756		2302	621.921	1.48515		468	4.15754	0
289.2	39.2425	4341	4663	204104	47.0177	1.07418	1.67226	0.0310756		2312	624.943	3.22581		470	4.15754	0
289.4	39.2975	4700	4358	199256	42.3949	0.927234	1.62731	-0.0328106		2322	627.791	19.3878		472	4.15754	0
289.6	39.3524	4325	4990	204068	47.1834	1.15376	1.67379	0.0621144		2332	630.639	13.0653		474	4.15754	0
289.8	39.4074	4338	4674	202800	46.7497	1.07746	1.66978	0.0323992		2342	633.487	17.8571		476	4.15754	0.000329952
290	39.4623	4289	4782	198116	46.1917	1.11495	1.66456	0.0472535		2352	636.335	18.6603		478	4.15754	0.357791
290.2	39.5173	4306	4649	198913	46.1944	1.07966	1.66459	0.0332855		2362	639.183	19.0955		480	4.15754	0.887802
290.4	39.5723	4399	4869	199495	45.3501	1.10684	1.65658	0.0440858		2372	642.031	17.2414		482	4.15754	0.30563
290.6	39.6272	4430	5080	202501	45.7113	1.14673	1.66002	0.05946		2382	644.879	11		484	3.3593	0.402405
290.8	39.6822	4359	5182	200358	45.9642	1.1888	1.66242	0.0751105		2392	647.727	10		486	3.3593	0.129411
291	39.7371	4570	5563	209211	45.7792	1.21729	1.66067	0.0853929		2402	650.575	10.396		488	3.3593	0.170832
291.2	39.7921	4700	5734	215346	45.8183	1.22	1.66104	0.0863598		2412	653.424	11.7647		490	3.3593	0.496234
291.4	39.847	4524	5964	218413	48.2787	1.3183	1.68376	0.120015		2422	656.272	5.15464		492	3.3593	0.470154
291.6	39.902	4234	5604	223137	52.7012	1.32357	1.72182	0.121747		2432	659.12	8.64198		494	3.3593	0.017045
291.8	39.9569	3951	5792	222819	56.3956	1.46596	1.75125	0.166122		2452	664.816	8.21918		496	3.3593	0.317001
292	40.0119	4154	6255	219822	52.9182	1.50578	1.7236	0.177761		2462	667.664	4.08163		498	3.3593	0.528841
292.2	40.0669	4711	6159	224278	47.6073	1.30737	1.67767	0.116397		2472	670.512	5.10204		500	3.3593	0.176947
292.4	40.1218	4626	6261	226148	48.8863	1.35344	1.68919	0.131438		2482	673.36	8.88889		502	3.3593	0.0189532
292.6	40.1768	4270	5794	213091	49.9042	1.35691	1.69814	0.132551		2492	676.208	5.94059		504	3.3593	0
292.8	40.2317	4351	5189	208205	47.8522	1.1926	1.6799	0.0764946		2502	679.056	6.25		506	3.3593	0.271057
293	40.2867	4192	5903	217844	51.9666	1.40816	1.71572	0.148652		2512	682.688	5.97015		508	3.3593	0.458428
293.2	40.3416	4464	7276	212945	47.7027	1.62993	1.67854	0.212169		2522	687.25	4.4335		510	3.3593	0.454928
293.4	40.3966	4075	6945	203716	49.9917	1.70429	1.6989	0.231545		2532	691.811	7		512	3.3593	0.726356
293.6	40.4516	4307	6578	206865	48.03	1.52728	1.68151	0.183919		2542	696.372	6.53266		514	3.3593	0.679656
293.8	40.5065	4348	6955	203627	46.8323	1.59959	1.67055	0.204008		2552	700.934	4.5		516	3.3593	1.03434
294	40.5615	4453	6210	206724	46.4235	1.39457	1.66674	0.144439		2562	705.495	4.97512		518	3.3593	0.632476
294.2	40.6164	4580	6183	211208	46.1153	1.35	1.66384	0.130334		2572	710.057	5.5		520	3.3593	0.190268
294.4	40.6714	4637	5413	219037	47.2368	1.16735	1.67428	0.0672009		2582	714.363	4.16667		522	3.3593	0.240629
294.6	40.7263	4807	5108	209928	43.6713	1.06262	1.6402	0.0263768		2592	716.673	10.9091		524	3.3593	1.2048
294.8	40.7813	4494	4995	202787	45.1239	1.11148	1.65441	0.0459024		2602	718.983	3.77358		526	3.3593	1.42817
295	40.8362	4364	5036	206817	47.3916	1.15399	1.6757	0.062201		2612	721.293	1.69492		528	3.3593	1.00536
295.2	40.8912	4654	5158	208312	44.7598	1.10829	1.65089	0.044655		2622	723.603	5.55556		530	3.3593	0.508387
295.4	40.9462	4447	5696	207767	46.7207	1.28086	1.66951	0.107503		2632	726.176	3.46821		532	3.3593	0.0721872
295.6	41.0011	4330	5785	205219	47.3947	1.33603	1.67573	0.125815		2642	730.351	6.03015		534	3.3593	0
295.8	41.0561	4451	5601	203927	45.816	1.25837	1.66102	0.099808		2652	734.526	9.54774		536	2.20534	0
296	41.111	4427	5800	209144	47.2428	1.31014	1.67434	0.117318		2662	738.7	8.10811		538	2.20534	0.00360896
296.2	41.166	4422	5748	208237	47.0911	1.29986	1.67294	0.113898		2672	742.875	5.51181		540	2.20534	0.0313155
296.4	41.2209	4454	6456	200919	45.1098	1.44948	1.65427	0.161213		2682	745.464	5.35714		542	2.20534	0.015369
296.6	41.2759	4606	6419	206696	44.8754	1.39362	1.65201	0.144143		2692	747.657	9.375		544	2.20534	0.125692
296.8	41.3309	4601	6614	205494	44.6629	1.43751	1.64995	0.157612		2702	749.851	8.33333		546	2.20534	0.111249
297	41.3858	4427	6127	206494	46.6442	1.38401	1.6688	0.141138		2712	752.045	7.5		548	2.20534	0.000850978
297.2	41.4408	4621	5659	203934	44.132	1.22463	1.64475	0.0880037		2722	754.239	6.5		550	2.20534	0
297.4	41.4957	4483	6577	205702	45.8849	1.4671	1.66167	0.166459		2732	756.432	6.5		552	2.20534	0
297.6	41.5507	4355	6038	209198	48.0363	1.38645	1.68157	0.141905		2742	760.928	5.94059		554	2.20534	0
297.8	41.6056	4572	5552	210574	46.0573	1.21435	1.6633	0.0843432		2752	766.983	2.51256		556	2.20534	0
298	41.6606	4221	5108	203073	48.1102	1.21014	1.68224	0.0828355		2762	773.037	2.52525		558	2.20534	0
298.2	41.7155	4150	4909	201673	48.5959	1.18289	1.6866	0.0729449		2772	779.092	5.47264		560	2.20534	0
298.4	41.7705	4299	5404	202920	47.2017	1.25704	1.67396	0.0993479		2782	783.628	7		562	2.20534	0
298.6	41.8255	4499	5381	212471	47.2263	1.19604	1.67418	0.077747		2792	787.897	22		564	2.20534	0
298.8	41.8804	4261	5219	197758	46.4112	1.22483	1.66662	0.0880758		2802	792.166	22.8856		566	2.20534	0.158143
299	41.9354	4007	4727	193920	48.3953	1.17969	1.6848	0.0717663		2812	794.974	5.9322		568	2.20534	0.411128
299.2	41.9903	4388	4516	192131	43.7856	1.02917	1.64133	0.0124873		2822	797.617	5.49451		570	2.20534	0.198587
299.4	42.0453	4311	4391	195525	45.3549	1.01856	1.65662	0.00798541		2832	800.26	2.63158		572	2.20534	0.332747
299.6	42.1002	4194	4749	198091	47.232	1.13233	1.67424	0.0539737		2842	802.902	2.27273		574	2.20534	0.239923
299.8	42.1552	4171	4178	195075	46.7694	1.00168	1.66996	0.000728246		2852	805.545	0		576	2.20534	0.56496
300	42.2102	4055	4411	196373	48.4274	1.08779	1.68509	0.0365462		2862	808.188	10.8108		578	2.20534	1.25731
300.2	42.2651	4394	4394	197366	44.9172	1	1.65241	0		2872	810.831	4.7619		580	2.20534	1.53733
300.4	42.3201	4524	5215	202572	44.7772	1.15274	1.65106	0.0617317		2882	813.474	5.60748		582	2.69466	1.45975
300.6	42.375	4532	3701	201323	44.4226	0.816637	1.6476	-0.0879708		2892	816.899	5.5		584	2.69466	0.535971
300.8	42.43	4432	3523	203052	45.815	0.794901	1.66101	-0.0996871		2902	821.086	10		586	2.69466	0.0214669
301	42.4849	4335	3887	203148	46.8623	0.896655	1.67082	-0.0473746		2912	825.272	6.54506		588	2.69466	0
301.2	42.5399	4304	3801	210237	48.8469	0.883132	1.68884	-0.0539744		4134	1223.56	0.995025		590	2.69466	0.00541396
301.4	42.5948	4130	4675	211784	51.2794	1.13196	1.70994	0.0538316		4144	1226.2	2.48756		592	2.69466	0.0777466
301.6	42.6498	4042	4383	210696	52.1267	1.08436	1.71706	0.0351752		4154	1228.83	0.492611		594	2.69466	0.146983
301.8	42.7048	4030	4561	211311	52.4345	1.13176	1.71962	0.053755		4164	1231.47	0.995025		596	2.69466	0.514919
302	42.7597	4238	4343	211259	49.8487	1.02478	1.69765	0.0106289		4174	1234.1	0.49505		598	2.69466	0.0868403
302.2	42.8147	4429	4527	204903	46.2639	1.02213	1.66524	0.00950481		4184	1236.74	0.490196		600	2.69466	0
302.4	42.8696	4371	5653	206708	47.2908	1.2933	1.67478	0.111698		4194	1239.37	1.06383		602	2.69466	0
302.6	42.9246	4062	4911	214157	52.7221	1.20901	1.72199	0.08243		4204	1242	0		604	2.69466	0
302.8	42.9795	4084	4927	231571	56.702	1.20642	1.7536	0.0814968		4214	1244.64	3.9604		606	2.69466	0
303	43.0345	4228	4309	236755	55.9969	1.01916	1.74816	0.00824152		4224	1246.83	3.0303		608	2.69466	0
303.2	43.0895	4118	3858	223910	54.3735	0.936863	1.73539	-0.0283241		4234	1248.98	1.95122		610	2.69466	0
303.4	43.1444	3660	3696	215525	58.8866	1.00984	1.77002	0.00425088		4244	1251.12	0		612	2.69466	0.0117735
303.6	43.1994	3773	3705	223473	59.2295	0.981977	1.77254	-0.00789859		4254	1253.27	3		614	2.69466	0.486492
303.8	43.2543	3784	3876	211666	55.9371	1.02431	1.7477	0.0104326		4264	1255.42	1.01523		616	2.69466	0.893245
304	43.3093	3855	3653	219707	56.9927	0.947601	1.75582	-0.0233747		4274	1257.56	0		618	2.69466	0.313298
304.2	43.3642	4158	3691	225063	54.1277	0.887686	1.73342	-0.0517404		4284	1259.71	2.9703		620	2.69466	0.315696
304.4	43.4192	4137	3955	226623	54.7796	0.956007	1.73862	-0.019539		4294	1261.85	3.5		622	2.69466	0.0459886
304.6	43.4741	4137	4019	221199	53.4685	0.971477	1.7281	-0.0125675		4304	1264	0		624	3.51116	0
304.8	43.5291	3767	3451	208760	55.4181	0.916114	1.74365	-0.0380507		4314	1266.14	1.00503		626	3.51116	0
305	43.5841	3891	3400	208890	53.6854	0.873811	1.72986	-0.0585823		4324	1268.29	0		628	3.51116	0.0923658
305.2	43.639	3795	4570	200972	52.957	1.20422	1.72392	0.0807044		4334	1270.44	1.9802		630	3.51116	0.164543
305.4	43.694	3934	5422	200264	50.9059	1.37824	1.70677	0.139325		4344	1272.58	2.01005		632	3.51116	0
305.6	43.7489	3913	5505	200840	51.3263	1.40685	1.71034	0.148247		4354	1274.73	0		634	3.51116	0.057373
305.8	43.8039	3754	5339	200331	53.3647	1.42222	1.72725	0.152966		4364	1276.87	0		636	3.51116	0.0448894
306	43.8588	3640	4520	201990	55.4918	1.24176	1.74423	0.0940371		4374	1279.02	0.995025		638	3.51116	0
306.2	43.9138	3798	3624	206525	54.3773	0.954186	1.73542	-0.0203668		4384	1281.16	0.492611		640	3.51116	0
306.4	43.9688	4121	4518	217168	52.6979	1.09634	1.72179	0.0399436		4394	1283.31	0.497512		642	3.51116	0
306.6	44.0237	4168	4956	204206	48.9938	1.18906	1.69014	0.0752036		4404	1285.46	1.50754		644	3.51116	0.172386
306.8	44.0787	4184	4029	189184	45.2161	0.962954	1.65529	-0.0163944		4414	1288.17	1.48515		646	3.51116	0.294247
307	44.1336	4447	4395	202718	45.5853	0.988307	1.65883	-0.00510825		4424	1290.89	1.02564		648	3.51116	0.0260479
307.2	44.1886	3844	3970	196156	51.0291	1.03278	1.70782	0.0140071		4434	1293.61	0.917431		650	3.51116	0
307.4	44.2435	3908	3666	200270	51.2462	0.938076	1.70966	-0.0277621		4444	1296.33	1.5		652	3.51116	0
307.6	44.2985	3916	4126	202766	51.7789	1.05363	1.71415	0.0226865		4454	1299.05	1.5		654	3.51116	0
307.8	44.3534	3851	3697	203643	52.8806	0.96001	1.7233	-0.0177241		4464	1301.77	1.5		656	3.51116	0
308	44.4084	4142	3770	201969	48.7612	0.910188	1.68807	-0.0408687		4474	1304.49	0.5		658	3.51116	0
308.2	44.4634	4243	3710	202681	47.7683	0.874381	1.67914	-0.0582991		4484	1307.22	2.04082		660	3.51116	0
308.4	44.5183	4197	3773	203074	48.3855	0.898975	1.68472	-0.0462522		4494	1309.94	2		662	3.51116	0
308.6	44.5733	4038	3811	196307	48.6149	0.943784	1.68677	-0.0251274		4504	1312.66	3.46535		664	3.51116	0
308.8	44.6282	4228	4797	206909	48.9378	1.13458	1.68964	0.0548347		4514	1315.38	0		666	3.51116	0
309	44.6832	3902	4945	202544	51.9077	1.2673	1.71523	0.102879		4524	1318.1	14.2857		668	3.51116	0
309.2	44.7381	4972	4048	205956	41.4232	0.814159	1.61724	-0.0892906		4534	1320.82	0		670	3.51116	0
309.4	44.7931	3913	4196	205336	52.4753	1.07232	1.71996	0.0303256		4544	1323.71	0.502513		672	3.51116	0.0977119
309.6	44.8481	4041	4272	203879	50.4526	1.05716	1.70288	0.0241424		4554	1326.6	0		674	3.51116	0.572913
309.8	44.903	3821	4406	197418	51.6666	1.1531	1.71321	0.0618675		4564	1329.5	2.05479		676	3.51116	0.313218
310	44.958	4080	5049	200445	49.1287	1.2375	1.69134	0.0925452		4574	1332.39	0		678	3.51116	0.10465
310.2	45.0129	4264	4824	202921	47.5894	1.13133	1.67751	0.0535901		4584	1335.29	1.50754		680	3.51116	0.923933
310.4	45.0679	4082	4050	202500	49.608	0.992161	1.69555	-0.00341798		4594	1338.18	1.00503		682	2.19231	0.828681
310.6	45.1228	4176	4606	200766	48.0761	1.10297	1.68193	0.0425634		4604	1341.08	0.497512		684	2.19231	0.884416
310.8	45.1778	3997	4836	200189	50.0848	1.20991	1.69971	0.0827521		4614	1343.97	7.53769		686	2.19231	1.03498
311	45.2327	4021	5101	200170	49.7811	1.26859	1.69706	0.103321		4624	1346.86	5.52764		688	2.19231	1.09646
311.2	45.2877	4064	5373	197687	48.6435	1.3221	1.68702	0.121263		4634	1349.76	2.47525		690	2.19231	0.837641
311.4	45.3427	3972	4876	192729	48.5219	1.22759	1.68594	0.0890545		4644	1352.65	2.53807		692	2.19231	0.416051
311.6	45.3976	4013	4311	193589	48.2405	1.07426	1.68341	0.0311089		4654	1355.55	1.5		694	2.19231	0.35525
311.8	45.4526	4043	4473	196210	48.5308	1.10636	1.68602	0.0438952		4664	1358.44	1.04167		696	2.19231	0.418067
312	45.5075	4314	4426	199424	46.2272	1.02596	1.6649	0.0111313		4674	1361.33	0		698	2.19231	0.140836
312.2	45.5625	4382	4263	197821	45.144	0.972843	1.6546	-0.011957		4684	1364.53	3		700	2.19231	0.0512242
312.4	45.6174	4022	3974	194783	48.4294	0.988066	1.68511	-0.0052142		4694	1368.13	0.505051		702	2.19231	0.0450728
312.6	45.6724	4401	4096	192908	43.8328	0.930698	1.6418	-0.0311914		4704	1371.73	1.5		704	2.19231	0.00041423
312.8	45.7274	4281	3994	194100	45.3399	0.93296	1.65648	-0.0301372		4714	1375.33	0		706	2.19231	0.0327935
313	45.7823	4024	4017	192446	47.8246	0.99826	1.67965	-0.00075614		4724	1378.93	1.47059		708	2.19231	0.132377
313.2	45.8373	4302	3868	192034	44.6383	0.899117	1.64971	-0.0461839		4734	1382.53	2		710	2.19231	0.15462
313.4	45.8922	4030	4013	187385	46.4975	0.995782	1.66743	-0.00183589		4744	1386.13	1.99005		712	2.19231	0.0355776
313.6	45.9472	3993	3712	188231	47.1402	0.929627	1.67339	-0.0316913		4754	1389.74	2.5		714	2.19231	0
313.8	46.0021	4022	3907	190339	47.3245	0.971407	1.67509	-0.0125987		4764	1393.34	3.51759		716	4.32898	0.0061932
314	46.0571	4240	5281	195068	46.0066	1.24552	1.66282	0.0953503		4774	1396.94	1.47783		718	4.32898	0.30628
314.2	46.112	3776	4490	192558	50.9952	1.18909	1.70753	0.0752144		4784	1400.54	1.94175		720	4.32898	0.697198
314.4	46.167	4103	4267	194658	47.4428	1.03997	1.67617	0.0170211		4794	1404.14	0.507614		722	4.32898	0.0242329
314.6	46.222	3992	4409	195587	48.9947	1.10446	1.69015	0.0431496		4804	1407.74	0		724	4.32898	0.0595146
314.8	46.2769	4127	4301	195085	47.2704	1.04216	1.67459	0.017935		4814	1410.51	0.995025		726	4.32898	0.950054
315	46.3319	3785	4219	204523	54.0351	1.11466	1.73268	0.0471436		4824	1413.18	1.5		728	2.39528	0.486892
315.2	46.3868	3800	4119	211436	55.6411	1.08395	1.7454	0.0350082		4834	1415.84	0.97561		730	2.39528	0.459231
315.4	46.4418	3845	4782	212680	55.3134	1.24369	1.74283	0.0947132		4844	1418.51	0.492611		732	2.39528	0.828164
315.6	46.4967	3627	4904	203282	56.0469	1.35208	1.74855	0.131003		4854	1421.17	1.46341		734	2.39528	0.936371
315.8	46.5517	4113	5030	199528	48.5115	1.22295	1.68585	0.0874093		4864	1423.84	1.47783		736	2.39528	1.38061
316	46.6067	4252	5042	190923	44.9019	1.18579	1.65226	0.0740096		4874	1426.62	0.990099		738	2.39528	2.08139
316.2	46.6616	3916	4665	188460	48.1256	1.19127	1.68238	0.076009		4884	1430.09	0		740	2.39528	1.44507
316.4	46.7166	4013	4784	189603	47.2472	1.19213	1.67438	0.076322		4894	1433.57	2.98507		742	2.39528	0.366772
316.6	46.7715	4114	5102	187808	45.6509	1.24016	1.65945	0.0934762		4904	1437.05	0.990099		744	2.39528	0.538916
316.8	46.8265	4213	4773	187526	44.5113	1.13292	1.64847	0.0542		4914	1440.52	2.94118		746	4.55855	1.6884
317	46.8814	4329	4839	194080	44.8325	1.11781	1.65159	0.048368		4924	1444	4.92611		748	4.55855	1.61335
317.2	46.9364	4005	4421	191165	47.7316	1.10387	1.67881	0.042918		4934	1447.47	2.01005		750	4.55855	0.97003
317.4	46.9913	3878	4992	184901	47.6795	1.28726	1.67833	0.109667		4944	1450.95	0		752	4.55855	0.690538
317.6	47.0463	4088	4454	187800	45.9393	1.08953	1.66218	0.0372393		4954	1453.29	5.5		754	4.55855	0.578522
317.8	47.1013	4025	5191	187842	46.6688	1.28969	1.66903	0.110485		4964	1454.89	3.51759		756	4.55855	1.38383
318	47.1562	4006	5505	183414	45.7848	1.37419	1.66072	0.138046		4974	1456.48	0.990099		758	1.65167	0.290285
318.2	47.2112	3941	5848	183232	46.4938	1.48389	1.66739	0.171401		4981	1457.6	2		760	1.65167	0.43319
318.4	47.2661	3941	5481	184211	46.7422	1.39076	1.66971	0.143253		4991	1459.2	1.50754		762	1.65167	0.460296
318.6	47.3211	3860	5173	186776	48.3876	1.34016	1.68473	0.127155		5001	1460.79	0.505051		764	1.65167	0.325374
318.8	47.376	3938	4594	186843	47.4462	1.16658	1.6762	0.0669153		5011	1462.39	0.490196		766	1.65167	0.287777
319	47.431	3893	5805	196895	50.5767	1.49114	1.70395	0.173518		5021	1463.98	0		768	1.65167	0.376175
319.2	47.486	3892	5040	188490	48.4301	1.29496	1.68512	0.112258		5031	1465.58	0		770	1.65167	0.55667
319.4	47.5409	3702	4542	185940	50.2269	1.2269	1.70094	0.0888107		5041	1467.18	0		772	1.65167	0.591583
319.6	47.5959	3800	4680	184268	48.4916	1.23158	1.68567	0.0904623		5051	1468.77	5.82524		774	1.65167	0.516597
319.8	47.6508	3999	5284	193620	48.4171	1.32133	1.685	0.121011		5061	1472.05	1.49254		776	1.65167	0.399861
320	47.7058	4010	5063	189094	47.1556	1.26259	1.67353	0.101264		5071	1475.98	0.5		778	1.65167	0.598226
320.2	47.7607	3970	4544	186235	46.9106	1.14458	1.67127	0.0586478		5081	1479.9	3		780	1.65167	0.609046
320.4	47.8157	3950	4967	187044	47.3529	1.25747	1.67535	0.0994971		5091	1483.82	1.00503		782	2.34259	0.658555
320.6	47.8706	3863	4787	190540	49.3244	1.23919	1.69306	0.0931387		5101	1487.74	1.9802		784	2.34259	0.715952
320.8	47.9256	4096	4738	194451	47.4734	1.15674	1.67645	0.0632351		5111	1491.66	1.99005		786	2.34259	0.304961
321	47.9806	3758	4822	201765	53.6895	1.28313	1.72989	0.10827		5121	1495.12	7.38916		788	2.34259	0.071775
321.2	48.0355	4040	5745	200278	49.5738	1.42203	1.69525	0.152909		5131	1498.16	1.97044		790	2.34259	0.222808
321.4	48.0905	3887	5211	187551	48.2508	1.34062	1.6835	0.127307		5141	1501.2	2.46305		792	2.34259	0.0518538
321.6	48.1454	3876	4898	180845	46.6576	1.26367	1.66892	0.101635		5151	1504.23	3.7037		794	3.78379	0.233829
321.8	48.2004	3879	4704	183727	47.3645	1.21268	1.67545	0.0837475		5161	1507.27	0.5		796	3.78379	0.202639
322	48.2553	4025	5056	199071	49.4586	1.25615	1.69424	0.0990412		5171	1510.47	1		798	3.78379	0.17801
322.2	48.3103	4320	6016	214908	49.7472	1.39259	1.69677	0.143824		5181	1515.15	0.995025		800	3.78379	0.237521
322.4	48.3653	4292	5181	206670	48.1524	1.20713	1.68262	0.0817539		5191	1519.82	0.5		802	3.78379	0.0252024
322.6	48.4202	4433	5462	214392	48.3627	1.23212	1.68451	0.090654		5201	1524.5	1.48515		804	3.78379	0.0272494
322.8	48.4752	4242	5125	212395	50.0695	1.20816	1.69957	0.0821232		5211	1529.22	1.99005		806	3.78379	0.321256
323	48.5301	4078	5431	217356	53.2997	1.33178	1.72672	0.124433		5221	1533.35	1.49254		808	3.78379	1.06534
323.2	48.5851	4135	6133	221304	53.5197	1.48319	1.72851	0.171197		5231	1536.88	0.995025		810	3.78379	0.165615
323.4	48.64	4154	5619	230240	55.4261	1.35267	1.74371	0.131193		5241	1540.42	2		812	3.78379	1.1501
323.6	48.695	4042	5232	232562	57.5364	1.29441	1.75994	0.112071		5251	1543.95	0.990099		814	3.78379	1.0467
323.8	48.7499	4293	5193	223097	51.9676	1.20964	1.71573	0.0826574		5261	1547.49	1.99005		816	2.38869	0.676437
324	48.8049	3825	5336	219751	57.4512	1.39503	1.7593	0.144584		5271	1551.02	0.5		818	2.38869	1.44475
324.2	48.8599	4095	5022	218771	53.4239	1.22637	1.72774	0.0886228						820	2.38869	1.8187
324.4	48.9148	4147	5265	224346	54.0984	1.26959	1.73318	0.103664						822	2.38869	1.30396
324.6	48.9698	4139	5132	221954	53.625	1.23991	1.72937	0.0933912						824	2.38869	0.889478
324.8	49.0247	3911	4980	221241	56.5689	1.27333	1.75258	0.104942						826	2.38869	1.16332
325	49.0797	3591	4441	196066	54.5993	1.2367	1.73719	0.0922654						828	2.38869	0.997541
325.2	49.1346	3797	4346	192625	50.7308	1.14459	1.70527	0.0586491						830	2.38869	0.728938
325.4	49.1896	3733	4662	198144	53.079	1.24886	1.72492	0.0965143						832	2.38869	0.132872
325.6	49.2446	3536	4612	191556	54.1731	1.3043	1.73378	0.115377						834	2.38869	0.547534
325.8	49.2995	3800	4340	190650	50.1711	1.14211	1.70045	0.0577061						836	2.38869	1.04035
326	49.3545	3672	4655	202478	55.1411	1.2677	1.74148	0.103017						838	2.38869	0.631597
326.2	49.4094	3691	4353	209780	56.8355	1.17936	1.75462	0.0716446						840	2.38869	0.511211
326.4	49.4644	3902	4851	214184	54.8908	1.24321	1.7395	0.094544						842	2.38869	0.159951
326.6	49.5193	3820	4845	213656	55.9309	1.26832	1.74765	0.10323						844	3.33451	0.879846
326.8	49.5743	3984	5187	213310	53.5417	1.30196	1.72869	0.114597						846	3.33451	1.09303
327	49.6292	4175	5032	212411	50.8769	1.20527	1.70652	0.0810842						848	3.33451	0.85573
327.2	49.6842	4356	4978	212415	48.7638	1.14279	1.6881	0.057967						850	3.33451	0.615686
327.4	49.7392	4360	5418	213058	48.8665	1.24266	1.68901	0.0943525						852	3.33451	0.0213382
327.6	49.7941	4499	6030	209498	46.5655	1.3403	1.66806	0.127201						854	3.33451	0.54346
327.8	49.8491	4252	6740	209599	49.2942	1.58514	1.6928	0.200067						856	3.33451	0.604129
328	49.904	4293	4572	192255	44.7834	1.06499	1.65112	0.0273453						858	3.33451	1.53681
328.2	49.959	4247	5188	204202	48.0815	1.22157	1.68198	0.0869177						860	3.33451	1.42038
328.4	50.0139	4349	5033	202025	46.4532	1.15728	1.66702	0.0634375						862	3.33451	0.822491
328.6	50.0689	4295	5436	199663	46.4873	1.26566	1.66733	0.102316						864	3.33451	1.08348
328.8	50.1239	4324	4989	200626	46.3982	1.15379	1.6665	0.0621278						866	3.33451	1.16667
329	50.1788	4348	5161	200110	46.0235	1.18698	1.66298	0.0744443						868	4.54364	1.69232
329.2	50.2338	4254	5093	206268	48.488	1.19723	1.68563	0.0781762						870	4.54364	3.11269
329.4	50.2887	4192	5143	207262	49.4423	1.22686	1.6941	0.0887953						872	4.54364	2.58268
329.6	50.3437	4518	4958	211279	46.7638	1.09739	1.66991	0.0403603						874	4.54364	0.713933
329.8	50.3986	4344	4737	209188	48.1556	1.09047	1.68265	0.0376136						876	4.54364	0.236732
330	50.4536	4541	5182	205701	45.2986	1.14116	1.65608	0.0573459						878	4.54364	0.254568
330.2	50.5085	4520	5148	200639	44.3892	1.13894	1.64728	0.0565001						880	4.54364	0.350168
330.4	50.5635	4208	4896	193067	45.8809	1.1635	1.66163	0.0657657						882	4.54364	0.269374
330.6	50.6185	3994	4895	183253	45.8821	1.22559	1.66164	0.0883446						884	4.54364	0.382715
330.8	50.6734	3839	4916	183982	47.9245	1.28054	1.68056	0.107394						886	4.54364	0.431488
331	50.7284	3837	5679	186984	48.7318	1.48006	1.68781	0.17028						888	4.54364	0.314155
331.2	50.7833	4089	5283	189543	46.3544	1.292	1.66609	0.111264						890	4.54364	1.43869
331.4	50.8383	4249	4807	189155	44.5175	1.13133	1.64853	0.0535874						892	4.54364	0.350118
331.6	50.8932	4065	4953	193050	47.4908	1.21845	1.67661	0.0858078						894	4.54364	1.91517
331.8	50.9482	3878	5156	194275	50.0967	1.32955	1.69981	0.123705						896	4.54364	0.946889
332	51.0032	3895	5017	191451	49.153	1.28806	1.69155	0.109937						898	4.54364	1.31493
332.2	51.0581	4163	5109	186191	44.7252	1.22724	1.65055	0.0889295						900	1.85337	0.839794
332.4	51.1131	3976	5398	188530	47.417	1.35765	1.67593	0.132787						902	1.85337	0.742209
332.6	51.168	3930	5457	192449	48.9692	1.38855	1.68992	0.142561						904	1.85337	0.659544
332.8	51.223	4010	5168	182367	45.4781	1.28878	1.6578	0.110178						906	1.85337	0.797462
333	51.2779	4146	5392	188351	45.4296	1.30053	1.65734	0.114121						908	1.85337	1.2613
333.2	51.3329	3958	5779	188295	47.5733	1.46008	1.67736	0.164377						910	1.85337	1.15341
333.4	51.3878	4151	5774	191078	46.0318	1.39099	1.66306	0.143324						912	1.85337	0.905593
333.6	51.4428	4172	5510	192434	46.1251	1.32071	1.66394	0.120807						914	1.85337	0.657292
333.8	51.4978	3984	4770	185412	46.5392	1.19729	1.66782	0.078199						916	1.85337	0.280047
334	51.5527	3925	5456	191239	48.7233	1.39006	1.68774	0.143035						918	4.14699	0.862823
334.2	51.6077	3657	5627	190511	52.0949	1.53869	1.7168	0.187152						920	4.14699	0.637711
334.4	51.6626	3664	5864	185642	50.6665	1.60044	1.70472	0.204238						922	4.14699	0.170501
334.6	51.7176	3609	5454	180167	49.9216	1.51122	1.69829	0.179328						924	4.14699	0.100326
334.8	51.7725	4107	5096	185903	45.2649	1.24081	1.65576	0.0937047						926	4.14699	0.796962
335	51.8275	4246	4523	178398	42.0155	1.06524	1.62341	0.0274466						928	4.14699	0.594398
335.2	51.8825	4175	5276	184597	44.2149	1.26371	1.64557	0.101648						930	4.14699	1.00478
335.4	51.9374	4211	6002	182379	43.3101	1.42531	1.63659	0.153911						932	4.14699	0.885978
335.6	51.9924	4104	5911	188319	45.8867	1.4403	1.66169	0.158454						934	4.14699	0.788997
335.8	52.0473	4254	5722	193498	45.4861	1.34509	1.65788	0.12875						936	4.14699	1.04187
336	52.1023	4048	5562	192548	47.5662	1.37401	1.6773	0.13799						938	2.66032	1.06062
336.2	52.1572	3977	5673	187988	47.2688	1.42645	1.67457	0.154257						940	2.66032	0.765815
336.4	52.2122	3943	5546	192840	48.9069	1.40654	1.68937	0.148153						942	2.66032	1.75647
336.6	52.2671	4170	5418	186225	44.6583	1.29928	1.6499	0.113703						944	2.66032	2.02019
336.8	52.3221	3959	5599	192021	48.5024	1.41425	1.68576	0.150525						946	2.66032	2.05849
337	52.3771	4401	5528	194974	44.3022	1.25608	1.64643	0.0990167						948	2.66032	1.98484
337.2	52.432	3918	5809	193116	49.2894	1.48264	1.69275	0.171037						950	2.66032	1.83795
337.4	52.487	3995	5618	190627	47.7164	1.40626	1.67867	0.148065						952	2.66032	1.77665
337.6	52.5419	3982	5519	190372	47.8081	1.38599	1.6795	0.141759						954	2.66032	1.63003
337.8	52.5969	4101	5268	190456	46.4414	1.28456	1.6669	0.108756						956	2.66032	1.43736
338	52.6518	3992	5104	198102	49.6247	1.27856	1.6957	0.10672						958	2.66032	1.57082
338.2	52.7068	4083	5151	202621	49.6255	1.26157	1.69571	0.100912						960	2.66032	0.950505
338.4	52.7618	4335	5049	207856	47.9483	1.16471	1.68077	0.0662163						962	3.94103	0.697755
338.6	52.8167	4405	5010	204918	46.5194	1.13734	1.66763	0.0558918						964	3.94103	0.681011
338.8	52.8717	4044	5484	201819	49.9058	1.35608	1.69815	0.132286						966	3.94103	0.900951
339	52.9266	4096	5846	202533	49.4465	1.42725	1.69414	0.154499						968	3.94103	1.44865
339.2	52.9816	4358	6072	201109	46.1471	1.3933	1.66414	0.144045						970	3.94103	1.16771
339.4	53.0365	4197	5811	204725	48.7789	1.38456	1.68823	0.141312						972	3.94103	1.63371
339.6	53.0915	4028	5485	204339	50.7296	1.36172	1.70526	0.134087						974	3.58811	1.07441
339.8	53.1464	4082	5546	208078	50.9745	1.35865	1.70735	0.133107						976	3.58811	1.43514
340	53.2014	4371	5768	214970	49.181	1.31961	1.6918	0.120444						978	3.58811	0.959051
340.2	53.2564	4372	4541	214067	48.9632	1.03866	1.68987	0.0164713						980	3.58811	1.24331
340.4	53.3113	4323	5288	214191	49.5468	1.22322	1.69502	0.0875062						982	3.58811	0.983468
340.6	53.3663	4195	5394	211448	50.4048	1.28582	1.70247	0.109179						984	3.58811	1.89289
340.8	53.4212	4120	5173	210128	51.0019	1.25558	1.70759	0.0988453						986	3.58811	1.90081
341	53.4762	4171	4890	211265	50.6509	1.17238	1.70459	0.0690687						988	3.58811	1.59146
341.2	53.5311	3792	6812	201905	53.245	1.79641	1.72628	0.254406						990	3.58811	1.94043
341.4	53.5861	3938	6829	197728	50.2103	1.73413	1.70079	0.239081						992	1.82636	1.22213
341.6	53.6411	4014	5001	216047	53.8234	1.24589	1.73097	0.0954795						994	1.82636	0.955625
341.8	53.696	3991	5248	224104	56.1523	1.31496	1.74937	0.118912						996	1.82636	0.461677
342	53.751	4180	5692	226626	54.2167	1.36172	1.73413	0.134089						998	1.82636	0.326981
342.2	53.8059	4240	5245	218548	51.5443	1.23703	1.71218	0.0923796						1000	1.82636	0.351336
342.4	53.8609	4272	5668	217263	50.8574	1.32678	1.70635	0.122799						1002	1.82636	0.482107
342.6	53.9158	4121	5274	215603	52.3181	1.27979	1.71865	0.107138						1004	1.82636	0.646022
342.8	53.9708	4156	5383	217812	52.409	1.29524	1.71941	0.112349						1006	1.82636	0.38585
343	54.0257	4179	4735	216055	51.7002	1.13305	1.71349	0.0542476						1008	1.82636	0.377653
343.2	54.0807	4146	4828	214675	51.7788	1.1645	1.71415	0.066138						1010	1.82636	0.549891
343.4	54.1357	4482	4945	213470	47.6283	1.1033	1.67786	0.0426944						1012	1.82636	0.416667
343.6	54.1906	4300	4798	212375	49.3895	1.11581	1.69363	0.0475918						1014	1.82636	0.893751
343.8	54.2456	4484	5008	216000	48.1713	1.11686	1.68279	0.0479987						1016	3.10105	2.57828
344	54.3005	4137	4885	214952	51.9584	1.18081	1.71566	0.072179						1018	3.10105	1.57519
344.2	54.3555	4270	6058	208911	48.9253	1.41874	1.68953	0.151901						1020	3.10105	0.582653
344.4	54.4104	3988	6078	206323	51.736	1.52407	1.71379	0.183006						1022	3.10105	1.94844
344.6	54.4654	3986	6053	205366	51.5218	1.51856	1.71199	0.181433						1024	3.10105	1.87601
344.8	54.5204	4170	5138	213763	51.2621	1.23213	1.7098	0.090658						1026	3.10105	1.26654
345	54.5753	4418	4391	216040	48.9	0.993889	1.68931	-0.00266227						1028	3.10105	1.83682
345.2	54.6303	4229	5074	220340	52.1022	1.19981	1.71686	0.0791128						1030	3.10105	0.91898
345.4	54.6852	4136	5446	219493	53.0689	1.31673	1.72484	0.119497						1032	3.10105	1.03454
345.6	54.7402	4154	6212	221618	53.3505	1.49543	1.72714	0.174765						1034	3.10105	1.25483
345.8	54.7951	4044	6639	204895	50.6664	1.64169	1.70472	0.215292						1036	3.10105	1.12891
346	54.8501	4156	5750	209969	50.5219	1.38354	1.70348	0.140992						1038	3.10105	1.62987
346.2	54.905	4047	4878	212002	52.385	1.20534	1.71921	0.0811086						1040	3.10105	2.56713
346.4	54.96	4083	4387	210175	51.4756	1.07446	1.7116	0.0311883						1042	3.10105	2.76268
346.6	55.015	4016	4647	206265	51.3608	1.15712	1.71063	0.063379						1044	3.10105	0.928086
346.8	55.0699	4084	4455	206053	50.4537	1.09084	1.70289	0.037762						1046	3.10105	0.726451
347	55.1249	4211	4037	204280	48.511	0.95868	1.68584	-0.0183265						1048	3.10105	0.26701
347.2	55.1798	4428	4613	211230	47.7033	1.04178	1.67855	0.0177758						1050	3.10105	0.402992
347.4	55.2348	4656	4769	214240	46.0137	1.02427	1.66289	0.0104144						1052	3.10105	0.235399
347.6	55.2897	4395	4749	214990	48.917	1.08055	1.68946	0.0336433						1054	3.10105	0.181861
347.8	55.3447	4359	4531	206202	47.3049	1.03946	1.67491	0.0168072						1056	3.10105	0.337947
348	55.3997	4481	4618	214221	47.8065	1.03057	1.67949	0.013079						1058	3.10105	1.24
348.2	55.4546	4437	4900	215492	48.567	1.10435	1.68634	0.0431067						1060	3.10105	1.84073
348.4	55.5096	4488	4251	210718	46.9514	0.947193	1.67165	-0.0235617						1062	3.10105	2.80006
348.6	55.5645	4686	4653	215979	46.0903	0.992958	1.66361	-0.00306923						1064	3.14984	2.65252
348.8	55.6195	4537	4842	209175	46.1043	1.06723	1.66374	0.028256						1066	3.14984	2.34256
349	55.6744	4556	5020	216908	47.6093	1.10184	1.67769	0.04212						1068	3.14984	2.34664
349.2	55.7294	4490	5146	217278	48.3915	1.1461	1.68477	0.0592234						1070	3.14984	1.69027
349.4	55.7843	4417	5132	222247	50.3163	1.16187	1.70171	0.0651592						1072	3.14984	1.82663
349.6	55.8393	4694	4845	219513	46.7646	1.03217	1.66992	0.0137507						1074	3.14984	1.90116
349.8	55.8943	4756	5628	214205	45.0389	1.18335	1.65359	0.0731122						1076	2.26175	0.986122
350	55.9492	4719	6705	216892	45.9614	1.42085	1.66239	0.152549						1078	2.26175	1.39997
350.2	56.0042	4563	7238	213114	46.7048	1.58624	1.66936	0.200368						1080	2.26175	1.91047
350.4	56.0591	4557	6808	217937	47.8247	1.49397	1.67965	0.174341						1082	2.26175	1.54344
350.6	56.1141	4549	6714	214438	47.1396	1.47593	1.67339	0.169065						1084	2.26175	1.04289
350.8	56.169	4228	4536	212599	50.2836	1.07285	1.70143	0.0305381						1086	2.26175	0.905125
351	56.224	4286	4716	217182	50.6724	1.10033	1.70477	0.0415216						1088	2.26175	1.06138
351.2	56.279	4541	5297	209671	46.1729	1.16648	1.66439	0.0668785						1090	2.26175	1.35759
351.4	56.3339	4703	5030	210880	44.8395	1.06953	1.65166	0.029193						1092	2.26175	1.30118
351.6	56.3889	4147	4581	205257	49.4953	1.10465	1.69456	0.0432263						1094	5.85987	3.11012
351.8	56.4438	4569	3989	203590	44.559	0.873058	1.64894	-0.0589571						1096	5.85987	2.55251
352	56.4988	4388	4203	202098	46.057	0.95784	1.6633	-0.0187072						1098	5.85987	3.26949
352.2	56.5537	4391	4471	203259	46.2899	1.01822	1.66549	0.00784123						1100	5.85987	2.10092
352.4	56.6087	4762	5097	217307	45.6336	1.07035	1.65928	0.0295252						1102	5.85987	1.92407
352.6	56.6636	4705	4630	214516	45.5932	0.98406	1.6589	-0.00697864						1104	5.85987	2.58908
352.8	56.7186	4728	4148	215466	45.5723	0.877327	1.6587	-0.0568387						1106	3.04278	1.02573
353	56.7736	5145	4488	219925	42.7454	0.872303	1.63089	-0.0593325						1108	3.04278	1.41139
353.2	56.8285	4847	4470	216320	44.6297	0.92222	1.64962	-0.0351655						1110	3.04278	1.88051
353.4	56.8835	4733	4422	219803	46.4405	0.934291	1.6669	-0.0295178						1112	3.04278	1.18168
353.6	56.9384	4725	4900	214024	45.2961	1.03704	1.65606	0.0157943						1114	3.04278	1.04598
353.8	56.9934	4504	5546	211596	46.9796	1.23135	1.67191	0.0903815						1116	3.04278	1.26104
354	57.0483	4582	5347	211827	46.2302	1.16696	1.66493	0.0670551						1118	3.04278	1.891
354.2	57.1033	4822	4981	214118	44.4044	1.03297	1.64743	0.0140893						1120	3.04278	0.450388
354.4	57.1583	4679	5121	216075	46.1797	1.09446	1.66445	0.0392017						1122	3.04278	0.941756
354.6	57.2132	4688	5437	225279	48.0544	1.15977	1.68173	0.0643717						1124	3.04278	0.80789
354.8	57.2682	4668	4971	225654	48.3406	1.06491	1.68431	0.0273129						1126	3.04278	0.424375
355	57.3231	4916	5368	234357	47.6723	1.09194	1.67827	0.0382006						1128	3.04278	1.24108
355.2	57.3781	4954	5289	233996	47.2338	1.06762	1.67425	0.0284176						1130	3.04278	0.465269
355.4	57.433	4796	5035	231060	48.1776	1.04983	1.68285	0.0211203						1132	3.04278	0.288418
355.6	57.488	5083	4473	228700	44.9931	0.879992	1.65315	-0.0555212						1134	2.30726	0.230662
355.8	57.5429	4537	4544	223260	49.2087	1.00154	1.69204	0.000669543						1136	2.30726	0.739518
356	57.5979	4876	4677	218317	44.7738	0.959188	1.65102	-0.0180963						1138	2.30726	0.559943
356.2	57.6529	4773	4784	222159	46.5449	1.0023	1.66787	0.000999737						1140	2.30726	0.154276
356.4	57.7078	4874	4769	224524	46.0657	0.978457	1.66338	-0.0094582						1142	2.30726	0.454907
356.6	57.7628	4753	4254	221033	46.5039	0.895014	1.66749	-0.0481703						1144	2.30726	0.552579
356.8	57.8177	5009	4347	218232	43.568	0.867838	1.63917	-0.0615614						1146	2.30726	0.358338
357	57.8727	4749	4670	221262	46.5913	0.983365	1.6683	-0.00728529						1148	2.30726	0.466966
357.2	57.9276	4798	4753	225300	46.9571	0.990621	1.6717	-0.00409243						1150	2.30726	0.985837
357.4	57.9826	4756	4412	220373	46.3358	0.92767	1.66592	-0.0326063						1152	3.16507	1.83262
357.6	58.0376	4906	4429	221981	45.2468	0.902772	1.65559	-0.0444219						1154	3.16507	1.03879
357.8	58.0925	4816	4595	227938	47.3293	0.954111	1.67513	-0.020401						1156	3.16507	0.820205
358	58.1475	5190	4583	230084	44.3322	0.883044	1.64672	-0.0540175						1158	3.16507	1.72623
358.2	58.2024	4976	4203	225601	45.3378	0.844654	1.65646	-0.073321						1160	3.16507	1.43902
358.4	58.2574	5068	4266	232789	45.9331	0.841752	1.66213	-0.0748158						1162	3.16507	1.3884
358.6	58.3123	4952	5858	233333	47.1189	1.18296	1.6732	0.0729687						1164	3.16507	1.41199
358.8	58.3673	5278	4487	238399	45.1684	0.850133	1.65484	-0.0705133						1166	3.16507	1.65116
359	58.4222	5176	5156	236934	45.7755	0.996136	1.66063	-0.00168136						1168	3.16507	1.13701
359.2	58.4772	5068	4627	233648	46.1026	0.912983	1.66373	-0.0395371						1170	3.16507	1.28011
359.4	58.5322	5075	8946	235090	46.3232	1.76276	1.6658	0.246193						1172	3.16507	1.34147
359.6	58.5871	4972	5935	232703	46.8027	1.19368	1.67027	0.0768896						1174	3.16507	0.733244
359.8	58.6421	5091	4557	235948	46.3461	0.895109	1.66601	-0.0481241						1176	3.16507	0.471101
360	58.697	5265	4517	245196	46.5709	0.85793	1.66812	-0.0665483						1178	3.16507	0.626286
360.2	58.752	5041	4108	243987	48.4005	0.814918	1.68485	-0.0888863						1180	3.16507	0.878834
360.4	58.8069	4922	4298	247132	50.2097	0.873222	1.70079	-0.0588752						1182	3.16507	0.951378
360.6	58.8619	5036	4540	262391	52.1031	0.901509	1.71686	-0.0450299						1184	3.16507	1.03219
360.8	58.9169	4728	4498	249724	52.8181	0.951354	1.72278	-0.021658						1186	3.16507	0.65981
361	58.9718	4604	4368	274063	59.5272	0.94874	1.77472	-0.0228527						1188	3.16507	0.655594
361.2	59.0268	4159	4504	312346	75.1012	1.08295	1.87565	0.0346095						1190	3.16507	0.518829
361.4	59.0817	4083	5813	285613	69.9518	1.42371	1.8448	0.153421						1192	1.36	0.181863
361.6	59.1367	3953	7300	323386	81.8077	1.8467	1.91279	0.266396						1194	1.36	0.150768
361.8	59.1916	4229	4771	268273	63.4365	1.12816	1.80234	0.0523717						1196	1.36	0.184328
362	59.2466	4315	6044	267929	62.0925	1.4007	1.79304	0.146344						1198	1.36	0.256238
362.2	59.3015	4109	4677	277696	67.5824	1.13823	1.82983	0.0562312						1200	1.36	0.246982
362.4	59.3565	4288	3878	253944	59.222	0.904384	1.77248	-0.043647						1202	1.36	0.212493
362.6	59.4115	4391	3966	238215	54.2507	0.903211	1.73441	-0.0442107						1204	1.36	0.246678
362.8	59.4664	4759	3573	243498	51.1658	0.750788	1.70898	-0.124483						1206	1.36	0.297712
363	59.5214	4543	3658	242604	53.4017	0.805195	1.72756	-0.094099						1208	1.36	0.383972
363.2	59.5763	4533	3491	252758	55.7595	0.77013	1.74632	-0.113436						1210	1.36	0.428974
363.4	59.6313	4323	4164	231507	53.5524	0.96322	1.72878	-0.0162745						1212	1.36	0.343411
363.6	59.6862	4387	5901	233890	53.3143	1.34511	1.72684	0.128758						1214	1.36	0.263179
363.8	59.7412	4104	3874	233067	56.7902	0.943957	1.75427	-0.0250477						1216	3.79562	0.753035
364	59.7962	4009	4236	252547	62.995	1.05662	1.79931	0.0239199						1218	3.79562	0.502183
364.2	59.8511	4496	4192	250172	55.6432	0.932384	1.74541	-0.030405						1220	3.79562	0.0224566
364.4	59.9061	4736	4029	245670	51.8729	0.850718	1.71494	-0.0702144						1222	3.79562	0.373459
364.6	59.961	4800	5528	248350	51.7396	1.15167	1.71382	0.0613268						1224	3.79562	0.481155
364.8	60.016	4404	5321	243641	55.3227	1.20822	1.7429	0.0821459						1226	3.79562	0.945986
365	60.0709	4486	3484	232444	51.8154	0.776638	1.71446	-0.109781						1228	3.79562	2.28528
365.2	60.1259	4818	3722	242786	50.3914	0.77252	1.70236	-0.11209						1230	3.79562	2.70694
365.4	60.1808	4642	3951	241964	52.1249	0.851142	1.71705	-0.0699981						1232	3.79562	2.93874
365.6	60.2358	4431	6672	238259	53.7709	1.50575	1.73055	0.177754						1234	3.79562	3.39146
365.8	60.2908	5005	4204	251246	50.199	0.83996	1.7007	-0.0757414						1236	3.79562	3.11667
366	60.3457	4667	3806	242608	51.9837	0.815513	1.71587	-0.088569						1238	3.79562	2.91571
366.2	60.4007	4632	3504	236675	51.0956	0.756477	1.70838	-0.121204						1240	3.79562	3.20201
366.4	60.4556	4754	3780	237306	49.9171	0.79512	1.69825	-0.0995674						1242	3.79562	2.06388
366.6	60.5106	4504	3716	208125	46.2089	0.825044	1.66473	-0.0835227						1244	3.79562	1.38674
366.8	60.5655	4588	3928	216149	47.1118	0.856146	1.67313	-0.0674519						1246	4.66047	0.574622
367	60.6205	4532	3814	210005	46.3383	0.841571	1.66594	-0.0749092						1248	4.66047	0.662319
367.2	60.6755	4677	3899	219641	46.9619	0.833654	1.67175	-0.0790141						1250	4.66047	1.40214
367.4	60.7304	4679	3904	235730	50.3804	0.834366	1.70226	-0.0786432						1252	4.66047	1.65229
367.6	60.7854	4647	3947	222184	47.8124	0.849365	1.67954	-0.0709055						1254	4.66047	1.62718
367.8	60.8403	4809	3662	220455	45.8422	0.761489	1.66127	-0.118336						1256	4.66047	0.603247
368	60.8953	4627	3917	217645	47.038	0.846553	1.67245	-0.0723459						1258	4.66047	0.0930943
368.2	60.9502	4677	3463	218824	46.7873	0.740432	1.67013	-0.130515						1260	4.66047	0.00436977
368.4	61.0052	4375	3363	216581	49.5042	0.768686	1.69464	-0.114251						1262	4.66047	0.32322
368.6	61.0601	4533	4056	206905	45.6442	0.894772	1.65939	-0.0482878						1264	4.66047	0.387874
368.8	61.1151	4763	4479	207096	43.4802	0.940374	1.63829	-0.0266995						1266	4.66047	1.81178
369	61.1701	4448	4269	209220	47.0369	0.959757	1.67244	-0.0178386						1268	4.66047	1.7526
369.2	61.225	4605	3910	214034	46.4786	0.849077	1.66725	-0.0710529						1270	4.66047	2.27633
369.4	61.28	4864	4033	222531	45.7506	0.829153	1.6604	-0.0813653						1272	4.66047	1.61008
369.6	61.3349	5120	4136	228574	44.6434	0.807813	1.64976	-0.0926894						1274	4.66047	2.8102
369.8	61.3899	4818	4480	227418	47.2017	0.929846	1.67396	-0.0315888						1276	4.66047	1.53928
370	61.4448	4741	4190	224917	47.4408	0.88378	1.67615	-0.0536559						1278	4.66047	1.16489
370.2	61.4998	4759	4425	231482	48.6409	0.929817	1.687	-0.0316024						1280	4.66047	1.02691
370.4	61.5548	4915	4245	228321	46.4539	0.863683	1.66702	-0.0636458						1282	4.66047	0.749706
370.6	61.6097	4913	4295	224172	45.6283	0.874211	1.65923	-0.0583836						1284	4.66047	1.08084
370.8	61.6647	4630	4733	220935	47.7181	1.02225	1.67868	0.00955551						1286	3.67493	0.447325
371	61.7196	4776	4702	233925	48.9793	0.984506	1.69001	-0.00678169						1288	3.67493	0.175
371.2	61.7746	4733	4419	237399	50.1583	0.933657	1.70034	-0.0298125						1290	3.67493	0.369676
371.4	61.8295	4770	4469	236028	49.4818	0.936897	1.69445	-0.028308						1292	3.67493	0.278691
371.6	61.8845	4796	4416	232544	48.4871	0.920767	1.68563	-0.0358501						1294	3.67493	0.56437
371.8	61.9394	4735	4383	236401	49.9263	0.92566	1.69833	-0.0335485						1296	3.67493	0.472114
372	61.9944	4924	3987	233112	47.342	0.809708	1.67525	-0.0916718						1298	3.67493	0.758772
372.2	62.0494	4809	4541	230564	47.9443	0.944271	1.68074	-0.0249033						1300	3.67493	1.04437
372.4	62.1043	5169	4720	231576	44.8009	0.913136	1.65129	-0.0394645						1302	3.67493	1.33675
372.6	62.1593	5233	4537	230280	44.0054	0.866998	1.64351	-0.061982						1304	3.67493	1.89996
372.8	62.2142	5138	4376	221992	43.2059	0.851693	1.63554	-0.0697168						1306	3.67493	1.48512
373	62.2692	5359	4406	225475	42.0741	0.822168	1.62401	-0.0850393						1308	3.67493	1.03872
373.2	62.3241	5435	4254	222565	40.9503	0.782705	1.61226	-0.106402						1310	3.67493	2.15114
373.4	62.3791	5657	4412	227054	40.1368	0.779919	1.60354	-0.107951						1312	3.67493	1.85216
373.6	62.4341	5281	4626	227927	43.1598	0.87597	1.63508	-0.0575105						1314	3.67493	1.41456
373.8	62.489	5483	4502	227659	41.5209	0.821083	1.61827	-0.0856128						1316	3.67493	1.4228
374	62.544	5231	4471	223264	42.6809	0.854712	1.63023	-0.0681801						1318	3.67493	0.90537
374.2	62.5989	5071	4712	218857	43.1585	0.929205	1.63507	-0.0318883						1320	3.67493	0.492302
374.4	62.6539	5122	4529	221651	43.2743	0.884225	1.63623	-0.0534373						1322	3.45524	0.646007
374.6	62.7088	5019	4268	223883	44.6071	0.850369	1.6494	-0.0703928						1324	3.45524	0.226236
374.8	62.7638	4712	4441	222336	47.1851	0.942487	1.6738	-0.0257245						1326	3.45524	0.702783
375	62.8187	4860	4326	220410	45.3519	0.890123	1.6566	-0.0505498						1328	3.45524	0.297629
375.2	62.8737	5014	4360	218129	43.504	0.869565	1.63853	-0.0606978						1330	3.45524	0.601612
375.4	62.9287	4997	4152	217254	43.4769	0.830899	1.63826	-0.080452						1332	3.45524	0.890487
375.6	62.9836	5287	3867	220132	41.6365	0.731417	1.61947	-0.135835						1334	3.45524	1.84964
375.8	63.0386	4837	3644	216860	44.8336	0.75336	1.6516	-0.122998						1336	3.45524	1.93286
376	63.0935	4933	4004	221399	44.8812	0.811676	1.65206	-0.090617						1338	3.45524	2.24567
376.2	63.1485	5235	4605	217488	41.545	0.879656	1.61852	-0.0556871						1340	3.45524	2.78329
376.4	63.2034	5209	4709	220294	42.291	0.904012	1.62625	-0.0438257						1342	3.45524	2.14772
376.6	63.2584	5007	4697	214567	42.8534	0.938087	1.63199	-0.027757						1344	3.45524	1.85243
376.8	63.3134	4958	3931	217332	43.8346	0.79286	1.64182	-0.100803						1346	3.45524	1.6429
377	63.3683	5189	3998	210096	40.4887	0.770476	1.60733	-0.113241						1348	3.45524	1.44691
377.2	63.4233	5088	4480	216188	42.4898	0.880503	1.62828	-0.0552691						1350	3.45524	1.63629
377.4	63.4782	5015	4263	217886	43.4469	0.85005	1.63796	-0.0705556						1352	3.45524	1.25451
377.6	63.5332	5073	4300	221214	43.6062	0.847625	1.63955	-0.0717964						1354	3.45524	0.921847
377.8	63.5881	5029	4433	217830	43.3148	0.881487	1.63664	-0.0547839						1356	3.45524	0.973904
378	63.6431	5022	4307	216887	43.1874	0.857626	1.63536	-0.0667018						1358	3.45524	1.38963
378.2	63.698	5431	4265	215308	39.6443	0.785307	1.59818	-0.104961						1360	3.45524	1.13759
378.4	63.753	5093	4556	212111	41.6476	0.894561	1.61959	-0.04839						1362	3.45524	0.564577
378.6	63.808	5145	4481	216360	42.0525	0.870943	1.62379	-0.0600104						1364	2.7768	0.611274
378.8	63.8629	4900	4258	214465	43.7684	0.86898	1.64116	-0.0609904						1366	2.7768	0.333093
379	63.9179	5233	4682	208221	39.79	0.894707	1.59977	-0.0483193						1368	2.7768	0.592449
379.2	63.9728	4815	4882	214529	44.5543	1.01391	1.64889	0.00600148						1370	2.7768	1.11994
379.4	64.0278	5096	4675	215633	42.3142	0.917386	1.62649	-0.0374478						1372	2.7768	1.60497
379.6	64.0827	4904	4758	212458	43.3234	0.970228	1.63672	-0.013126						1374	2.7768	2.12124
379.8	64.1377	5240	4868	218512	41.7008	0.929008	1.62014	-0.0319807						1376	2.7768	1.66729
380	64.1927	4964	5507	221466	44.6144	1.10939	1.64948	0.0450833						1378	2.7768	1.49167
380.2	64.2476	5324	5152	221865	41.6726	0.967693	1.61985	-0.0142622						1380	2.7768	1.92113
380.4	64.3026	5387	5299	227911	42.3076	0.983664	1.62642	-0.00715306						1382	2.7768	2.02001
380.6	64.3575	5526	5398	230927	41.7892	0.976837	1.62106	-0.010178						1384	2.7768	1.10402
380.8	64.4125	5365	5362	223356	41.6321	0.999441	1.61943	-0.000242917						1386	2.7768	1.71327
381	64.4674	5256	5285	221657	42.1722	1.00552	1.62503	0.00238964						1388	2.7768	1.56303
381.2	64.5224	5164	5281	217961	42.2078	1.02266	1.62539	0.00972993						1390	2.7768	1.24746
381.4	64.5773	5285	5149	220561	41.7334	0.974267	1.62048	-0.0113221						1392	2.7768	0.794943
381.6	64.6323	5271	5449	226040	42.8837	1.03377	1.63229	0.0144238						1394	2.7768	1.03226
381.8	64.6873	5230	5457	225454	43.1078	1.0434	1.63456	0.0184523						1396	2.7768	1.54779
382	64.7422	5336	5621	225846	42.325	1.05341	1.6266	0.0225978						1398	2.7768	1.82959
382.2	64.7972	5450	5519	225463	41.3694	1.01266	1.61668	0.00546389						1400	2.7768	1.8931
382.4	64.8521	5379	5628	221520	41.1824	1.04629	1.61471	0.0196525						1402	2.7768	1.64263
382.6	64.9071	5400	5563	230207	42.6309	1.03019	1.62972	0.0129153						1404	2.7768	1.95134
382.8	64.962	5321	5302	229591	43.1481	0.996429	1.63496	-0.00155354						1406	2.7768	1.9706
383	65.017	5151	5570	227075	44.0837	1.08134	1.64428	0.0339636						1408	2.7768	2.3387
#REF!	65.072	5035	5659	222362	44.1633	1.12393	1.64506	0.0507402						1410	3.75234	2.6314
#REF!	65.1269	4590	5055	205420	44.7538	1.10131	1.65083	0.0419085						1412	3.75234	1.98943
#REF!	65.5116	5317	4321	224771	42.274	0.812676	1.62607	-0.0900824						1414	3.75234	0.890765
#REF!	65.5666	4711	4260	212501	45.1074	0.904267	1.65425	-0.0437035						1416	3.75234	1.74165
#REF!	65.6215	4741	4496	212779	44.8806	0.948323	1.65206	-0.0230437						1418	3.75234	1.41828
#REF!	65.6765	5415	4594	216887	40.053	0.848384	1.60264	-0.0714075						1420	3.75234	2.70246
#REF!	65.7314	5037	4988	215591	42.8015	0.990272	1.63146	-0.00424551						1422	3.75234	4.53278
#REF!	65.7864	4775	5097	212272	44.4549	1.06743	1.64792	0.0283413						1424	3.75234	3.50235
#REF!	65.8413	5013	5166	219504	43.787	1.03052	1.64134	0.0130567						1426	3.75234	4.18504
#REF!	65.8963	5062	4827	223945	44.2404	0.953576	1.64582	-0.0206448						1428	2.87678	2.95828
#REF!	65.9513	4709	4841	218871	46.4793	1.02803	1.66726	0.0120064						1430	2.87678	2.94472
#REF!	66.0062	4893	4887	208091	42.5283	0.998774	1.62868	-0.000532877						1432	2.87678	2.16336
#REF!	66.0612	4853	4789	207978	42.8556	0.986812	1.63201	-0.00576545						1434	2.87678	1.74414
#REF!	66.1161	4873	4939	211720	43.4476	1.01354	1.63797	0.00584261						1436	2.87678	2.05476
#REF!	66.1711	5157	4986	218067	42.2856	0.966841	1.62619	-0.0146449						1438	2.87678	2.05542
#REF!	66.226	4940	4928	215599	43.6435	0.997571	1.63992	-0.00105625						1440	2.87678	2.19341
#REF!	66.281	5223	4860	219552	42.0356	0.9305	1.62362	-0.0312838						1442	2.87678	2.22559
#REF!	66.3359	5125	5011	225005	43.9034	0.977756	1.6425	-0.00976947						1444	2.87678	1.96256
#REF!	66.3909	5361	5132	224108	41.8034	0.957284	1.62121	-0.0189592						1446	2.87678	1.72124
#REF!	66.4459	4899	5185	216752	44.2441	1.05838	1.64586	0.0246413						1448	2.87678	2.12939
#REF!	66.5008	4928	5102	214518	43.5304	1.03531	1.63879	0.0150698						1450	2.87678	1.78117
#REF!	66.5558	4934	4943	217756	44.1338	1.00182	1.64477	0.000791465						1452	2.87678	0.781949
#REF!	66.6107	5083	5391	221726	43.6211	1.06059	1.6397	0.0255492						1454	6.26486	0.462085
#REF!	66.6657	5242	5586	218682	41.7173	1.06562	1.62032	0.0276039						1456	6.26486	0.0807984
#REF!	66.7206	5128	5733	220201	42.9409	1.11798	1.63287	0.0484339						1458	6.26486	0.245464
#REF!	66.7756	5138	5309	215606	41.963	1.03328	1.62287	0.0142186						1460	6.26486	0
#REF!	66.8306	5288	5575	223034	42.1774	1.05427	1.62508	0.0229534						1462	6.26486	1.46196
#REF!	66.8855	5138	5602	222948	43.392	1.09031	1.63741	0.037549						1464	6.26486	2.75673
#REF!	66.9405	5166	5812	223316	43.228	1.12505	1.63577	0.0511712						1466	6.26486	6.14159
#REF!	66.9954	5036	5495	219990	43.6835	1.09114	1.64032	0.037882						1468	6.26486	6.95443
#REF!	67.0504	5311	5686	214951	40.4728	1.07061	1.60716	0.0296306						1470	2.55059	2.78662
#REF!	67.1053	4994	5619	216127	43.2773	1.12515	1.63626	0.0512105						1472	2.55059	3.3976
#REF!	67.1603	5160	5655	220765	42.7839	1.09593	1.63128	0.0397829						1474	2.55059	3.20473
#REF!	67.2152	5062	5938	222274	43.9103	1.17305	1.64257	0.0693181						1476	2.55059	3.1776
#REF!	67.2702	5367	6028	223982	41.7332	1.12316	1.62048	0.0504416						1478	2.55059	1.9023
#REF!	67.3252	4941	5665	218095	44.1399	1.14653	1.64483	0.0593851						1480	2.55059	2.19558
#REF!	67.3801	5286	5454	216277	40.9151	1.03178	1.61188	0.013588						1482	2.55059	4.51435
#REF!	67.4351	5131	5747	218318	42.5488	1.12005	1.62889	0.0492392						1484	2.55059	4.42064
#REF!	67.49	4874	6119	217526	44.6299	1.25544	1.64963	0.0987949						1486	2.55059	4.21373
#REF!	67.545	5071	6146	214143	42.2289	1.21199	1.62561	0.0834989						1488	2.55059	3.75202
#REF!	67.5999	4882	5311	211605	43.3439	1.08787	1.63693	0.0365785						1490	2.55059	3.35482
#REF!	67.6549	5008	5223	214871	42.9056	1.04293	1.63251	0.0182557						1492	2.55059	2.57424
#REF!	67.7099	4792	5209	214294	44.7191	1.08702	1.65049	0.0362375						1494	2.55059	2.14969
#REF!	67.7648	4849	5788	214244	44.1831	1.19365	1.64526	0.0768763						1496	3.29447	3.11264
#REF!	67.8198	5071	5516	213906	42.1822	1.08775	1.62513	0.0365306						1498	3.29447	2.04546
#REF!	67.8747	5049	5323	217021	42.983	1.05427	1.6333	0.0229511						1500	3.29447	1.0195
#REF!	67.9297	4800	5632	213192	44.415	1.17333	1.64753	0.0694214						1502	3.29447	1.21533
#REF!	67.9846	4784	6546	213198	44.5648	1.36831	1.64899	0.136185						1504	3.29447	2.12388
#REF!	68.0396	4646	6204	210623	45.3343	1.33534	1.65643	0.125593						1506	3.29447	1.21414
#REF!	68.0945	4687	5463	208956	44.582	1.16556	1.64916	0.0665362						1508	3.29447	2.38172
#REF!	68.1495	4737	5476	204685	43.2098	1.15601	1.63558	0.0629601						1510	3.29447	2.95046
#REF!	68.2045	4820	5641	213941	44.3861	1.17033	1.64725	0.0683091						1512	2.13161	1.68854
#REF!	68.2594	4835	5616	209172	43.262	1.16153	1.63611	0.0650306						1514	2.13161	1.42481
#REF!	68.3144	4783	5617	210302	43.9686	1.17437	1.64314	0.069804						1516	2.13161	1.46038
#REF!	68.3693	4747	6234	210286	44.2987	1.31325	1.64639	0.118348						1518	2.13161	1.57138
#REF!	68.4243	4710	6146	210997	44.7977	1.30488	1.65126	0.115572						1520	2.13161	1.90658
#REF!	68.4792	5032	5757	211487	42.0284	1.14408	1.62354	0.0584556						1522	2.13161	1.35327
#REF!	68.5342	4929	5658	206326	41.8596	1.1479	1.6218	0.0599041						1524	2.13161	1.57492
#REF!	68.5892	4657	5465	203190	43.6311	1.1735	1.6398	0.0694839						1526	2.13161	2.01004
#REF!	68.6441	4732	5369	206304	43.5976	1.13462	1.63946	0.0548487						1528	2.13161	1.7828
#REF!	68.6991	4565	5254	208413	45.6545	1.15093	1.65948	0.0610493						1530	2.13161	1.48936
#REF!	68.754	4718	5228	209592	44.4239	1.1081	1.64762	0.0445776						1532	2.13161	1.62557
#REF!	68.809	4891	5498	207095	42.3421	1.12411	1.62677	0.0508071						1534	2.82903	1.18721
#REF!	68.8639	4582	5693	206776	45.1279	1.24247	1.65445	0.0942861						1536	2.82903	1.04207
#REF!	68.9189	4457	5405	206964	46.4357	1.2127	1.66685	0.0837531						1538	2.82903	0.868477
#REF!	68.9738	4454	5388	202390	45.4401	1.2097	1.65744	0.0826774						1540	2.82903	0.440402
#REF!	69.0288	4439	5548	202190	45.5485	1.24983	1.65847	0.0968513						1542	2.82903	1.02101
#REF!	69.0838	4562	5392	203498	44.6072	1.18194	1.6494	0.0725946						1544	2.82903	1.13184
#REF!	69.1387	4499	5207	204857	45.5339	1.15737	1.65833	0.0634716						1546	2.82903	0.386851
#REF!	69.1937	4503	5474	204456	45.4044	1.21563	1.6571	0.0848028						1548	2.82903	1.48822
#REF!	69.2486	4549	5316	199008	43.7476	1.16861	1.64095	0.067669						1550	2.82903	2.06979
#REF!	69.3036	4285	5056	189071	44.1239	1.17993	1.64467	0.0718562						1552
#REF!	69.3585	4526	5169	200050	44.2002	1.14207	1.64542	0.057692
#REF!	69.4135	4497	5475	202841	45.1058	1.21748	1.65423	0.0854612
#REF!	69.4685	4419	5851	203569	46.0668	1.32406	1.66339	0.121906
#REF!	69.5234	4505	5966	201057	44.6297	1.32431	1.64962	0.121988
#REF!	69.5784	4512	5630	199852	44.2934	1.24778	1.64634	0.0961393
#REF!	69.6333	4520	5797	200946	44.4571	1.28252	1.64794	0.108065
#REF!	69.6883	4492	5538	204533	45.5327	1.23286	1.65832	0.0909132
#REF!	69.7432	4564	5800	202582	44.3869	1.27082	1.64726	0.104082
#REF!	69.7982	4299	6367	196414	45.6883	1.48104	1.6598	0.170567
#REF!	69.8531	4441	6630	198623	44.7248	1.49291	1.65055	0.174033
#REF!	69.9081	4294	5277	198633	46.2583	1.22892	1.66519	0.0895251
#REF!	69.9631	4117	5398	199910	48.5572	1.31115	1.68625	0.117652
#REF!	70.018	4143	5664	201644	48.671	1.36713	1.68727	0.135808
#REF!	70.073	4181	6093	203070	48.5697	1.45731	1.68637	0.163551
#REF!	70.1279	4318	5502	194927	45.1429	1.2742	1.65459	0.105238
#REF!	70.1829	4027	4945	189292	47.0057	1.22796	1.67215	0.0891847
#REF!	70.2378	4185	4955	187212	44.7341	1.18399	1.65064	0.0733482
#REF!	70.2928	4076	5089	189215	46.4217	1.24853	1.66672	0.0963983
#REF!	70.3478	4285	4794	184501	43.0574	1.11879	1.63405	0.0487472
#REF!	70.4027	4111	5485	184990	44.9988	1.33423	1.6532	0.125229
#REF!	70.4577	4198	6120	192341	45.8173	1.45784	1.66103	0.163709
#REF!	70.5126	4195	6252	188991	45.0515	1.49035	1.65371	0.173287
#REF!	70.5676	3996	6077	183645	45.9572	1.52077	1.66235	0.182064
#REF!	70.6225	4001	5594	182450	45.6011	1.39815	1.65898	0.145554
#REF!	70.6775	4185	5351	180275	43.0765	1.27861	1.63424	0.106739
#REF!	70.7324	4088	6457	184265	45.0746	1.5795	1.65393	0.19852
#REF!	70.7874	4106	6022	189016	46.0341	1.46663	1.66308	0.166322
#REF!	70.8424	4123	4862	181460	44.0116	1.17924	1.64357	0.0716016
#REF!	70.8973	3740	4500	173820	46.4759	1.20321	1.66723	0.0803409
#REF!	70.9523	4463	5216	185110	41.4766	1.16872	1.6178	0.0677107
#REF!	71.0072	3904	5015	182392	46.7193	1.28458	1.6695	0.108761
#REF!	71.0622	3676	5136	181255	49.3077	1.39717	1.69291	0.14525
#REF!	71.1171	4009	5377	184458	46.011	1.34123	1.66286	0.127504
#REF!	71.1721	3732	5579	180456	48.3537	1.49491	1.68443	0.174615
#REF!	71.2271	3824	5724	183251	47.9213	1.49686	1.68053	0.175182
#REF!	71.282	3916	5283	178777	45.653	1.34908	1.65947	0.130038
#REF!	71.337	3991	5585	177196	44.3989	1.3994	1.64737	0.145941
#REF!	71.4037	3912	5009	179278	45.8277	1.28042	1.66113	0.107352
#REF!	71.4762	3941	4611	178807	45.371	1.17001	1.65678	0.0681887
#REF!	71.5487	3864	4924	181743	47.0349	1.27433	1.67242	0.105281
#REF!	71.6212	4290	5683	190017	44.293	1.32471	1.64634	0.12212
#REF!	71.6937	3890	6009	177877	45.7267	1.54473	1.66017	0.188853
#REF!	71.7662	3712	5307	159805	43.0509	1.42969	1.63398	0.155241
#REF!	71.8388	3552	5073	153154	43.1177	1.42821	1.63466	0.154792
#REF!	71.9113	3340	4914	154629	46.2961	1.47126	1.66554	0.167689
#REF!	71.9838	3283	4955	150831	45.943	1.50929	1.66222	0.178773
#REF!	72.0563	3022	4862	147427	48.7846	1.60887	1.68828	0.20652
#REF!	72.1288	3785	6405	204073	53.9162	1.69221	1.73172	0.228453
#REF!	72.2013	4009	5595	216034	53.8873	1.39561	1.73149	0.144764
#REF!	72.2738	4093	5507	216238	52.8312	1.34547	1.72289	0.128873
#REF!	72.3464	4334	5562	220775	50.9402	1.28334	1.70706	0.108342
#REF!	72.4189	4228	5776	225278	53.2824	1.36613	1.72658	0.135492
#REF!	72.4914	4793	6328	227548	47.4751	1.32026	1.67647	0.120659
#REF!	72.5639	4459	5518	228012	51.1352	1.2375	1.70872	0.0925442
#REF!	72.6364	4237	5551	222304	52.4673	1.31013	1.71989	0.117313
#REF!	72.7089	4388	5077	231111	52.6689	1.15702	1.72155	0.0633405
#REF!	72.7815	4478	5636	227269	50.7523	1.2586	1.70546	0.0998869
#REF!	72.854	4545	5396	214253	47.1404	1.18724	1.67339	0.0745381
#REF!	72.9265	4293	6099	216532	50.4384	1.42068	1.70276	0.152498
#REF!	72.999	4384	5196	214638	48.9594	1.18522	1.68984	0.0737986
#REF!	73.0715	4284	4938	206375	48.1734	1.15266	1.68281	0.0617016
#REF!	73.144	4474	5603	213869	47.8026	1.25235	1.67945	0.0977246
#REF!	73.2166	4499	5162	215229	47.8393	1.14737	1.67978	0.059702
#REF!	73.2891	4778	5550	215411	45.0839	1.16157	1.65402	0.0650468
#REF!	73.3616	4742	5379	216688	45.6955	1.13433	1.65987	0.05474
#REF!	73.4341	4436	5455	217111	48.943	1.22971	1.68969	0.0898032
#REF!	73.5066	4610	5016	221123	47.9659	1.08807	1.68093	0.0366566
#REF!	73.5791	4499	4771	214272	47.6266	1.06046	1.67785	0.0254934
#REF!	73.6517	4538	4999	219730	48.42	1.10159	1.68502	0.0420186
#REF!	73.7242	4284	5199	220650	51.5056	1.21359	1.71185	0.0840704
#REF!	73.7967	4376	5424	216809	49.545	1.23949	1.695	0.0932424
#REF!	73.8692	4460	5305	213497	47.8693	1.18946	1.68006	0.0753505
#REF!	73.9417	4484	5846	215010	47.9505	1.30375	1.68079	0.115193
#REF!	74.0142	4359	5460	209563	48.0759	1.25258	1.68193	0.0978058
#REF!	74.0868	4592	5684	208574	45.4212	1.2378	1.65726	0.0926522
#REF!	74.1593	4545	5591	203620	44.8009	1.23014	1.65129	0.0899556
#REF!	74.2318	4443	6477	203492	45.8006	1.4578	1.66087	0.163698
#REF!	74.3043	4328	6255	204152	47.1701	1.44524	1.67367	0.15994
#REF!	74.3768	4374	6196	205485	46.9787	1.41655	1.6719	0.151233
#REF!	74.4493	4523	6001	203358	44.9609	1.32677	1.65283	0.122797
#REF!	74.5218	4315	5734	206639	47.8885	1.32885	1.68023	0.123477
#REF!	74.5944	4236	6341	204340	48.2389	1.49693	1.6834	0.175202
#REF!	74.6669	3832	6460	196369	51.2445	1.6858	1.70965	0.226807
#REF!	74.7394	4043	7165	199278	49.2896	1.7722	1.69276	0.248512
#REF!	74.8119	4086	6712	199447	48.8123	1.64268	1.68853	0.215554
#REF!	74.8844	4167	5954	200021	48.0012	1.42885	1.68125	0.154985
#REF!	74.9569	4082	5705	206840	50.6712	1.3976	1.70476	0.145383
#REF!	75.0295	4140	6155	200470	48.4227	1.48671	1.68505	0.172228
#REF!	75.102	4225	6549	200182	47.3804	1.55006	1.6756	0.190348
#REF!	75.1745	3842	6257	195014	50.7585	1.62858	1.70551	0.211809
#REF!	75.247	4455	6092	197495	44.3311	1.36745	1.64671	0.135912
#REF!	75.3195	4425	6022	205661	46.4771	1.3609	1.66724	0.133827
#REF!	75.392	4775	5694	203694	42.6584	1.19246	1.63	0.0764441
#REF!	75.4646	4573	5822	201540	44.0717	1.27312	1.64416	0.104871
#REF!	75.5371	4201	6016	197407	46.9905	1.43204	1.67201	0.155955
#REF!	75.6096	4455	5703	199973	44.8873	1.28013	1.65212	0.107256
#REF!	75.6821	4223	5875	198373	46.9744	1.39119	1.67186	0.143387
#REF!	75.7546	4311	8142	202303	46.9272	1.88866	1.67142	0.276153
#REF!	75.8271	4073	8108	195156	47.9146	1.99067	1.68047	0.298999
#REF!	75.8997	4187	6422	190838	45.5787	1.5338	1.65876	0.185767
#REF!	75.9722	4337	6066	199937	46.1003	1.39866	1.6637	0.145713
#REF!	76.0447	4372	6276	199990	45.7434	1.4355	1.66033	0.157003
#REF!	76.1172	4193	6840	201647	48.0913	1.63129	1.68207	0.212531
#REF!	76.1897	4067	6972	209576	51.5309	1.71429	1.71207	0.234083
#REF!	76.2622	4176	6540	209814	50.2428	1.56609	1.70107	0.194817
#REF!	76.3348	4159	7101	212365	51.0616	1.70738	1.70809	0.232331
#REF!	76.4073	4180	8074	216386	51.767	1.93158	1.71405	0.285912
#REF!	76.4798	3882	8683	215146	55.4214	2.23673	1.74368	0.349614
#REF!	76.5523	3794	7578	210566	55.4997	1.99736	1.74429	0.300457
#REF!	76.6248	3757	8512	204138	54.3354	2.26564	1.73508	0.35519
#REF!	76.6973	4312	6570	206060	47.7876	1.52365	1.67931	0.182887
#REF!	76.7698	4144	6771	204917	49.4491	1.63393	1.69416	0.213233
#REF!	76.8424	4315	6798	202777	46.9935	1.57543	1.67204	0.1974
#REF!	76.9149	4186	7882	199727	47.7131	1.88294	1.67864	0.274837
#REF!	76.9874	4223	7746	204877	48.5146	1.83424	1.68587	0.263456
#REF!	77.0599	4396	6334	202537	46.073	1.44086	1.66345	0.15862
#REF!	77.1324	4555	6894	212446	46.6402	1.5135	1.66876	0.179983
#REF!	77.2049	4233	6038	205707	48.596	1.42641	1.6866	0.154245
#REF!	77.2775	4166	6502	204729	49.1428	1.56073	1.69146	0.193328
#REF!	77.35	4199	6542	207416	49.3965	1.55799	1.6937	0.192565
#REF!	77.4225	4311	6356	215508	49.9903	1.47437	1.69889	0.168606
#REF!	77.495	4260	6219	211050	49.5423	1.45986	1.69498	0.164311
#REF!	77.5675	4240	5448	204773	48.2955	1.28491	1.68391	0.108871
#REF!	77.64	3915	5788	197374	50.4148	1.47842	1.70256	0.169797
#REF!	77.7126	4098	5522	207266	50.5774	1.34749	1.70396	0.129524
#REF!	77.7851	4049	5753	208619	51.5236	1.42084	1.71201	0.152547
#REF!	77.8576	4113	5617	204732	49.7768	1.36567	1.69703	0.135346
#REF!	77.9301	4018	5211	196528	48.9119	1.29691	1.68941	0.112911
#REF!	78.0026	3709	5034	183111	49.3694	1.35724	1.69346	0.132656
#REF!	78.0751	3827	5319	181934	47.5396	1.38986	1.67706	0.142972
#REF!	78.1477	3708	5131	177403	47.8433	1.38376	1.67982	0.141062
#REF!	78.2202	3876	5288	188058	48.5186	1.36429	1.68591	0.134908
#REF!	78.2927	4105	5548	193254	47.0777	1.35152	1.67282	0.130823
#REF!	78.3652	4269	5661	201311	47.1565	1.32607	1.67354	0.122567
#REF!	78.4377	4133	6168	210362	50.8981	1.49238	1.7067	0.173879
#REF!	78.5102	4137	5909	201398	48.6821	1.42833	1.68737	0.154828
#REF!	78.5828	4258	5937	200821	47.1632	1.39432	1.6736	0.144361
#REF!	78.6553	4100	6557	201852	49.2322	1.59927	1.69225	0.203921
#REF!	78.7278	3976	6343	199851	50.2643	1.59532	1.70126	0.202848
#REF!	78.8003	4226	7213	202048	47.8107	1.70681	1.67953	0.232186
#REF!	78.8728	4200	7076	201373	47.946	1.68476	1.68075	0.226539
#REF!	78.9453	4275	6480	197291	46.1499	1.51579	1.66417	0.180639
#REF!	79.0178	3965	6965	195220	49.2358	1.75662	1.69228	0.244678
#REF!	79.0904	3789	7894	193612	51.0984	2.0834	1.70841	0.318773
#REF!	79.1629	3816	7482	193024	50.5828	1.96069	1.704	0.292409
#REF!	79.2354	3711	7147	196432	52.9324	1.9259	1.72372	0.284633
#REF!	79.3079	4038	5736	197728	48.9668	1.42051	1.6899	0.152443
#REF!	79.3804	4016	5240	195357	48.6447	1.30478	1.68704	0.115538
#REF!	79.4529	3878	5178	192698	49.69	1.33522	1.69627	0.125554
#REF!	79.5255	3629	5281	192091	52.9322	1.45522	1.72372	0.162929
#REF!	79.598	3757	5421	190094	50.5973	1.44291	1.70413	0.159238
#REF!	79.6705	3565	5798	183566	51.4912	1.62637	1.71173	0.211219
#REF!	79.743	3551	6195	186917	52.6378	1.74458	1.7213	0.241691
#REF!	79.8155	3720	6087	182301	49.0056	1.63629	1.69025	0.21386
#REF!	79.888	4045	4583	179931	44.4823	1.133	1.64819	0.0542313
#REF!	79.9606	3288	5130	184918	56.2403	1.56022	1.75005	0.193186
#REF!	80.0331	3349	5714	183005	54.6447	1.70618	1.73755	0.232025
#REF!	80.1056	3233	5417	181502	56.1404	1.67553	1.74928	0.224153
#REF!	80.1781	3361	5667	181185	53.9081	1.68611	1.73165	0.226885
#REF!	80.2506	3333	6245	183519	55.0612	1.87369	1.74085	0.272697
#REF!	80.3231	3826	6218	194703	50.8894	1.6252	1.70663	0.210906
#REF!	80.3957	3837	6234	198029	51.6104	1.62471	1.71274	0.210775
#REF!	80.4682	3653	6029	195974	53.6474	1.65042	1.72955	0.217596
#REF!	80.5407	3891	6246	193554	49.744	1.60524	1.69674	0.205541
#REF!	80.6132	3482	6364	186509	53.5638	1.82769	1.72887	0.261901
#REF!	80.6857	3449	5543	181347	52.5796	1.60713	1.72082	0.206052
#REF!	80.7582	3170	4890	163257	51.5006	1.54259	1.71181	0.18825
#REF!	80.8308	2622	4357	147351	56.1979	1.66171	1.74972	0.220555
#REF!	80.9033	2188	3660	125677	57.4392	1.67276	1.75921	0.223434
#REF!	81.0483	2149	3387	129481	60.2517	1.57608	1.77997	0.197579
#REF!	81.1208	2119	3621	130953	61.7994	1.70882	1.79098	0.232698
#REF!	81.1933	2162	3771	135459	62.6545	1.74422	1.79695	0.241601
#REF!	81.2659	2615	3967	146490	56.0191	1.51702	1.74834	0.180991
#REF!	81.3384	2717	4168	151078	55.6047	1.53404	1.74511	0.185838
#REF!	81.4109	2456	4019	146175	59.5175	1.6364	1.77464	0.21389
#REF!	81.4834	2462	4044	140892	57.2266	1.64257	1.7576	0.215523
#REF!	81.5559	2588	4215	144410	55.7998	1.62867	1.74663	0.211833
#REF!	81.6284	2850	4713	152041	53.3477	1.65368	1.72712	0.218453
#REF!	81.7009	2867	5390	163890	57.1643	1.88001	1.75712	0.274161
#REF!	81.7735	3260	6646	185553	56.9181	2.03865	1.75525	0.309343
#REF!	81.846	3450	6570	186049	53.9272	1.90435	1.73181	0.279746
#REF!	81.9185	3239	6320	184516	56.967	1.95122	1.75562	0.290306
#REF!	81.991	3317	5797	185773	56.0063	1.74766	1.74824	0.242458
#REF!	82.0635	3594	5327	186286	51.8325	1.48219	1.7146	0.170905
#REF!	82.136	3285	4513	183465	55.8493	1.37382	1.74702	0.13793
#REF!	82.2086	3537	4526	189847	53.6746	1.27962	1.72977	0.107079
#REF!	82.2811	3599	4524	188170	52.284	1.25702	1.71837	0.0993407
#REF!	82.3536	3491	4430	185423	53.1146	1.26898	1.72521	0.103454
#REF!	82.4261	3333	4495	177902	53.3759	1.34863	1.72735	0.129894
#REF!	82.4986	3580	5133	182865	51.0796	1.4338	1.70825	0.156488
#REF!	82.5711	3209	6437	183729	57.2543	2.00592	1.75781	0.302314
#REF!	82.6437	3194	5698	177267	55.5	1.78397	1.74429	0.251388
#REF!	82.7162	3101	5249	177269	57.1651	1.69268	1.75713	0.228575
#REF!	82.7887	3291	5083	177930	54.0656	1.54452	1.73292	0.188792
#REF!	82.8612	3319	5083	183224	55.2046	1.53149	1.74198	0.185113
#REF!	82.9337	3281	4687	180413	54.9872	1.42853	1.74026	0.154889
#REF!	83.0062	3155	5049	179128	56.7759	1.60032	1.75416	0.204206
#REF!	83.0788	3114	4982	176483	56.6741	1.59987	1.75338	0.204085
#REF!	83.1513	3571	4828	182023	50.9726	1.352	1.70734	0.130977
#REF!	83.2238	3867	4961	187293	48.4337	1.28291	1.68515	0.108195
#REF!	83.2963	3650	5244	195672	53.6088	1.43671	1.72924	0.15737
#REF!	83.3688	3346	5009	178949	53.4815	1.49701	1.7282	0.175225
#REF!	83.4413	3381	5228	177449	52.4842	1.54629	1.72003	0.18929
#REF!	83.5139	3229	4759	179046	55.4494	1.47383	1.7439	0.168448
#REF!	83.5864	3204	4850	180363	56.2931	1.51373	1.75045	0.180049
#REF!	83.6589	3074	4855	175241	57.0075	1.57938	1.75593	0.198485
#REF!	83.7314	3390	4821	176673	52.1159	1.42212	1.71697	0.152937
#REF!	83.8039	3291	4991	179226	54.4594	1.51656	1.73607	0.18086
#REF!	83.8764	3116	4780	178169	57.1788	1.53402	1.75723	0.18583
#REF!	83.9489	3120	4684	178946	57.3545	1.50128	1.75857	0.176462
#REF!	84.0215	3403	4926	178804	52.5431	1.44755	1.72052	0.160632
#REF!	84.094	3155	5040	178049	56.4339	1.59746	1.75154	0.203431
#REF!	84.1665	3168	4800	177174	55.9261	1.51515	1.74761	0.180456
#REF!	84.239	3092	4918	175912	56.8926	1.59056	1.75506	0.201549
#REF!	84.3115	2958	5197	175206	59.2312	1.75693	1.77255	0.244755
#REF!	84.384	3058	5378	175804	57.4899	1.75867	1.75959	0.245183
#REF!	84.4566	3266	5983	179584	54.9859	1.8319	1.74025	0.262903
#REF!	84.5291	3011	4774	181549	60.2953	1.58552	1.78028	0.200172
#REF!	84.6016	3254	4906	183367	56.3513	1.50768	1.7509	0.17831
#REF!	84.6741	2968	4558	181609	61.189	1.53571	1.78667	0.18631
#REF!	84.7466	2855	4474	179354	62.821	1.56708	1.7981	0.19509
#REF!	84.8191	2967	4494	180847	60.9528	1.51466	1.78499	0.180316
#REF!	84.8917	3086	4223	175351	56.8215	1.36844	1.75451	0.136225
#REF!	84.9642	3152	4276	177869	56.4305	1.3566	1.75151	0.132451
#REF!	85.0367	2999	4876	177104	59.0544	1.62588	1.77125	0.211087
#REF!	85.1092	3208	5487	184048	57.3716	1.71041	1.7587	0.233101
#REF!	85.1817	3581	5989	186981	52.2147	1.67244	1.71779	0.22335
#REF!	85.2542	3679	6085	187631	51.0005	1.65398	1.70757	0.218531
#REF!	85.3268	3640	6242	188696	51.8396	1.71484	1.71466	0.234222
#REF!	85.3993	3822	6969	187964	49.1795	1.82339	1.69178	0.26088
#REF!	85.4718	3606	6724	185725	51.5044	1.86467	1.71184	0.270602
#REF!	85.5443	3657	6910	185551	50.7386	1.88953	1.70534	0.276353
#REF!	85.6168	3330	6653	183709	55.1679	1.9979	1.74169	0.300573
#REF!	85.6893	3267	6348	182182	55.7643	1.94307	1.74636	0.288488
#REF!	85.7619	3294	6377	181683	55.1557	1.93594	1.74159	0.286893
#REF!	85.8344	3232	5795	183024	56.6287	1.79301	1.75304	0.253582
#REF!	85.9069	3384	5402	186046	54.9781	1.59634	1.74019	0.203124
#REF!	85.9794	3931	4817	189668	48.2493	1.22539	1.68349	0.0882736
#REF!	86.0519	3758	5035	188622	50.1921	1.33981	1.70064	0.127043
#REF!	86.1244	3723	5743	189658	50.9423	1.54257	1.70708	0.188246
#REF!	86.1969	3628	5351	186763	51.4782	1.47492	1.71162	0.168768
#REF!	86.2695	3471	5263	193495	55.7462	1.51628	1.74622	0.180779
#REF!	86.342	3636	5097	193240	53.1463	1.40182	1.72547	0.146691
#REF!	86.4145	3616	4905	194397	53.7602	1.35647	1.73046	0.132411
#REF!	86.487	3374	5120	189332	56.115	1.51749	1.74908	0.181125
#REF!	86.5595	3582	5089	187484	52.3406	1.42071	1.71884	0.152507
#REF!	86.632	3493	5200	190930	54.6608	1.48869	1.73768	0.172805
#REF!	86.7046	3423	4766	196929	57.5311	1.39235	1.7599	0.143747
#REF!	86.7771	3399	5691	192629	56.6723	1.67432	1.75337	0.223837
#REF!	86.8496	3820	4628	196268	51.3791	1.21152	1.71079	0.08333
#REF!	86.9221	3700	5685	190492	51.4843	1.53649	1.71168	0.186529
#REF!	86.9946	3493	5027	200386	57.3679	1.43916	1.75867	0.15811
#REF!	87.0671	3210	5235	191025	59.5093	1.63084	1.77459	0.212412
#REF!	87.1397	3181	5808	187392	58.9098	1.82584	1.77019	0.261463
#REF!	87.2122	3522	4654	192745	54.726	1.32141	1.73819	0.121037
#REF!	87.2847	3521	5121	195410	55.4984	1.45442	1.74428	0.162689
#REF!	87.3572	3606	5254	193078	53.5435	1.45702	1.72871	0.163464
#REF!	87.4297	3507	4912	194704	55.5187	1.40063	1.74444	0.146323
#REF!	87.5022	3661	5240	198933	54.3384	1.4313	1.73511	0.155732
#REF!	87.5748	3599	4713	195586	54.3445	1.30953	1.73516	0.117116
#REF!	87.6473	3692	5170	192689	52.191	1.40033	1.7176	0.146229
#REF!	87.7198	3667	5231	192449	52.4813	1.42651	1.72	0.154274
#REF!	87.7923	3872	5603	193110	49.8735	1.44706	1.69787	0.160485
#REF!	87.8648	3671	5261	190858	51.9907	1.43312	1.71593	0.156284
#REF!	87.9373	3788	5533	193323	51.0356	1.46067	1.70787	0.164551
#REF!	88.0099	3994	6065	195771	49.0163	1.51853	1.69034	0.181423
#REF!	88.0824	3800	6440	191089	50.2866	1.69474	1.70145	0.229102
#REF!	88.1549	3779	5602	189756	50.2133	1.4824	1.70082	0.170966
#REF!	88.2274	3905	5358	187723	48.0725	1.37209	1.6819	0.137382
#REF!	88.2999	3983	4746	187011	46.9523	1.19156	1.67166	0.0761174
#REF!	88.3724	3991	5181	192140	48.1433	1.29817	1.68254	0.113332
#REF!	88.4449	4376	5953	198795	45.4285	1.36037	1.65733	0.133659
#REF!	88.5175	4226	5598	203721	48.2066	1.32466	1.68311	0.122103
#REF!	88.59	3923	5681	199758	50.9197	1.44813	1.70689	0.160806
#REF!	88.6625	4122	5777	198283	48.1036	1.4015	1.68218	0.146594
#REF!	88.735	4144	5462	197617	47.6875	1.31805	1.6784	0.119932
#REF!	88.8075	3971	5554	195728	49.2893	1.39864	1.69275	0.145706
#REF!	88.88	3622	5432	187510	51.7697	1.49972	1.71408	0.176011
#REF!	88.9526	3620	5736	184671	51.0141	1.58453	1.70769	0.199901
#REF!	89.0251	3624	6262	188765	52.0875	1.72792	1.71673	0.237525
#REF!	89.0976	3829	6560	188785	49.304	1.71324	1.69288	0.233818
#REF!	89.1701	3787	6090	194303	51.3079	1.60813	1.71018	0.206322
#REF!	89.2426	3668	5481	201379	54.9016	1.49427	1.73958	0.17443
#REF!	89.3151	3737	5193	193838	51.8699	1.38962	1.71492	0.142895
#REF!	89.3877	3840	5037	195400	50.8854	1.31172	1.70659	0.117841
#REF!	89.4602	3808	5149	195085	51.2303	1.35215	1.70953	0.131026
#REF!	89.5327	3908	5073	198848	50.8823	1.29811	1.70657	0.11331
#REF!	89.6052	3965	5248	193446	48.7884	1.32358	1.68832	0.121751
#REF!	89.6777	3879	5245	195238	50.332	1.35215	1.70184	0.131026
#REF!	89.7502	3692	5264	187707	50.8415	1.42579	1.70622	0.154054
#REF!	89.8228	3724	5819	200718	53.8985	1.56257	1.73158	0.193839
#REF!	89.8953	3845	5784	201060	52.2913	1.50429	1.71843	0.177332
#REF!	89.9678	3682	5238	198547	53.9237	1.4226	1.73178	0.153082
#REF!	90.0403	3671	5047	196031	53.3999	1.37483	1.72754	0.138249
#REF!	90.1128	3615	5410	197460	54.6224	1.49654	1.73737	0.175089
#REF!	90.1853	3816	5125	192733	50.5066	1.34303	1.70335	0.128086
#REF!	90.2579	3526	5410	192465	54.5845	1.53432	1.73707	0.185915
#REF!	90.3304	3678	5689	196451	53.4125	1.54676	1.72764	0.189424
#REF!	90.4029	3659	5597	186495	50.9688	1.52965	1.7073	0.184593
#REF!	90.4754	3530	5044	192248	54.4612	1.4289	1.73609	0.155
#REF!	90.5479	3820	4783	192877	50.4914	1.25209	1.70322	0.097637
#REF!	90.6204	3723	4826	190806	51.2506	1.29627	1.7097	0.112694
#REF!	90.6929	3649	4707	190544	52.2181	1.28994	1.71782	0.11057
#REF!	90.7655	3539	4971	196760	55.5976	1.40463	1.74506	0.147563
#REF!	90.838	3638	5063	194852	53.5602	1.3917	1.72884	0.143545
#REF!	90.9105	3525	4812	185970	52.7574	1.36511	1.72228	0.135166
#REF!	90.983	3693	4736	187473	50.7644	1.28243	1.70556	0.108032
#REF!	91.0555	3492	4704	186460	53.3963	1.34708	1.72751	0.129393
#REF!	91.128	3542	5163	187327	52.8874	1.45765	1.72335	0.163654
#REF!	91.2006	3604	4953	185019	51.3371	1.37431	1.71043	0.138084
#REF!	91.2731	3691	4995	186389	50.4982	1.35329	1.70328	0.131391
#REF!	91.3456	3446	4323	189378	54.9559	1.2545	1.74001	0.09847
#REF!	91.4155	3226	4442	180379	55.9141	1.37694	1.74752	0.138914
#REF!	91.4635	3047	4455	179104	58.7804	1.46209	1.76923	0.164975
#REF!	91.5114	3723	4908	197856	53.1442	1.31829	1.72546	0.120012
#REF!	91.5593	3106	4998	188806	60.7875	1.60914	1.78381	0.206595
#REF!	91.6073	3245	4517	187901	57.9048	1.39199	1.76271	0.143635
#REF!	91.6552	3572	4390	186001	52.0719	1.229	1.7166	0.0895531
#REF!	91.7031	3276	4645	184852	56.4261	1.41789	1.75148	0.151642
#REF!	91.751	3320	4617	183713	55.3352	1.39066	1.743	0.143222
#REF!	91.799	3284	4906	189915	57.8304	1.49391	1.76216	0.174324
#REF!	91.8469	3268	4834	184322	56.4021	1.47919	1.7513	0.170025
#REF!	91.8948	3296	5185	181293	55.0039	1.57312	1.74039	0.196762
#REF!	91.9428	3305	5816	187040	56.593	1.75976	1.75276	0.245453
#REF!	91.9907	3055	5252	190241	62.272	1.71915	1.79429	0.235314
#REF!	92.0386	3143	5214	194962	62.0305	1.65892	1.79261	0.219827
#REF!	92.0865	3346	5554	197303	58.9668	1.65989	1.77061	0.22008
#REF!	92.1345	3346	5047	191409	57.2053	1.50837	1.75744	0.178507
#REF!	92.1824	3386	4804	185471	54.7758	1.41878	1.73859	0.151916
#REF!	92.2303	3343	4819	184159	55.0879	1.44152	1.74106	0.158821
#REF!	92.2783	3441	4388	183276	53.2624	1.27521	1.72642	0.105582
#REF!	92.3262	3319	4933	186448	56.176	1.48629	1.74955	0.172104
#REF!	92.3741	3012	4305	178449	59.246	1.42928	1.77266	0.155118
#REF!	92.4221	3249	4783	179619	55.2844	1.47215	1.7426	0.167951
#REF!	92.47	3186	4770	176711	55.4648	1.49718	1.74402	0.175273
#REF!	92.5179	3076	5130	177529	57.7142	1.66775	1.76128	0.222131
#REF!	92.5658	3299	5289	177787	53.8912	1.60321	1.73152	0.204991
#REF!	92.6138	3383	4786	183144	54.1366	1.41472	1.73349	0.150671
#REF!	92.6617	3233	4584	182893	56.5707	1.41788	1.75259	0.151639
#REF!	92.7096	3317	4352	182888	55.1366	1.31203	1.74144	0.117943
#REF!	92.7576	3171	4376	182526	57.561	1.38001	1.76013	0.139881
#REF!	92.8055	3369	4681	183393	54.4354	1.38943	1.73588	0.142838
#REF!	92.8534	3233	4439	186211	57.597	1.37303	1.7604	0.137679
#REF!	92.9013	3216	4894	186046	57.8501	1.52177	1.7623	0.182348
#REF!	92.9493	3595	5094	188083	52.3179	1.41697	1.71865	0.15136
#REF!	92.9972	3446	4871	187343	54.3654	1.41352	1.73532	0.150303
#REF!	93.0451	3492	5345	182128	52.1558	1.53064	1.7173	0.184873
#REF!	93.0931	3223	5763	183309	56.8753	1.78809	1.75492	0.252388
#REF!	93.141	3598	6541	186282	51.7738	1.81795	1.71411	0.259583
#REF!	93.1889	3307	5218	181922	55.0112	1.57787	1.74045	0.19807
#REF!	93.2368	3503	4905	178313	50.9029	1.40023	1.70674	0.146199
#REF!	93.2848	3394	4666	179895	53.0038	1.37478	1.72431	0.138233
#REF!	93.3327	3246	4725	177834	54.7856	1.45564	1.73867	0.163053
#REF!	93.3806	3451	5182	182234	52.8061	1.50159	1.72268	0.176552
#REF!	93.4286	3390	4931	180187	53.1525	1.45457	1.72552	0.162735
#REF!	93.4765	3524	4529	179222	50.8575	1.28519	1.70636	0.108966
#REF!	93.5244	3352	4364	177935	53.0832	1.30191	1.72496	0.114581
#REF!	93.5724	3444	4110	178574	51.8508	1.19338	1.71476	0.0767787
#REF!	93.6203	3148	4586	176200	55.972	1.4568	1.74797	0.163399
#REF!	93.6682	3588	4652	177911	49.585	1.29654	1.69535	0.112787
#REF!	93.7161	3097	4602	178585	57.6639	1.48595	1.7609	0.172005
#REF!	93.7641	3328	4853	180255	54.1632	1.45823	1.7337	0.163827
#REF!	93.812	3413	5117	181385	53.1453	1.49927	1.72547	0.175879
#REF!	93.8599	3520	5139	180723	51.3418	1.45994	1.71047	0.164336
#REF!	93.9079	3394	5018	181656	53.5227	1.47849	1.72854	0.169819
#REF!	93.9558	3186	4736	180983	56.8057	1.4865	1.75439	0.172166
#REF!	94.0037	3584	5428	185193	51.6722	1.51451	1.71326	0.180272
#REF!	94.0516	3420	5252	184801	54.0354	1.53567	1.73268	0.186299
#REF!	94.0996	3239	5001	183635	56.695	1.544	1.75354	0.188646
#REF!	94.1475	3348	5395	184150	55.003	1.61141	1.74039	0.207206
#REF!	94.1954	3284	4785	181234	55.187	1.45706	1.74184	0.163479
#REF!	94.2434	3133	4831	181457	57.918	1.54197	1.76281	0.188077
#REF!	94.2913	3262	4907	179807	55.1217	1.50429	1.74132	0.177332
#REF!	94.3392	3271	4682	182386	55.7585	1.43137	1.74631	0.155751
#REF!	94.3872	3406	4162	180789	53.0796	1.22196	1.72493	0.0870574
#REF!	94.4351	3346	4451	184219	55.0565	1.33025	1.74081	0.123932
#REF!	94.483	3406	4302	181592	53.3153	1.26307	1.72685	0.101426
#REF!	94.5309	3598	4736	197240	54.8193	1.31629	1.73893	0.119351
#REF!	94.5789	3511	4552	191585	54.5671	1.2965	1.73693	0.112771
#REF!	94.6268	3612	4465	189239	52.3917	1.23616	1.71926	0.0920737
#REF!	94.6747	3231	4178	181230	56.091	1.2931	1.74889	0.111631
#REF!	94.7227	3456	4405	183763	53.1722	1.27459	1.72568	0.105372
#REF!	94.7706	3319	4296	178517	53.7864	1.29437	1.73067	0.112057
#REF!	94.8185	3484	5891	183467	52.6599	1.69087	1.72148	0.228111
#REF!	94.8664	3259	11231	180999	55.5382	3.44615	1.74459	0.537334
#REF!	94.9144	3548	5379	183837	51.8143	1.51607	1.71445	0.180718
#REF!	94.9623	3697	4593	185059	50.0565	1.24236	1.69946	0.094247
#REF!	95.0102	3254	4682	181115	55.6592	1.43884	1.74554	0.158014
#REF!	95.0582	3573	4474	180083	50.4011	1.25217	1.70244	0.097663
#REF!	95.1061	3475	4764	177956	51.2104	1.37094	1.70936	0.137017
#REF!	95.154	3472	4806	179146	51.5974	1.38422	1.71263	0.141204
#REF!	95.202	3470	4634	183255	52.8112	1.33545	1.72273	0.125627
#REF!	95.2499	3532	4297	177871	50.3599	1.21659	1.70208	0.0851447
#REF!	95.2978	3377	4528	178914	52.9802	1.34084	1.72411	0.127375
#REF!	95.3457	3674	4546	184103	50.1097	1.23734	1.69992	0.0924903
#REF!	95.3937	3412	4992	178897	52.4317	1.46307	1.71959	0.165266
#REF!	95.4416	3348	4253	175867	52.529	1.27031	1.7204	0.10391
#REF!	95.4895	3129	4444	177324	56.6711	1.42026	1.75336	0.152368
#REF!	95.5375	3520	4562	175078	49.7381	1.29602	1.69669	0.112613
#REF!	95.5854	3401	4701	176251	51.8233	1.38224	1.71452	0.140584
#REF!	95.6333	3493	4818	175062	50.118	1.37933	1.69999	0.139668
#REF!	95.6812	3346	4397	182472	54.5344	1.31411	1.73667	0.118631
#REF!	95.7292	3378	4357	183773	54.4029	1.28982	1.73562	0.110528
#REF!	95.7771	3243	4310	180170	55.5566	1.32902	1.74474	0.12353
#REF!	95.825	3232	4096	178291	55.1643	1.26733	1.74166	0.102889
#REF!	95.873	3059	5595	180794	59.1023	1.82903	1.7716	0.262221
#REF!	95.9209	3136	5213	180699	57.6209	1.66231	1.76058	0.220712
#REF!	95.9688	3247	4459	179623	55.3197	1.37327	1.74288	0.137755
#REF!	96.0168	3144	5840	178956	56.9198	1.85751	1.75526	0.26893
#REF!	96.0647	3329	6906	184344	55.3752	2.0745	1.74332	0.316913
#REF!	96.1126	3256	5265	183713	56.4229	1.61701	1.75146	0.208714
#REF!	96.1605	3318	5843	180297	54.3391	1.761	1.73511	0.24576
#REF!	96.2085	3187	6280	183300	57.5149	1.97051	1.75978	0.294578
#REF!	96.2564	3142	6129	181602	57.7982	1.95067	1.76191	0.290183
#REF!	96.3043	3507	6800	184016	52.4711	1.93898	1.71992	0.287573
#REF!	96.3523	3576	6119	181210	50.6739	1.71113	1.70478	0.233283
#REF!	96.4002	3437	5598	182361	53.0582	1.62875	1.72475	0.211853
#REF!	96.4481	3453	4991	185855	53.8242	1.44541	1.73098	0.159991
#REF!	96.496	3498	4814	183112	52.3476	1.37621	1.7189	0.138686
#REF!	96.544	3393	4433	183502	54.0825	1.30651	1.73306	0.116114
#REF!	96.5919	3345	4844	182803	54.6496	1.44813	1.73759	0.160808
#REF!	96.6398	3542	4756	183867	51.9105	1.34274	1.71526	0.127993
#REF!	96.6878	3348	5384	183466	54.7987	1.60812	1.73877	0.20632
#REF!	96.7357	3398	5567	180747	53.1922	1.63832	1.72585	0.214398
#REF!	96.7836	3495	5813	180648	51.6876	1.66323	1.71339	0.220953
#REF!	96.8315	3433	6230	179297	52.2275	1.81474	1.7179	0.258814
#REF!	96.8795	3392	5809	174625	51.4814	1.71256	1.71165	0.233646
#REF!	96.9274	3682	5013	182551	49.5793	1.36149	1.6953	0.134014
#REF!	96.9753	3505	5432	180180	51.4066	1.54979	1.71102	0.190272
#REF!	97.0233	3607	5672	179613	49.7957	1.5725	1.69719	0.19659
#REF!	97.0712	3719	5440	181371	48.7688	1.46276	1.68814	0.165173
#REF!	97.1191	3349	5132	182775	54.576	1.5324	1.737	0.185372
#REF!	97.1671	3314	4973	178517	53.8675	1.5006	1.73133	0.176266
#REF!	97.215	3133	4660	176554	56.353	1.48739	1.75092	0.172426
#REF!	97.2629	3213	4364	180415	56.1516	1.35823	1.74936	0.132974
#REF!	97.3108	3088	4779	178008	57.6451	1.5476	1.76076	0.18966
#REF!	97.3588	3514	4846	180614	51.3984	1.37906	1.71095	0.139582
#REF!	97.4067	3412	6454	183893	53.896	1.89156	1.73156	0.27682
#REF!	97.4546	3203	6492	184161	57.4964	2.02685	1.75964	0.306822
#REF!	97.5026	3371	6700	182634	54.178	1.98754	1.73382	0.298316
#REF!	97.5505	3408	6417	181974	53.3961	1.88292	1.72751	0.274832
#REF!	97.5984	3267	5142	181193	55.4616	1.57392	1.74399	0.196983
#REF!	97.6463	3369	4903	181448	53.8581	1.45533	1.73125	0.162961
#REF!	97.6943	3125	5318	180452	57.7446	1.70176	1.76151	0.230898
#REF!	97.7422	3142	5304	181068	57.6283	1.6881	1.76064	0.227397
#REF!	97.7901	2992	4956	177065	59.1795	1.65642	1.77217	0.21917
#REF!	97.8381	3181	5436	176306	55.4247	1.7089	1.7437	0.232716
#REF!	97.886	3448	5349	179119	51.9487	1.55133	1.71557	0.190705
#REF!	97.9339	3279	5183	176509	53.8301	1.58066	1.73103	0.19884
#REF!	97.9819	3523	4145	176656	50.1436	1.17655	1.70022	0.0706119
#REF!	98.0298	3210	4679	173977	54.1984	1.45763	1.73399	0.163648
#REF!	98.0777	3349	4408	173829	51.9047	1.31621	1.71521	0.119326
#REF!	98.1256	3170	4596	179734	56.6984	1.44984	1.75357	0.161321
#REF!	98.1736	3396	4612	180524	53.1578	1.35807	1.72557	0.132922
#REF!	98.2215	3306	4311	179792	54.3835	1.30399	1.73547	0.115275
#REF!	98.2694	3364	4711	182094	54.1302	1.40042	1.73344	0.146257
#REF!	98.3174	3607	5113	181755	50.3895	1.41752	1.70234	0.15153
#REF!	98.3653	3449	4697	184663	53.541	1.36184	1.72869	0.134127
#REF!	98.4132	3520	4324	179244	50.9216	1.22841	1.7069	0.089343
#REF!	98.4611	3599	4895	186732	51.8844	1.3601	1.71504	0.133571
#REF!	98.5091	3651	5198	188861	51.7286	1.42372	1.71373	0.153424
#REF!	98.557	3457	5803	184497	53.3691	1.67862	1.72729	0.224953
#REF!	98.6049	3489	5546	182040	52.1754	1.58957	1.71747	0.201279
#REF!	98.6529	3026	6122	175053	57.8496	2.02313	1.7623	0.306024
#REF!	98.7008	3312	5237	179677	54.2503	1.58122	1.7344	0.198992
#REF!	98.7487	3417	5108	182925	53.5338	1.49488	1.72863	0.174606
#REF!	98.7967	3263	4542	179690	55.069	1.39197	1.74091	0.14363
#REF!	98.8446	3420	4233	181188	52.9789	1.23772	1.7241	0.0926222
#REF!	98.8925	3170	4127	180033	56.7927	1.30189	1.75429	0.114575
#REF!	98.9404	3270	4304	181666	55.5554	1.31621	1.74473	0.119325
#REF!	98.9884	3164	4649	183171	57.8922	1.46934	1.76262	0.167123
#REF!	99.0363	3104	4516	179395	57.7948	1.4549	1.76189	0.162832
#REF!	99.0842	3235	3936	178321	55.1224	1.21669	1.74133	0.0851808
#REF!	99.1322	3200	3874	180830	56.5094	1.21063	1.75212	0.0830096
#REF!	99.1801	3109	4014	175853	56.5626	1.29109	1.75253	0.110957
#REF!	99.228	2933	3716	176164	60.0627	1.26696	1.77861	0.102764
#REF!	99.2759	2981	4033	180442	60.5307	1.3529	1.78198	0.131266
#REF!	99.3239	2932	3929	178626	60.9229	1.34004	1.78478	0.127118
#REF!	99.3718	3147	4244	182487	57.9876	1.34859	1.76334	0.129879
#REF!	99.4197	3153	4110	180391	57.2125	1.30352	1.75749	0.115118
#REF!	99.4677	3399	4574	185362	54.5343	1.34569	1.73667	0.128945
#REF!	99.5156	3303	4171	186162	56.3615	1.26279	1.75098	0.101332
#REF!	99.5635	3480	4504	190793	54.8256	1.29425	1.73898	0.112019
#REF!	99.6115	3161	4374	186203	58.9064	1.38374	1.77016	0.141054
#REF!	99.6594	3122	4689	187170	59.952	1.50192	1.7778	0.176647
#REF!	99.7073	3415	4781	187393	54.8735	1.4	1.73936	0.146128
#REF!	99.7552	3352	4476	188553	56.2509	1.33532	1.75013	0.125586
#REF!	99.8032	3427	4889	190910	55.7076	1.42661	1.74591	0.154306
#REF!	99.8511	3316	5770	187945	56.6782	1.74005	1.75342	0.240561
#REF!	99.899	3527	5067	190076	53.8917	1.43663	1.73152	0.157345
#REF!	99.947	3307	5213	185568	56.1137	1.57635	1.74907	0.197654
#REF!	99.9949	3489	4731	189810	54.4024	1.35598	1.73562	0.132252
#REF!	100.043	3058	4801	183933	60.1481	1.56998	1.77922	0.195894
#REF!	100.091	3235	4560	179650	55.5332	1.40958	1.74455	0.149091
#REF!	100.139	2858	3588	180117	63.022	1.25542	1.79949	0.0987902
#REF!	100.187	3017	3630	180048	59.6778	1.20318	1.77581	0.0803313
#REF!	100.235	2902	3751	179291	61.7819	1.29256	1.79086	0.11145
#REF!	100.282	2680	3878	175328	65.4209	1.44701	1.81572	0.160473
#REF!	100.33	2957	5073	179257	60.6212	1.71559	1.78262	0.234414
#REF!	100.378	2996	4666	182670	60.9713	1.55741	1.78513	0.192403
#REF!	100.426	3144	5034	179412	57.0649	1.60115	1.75637	0.204431
#REF!	100.474	3167	3644	180195	56.8977	1.15062	1.75509	0.0609303
#REF!	100.522	3327	4016	178956	53.789	1.20709	1.73069	0.0817409
#REF!	100.57	3300	4523	180277	54.6294	1.37061	1.73743	0.136913
#REF!	100.618	3848	4396	188462	48.9766	1.14241	1.68999	0.0578226
#REF!	100.666	4108	4458	191983	46.7339	1.0852	1.66963	0.0355096
#REF!	100.714	4182	4460	185625	44.3867	1.06648	1.64725	0.0279508
#REF!	100.762	3738	4143	191533	51.2394	1.10835	1.7096	0.0446756
#REF!	100.81	3721	4474	192360	51.6958	1.20236	1.71346	0.0800363
#REF!	100.858	3796	4880	190383	50.1536	1.28556	1.7003	0.109094
#REF!	100.906	4046	5267	190666	47.1246	1.30178	1.67325	0.114537
#REF!	100.953	4113	5521	191825	46.6387	1.34233	1.66875	0.127859
#REF!	101.001	3842	5461	189642	49.3602	1.4214	1.69338	0.152715
#REF!	101.049	3898	5983	192362	49.3489	1.53489	1.69328	0.186077
#REF!	101.097	3480	5029	188958	54.2983	1.44511	1.73479	0.159902
#REF!	101.145	3386	4715	187169	55.2773	1.3925	1.74255	0.143795
#REF!	101.193	3393	4390	184479	54.3705	1.29384	1.73536	0.111881
#REF!	101.241	3600	4423	185569	51.5469	1.22861	1.7122	0.0894144
#REF!	101.289	3843	4648	187017	48.6643	1.20947	1.68721	0.0825957
#REF!	101.337	3768	5294	188551	50.0401	1.40499	1.69932	0.147673
#REF!	101.385	3797	5076	190188	50.089	1.33684	1.69974	0.126081
#REF!	101.433	3701	5563	196793	53.1729	1.50311	1.72569	0.17699
#REF!	101.481	3793	5433	193783	51.0896	1.43238	1.70833	0.156057
#REF!	101.529	3786	5212	190993	50.4472	1.37665	1.70284	0.138824
#REF!	101.577	3677	4842	191792	52.1599	1.31683	1.71734	0.119531
#REF!	101.624	3591	5158	190004	52.9112	1.43637	1.72355	0.157266
#REF!	101.672	3822	4844	190756	49.91	1.2674	1.69819	0.102913
#REF!	101.72	3663	5189	194436	53.0811	1.4166	1.72494	0.151247
#REF!	101.768	3614	5071	194942	53.9408	1.40315	1.73192	0.147105
#REF!	101.816	3411	5360	189314	55.501	1.57139	1.7443	0.196283
#REF!	101.864	3521	4586	190391	54.073	1.30247	1.73298	0.114768
#REF!	101.912	3370	4769	185007	54.8982	1.41513	1.73956	0.150797
#REF!	101.96	3597	5915	186190	51.7626	1.64443	1.71402	0.216014
#REF!	102.008	3472	6489	186093	53.5982	1.86895	1.72915	0.271598
#REF!	102.056	3658	5555	190505	52.079	1.51859	1.71666	0.18144
#REF!	102.104	3702	4886	188154	50.825	1.31983	1.70608	0.120517
#REF!	102.152	3476	4082	185838	53.4632	1.17434	1.72805	0.0697932
#REF!	102.2	3506	4220	193344	55.1466	1.20365	1.74152	0.0805005
#REF!	102.248	3495	4015	194746	55.7213	1.14878	1.74602	0.0602384
#REF!	102.295	3554	4393	196606	55.3196	1.23607	1.74288	0.0920438
#REF!	102.343	3235	4741	197398	61.0195	1.46553	1.78547	0.165996
#REF!	102.391	3292	4359	201794	61.2983	1.32412	1.78745	0.121927
#REF!	102.439	3209	4536	201794	62.8838	1.41352	1.79854	0.150303
#REF!	102.487	3178	4797	200244	63.0094	1.50944	1.79941	0.178816
#REF!	102.535	3202	5418	198710	62.0581	1.69207	1.7928	0.228418
#REF!	102.583	3401	5365	206175	60.6219	1.57748	1.78263	0.197963
#REF!	102.631	3335	5267	209216	62.7334	1.57931	1.7975	0.198467
#REF!	102.679	3514	4441	205066	58.3569	1.2638	1.76609	0.101679
#REF!	102.727	3431	4474	203264	59.2434	1.30399	1.77264	0.115275
#REF!	102.775	3344	4171	198794	59.448	1.24731	1.77414	0.0959739
#REF!	102.823	3249	4087	198383	61.0597	1.25793	1.78575	0.0996549
#REF!	102.871	3391	4087	198662	58.5851	1.20525	1.76779	0.0810768
#REF!	102.919	3620	3625	197514	54.5619	1.00138	1.73689	0.00059944
#REF!	102.967	3414	3600	189449	55.4918	1.05448	1.74423	0.023039
#REF!	103.014	3199	3529	184271	57.6027	1.10316	1.76044	0.0426374
#REF!	103.062	3316	4389	188752	56.9216	1.32358	1.75528	0.121751
#REF!	103.11	3511	4269	186024	52.9832	1.21589	1.72414	0.0848953
#REF!	103.158	3521	5840	192666	54.7191	1.65862	1.73814	0.219747
#REF!	103.206	3714	4685	188844	50.8465	1.26144	1.70626	0.100868
#REF!	103.254	3945	5160	198973	50.4368	1.30798	1.70275	0.116603
#REF!	103.302	3722	3547	201283	54.0793	0.952982	1.73303	-0.0209152
#REF!	103.35	3782	3733	198865	52.582	0.987044	1.72084	-0.00566353
#REF!	103.398	3469	3332	196185	56.5538	0.960507	1.75246	-0.0174993
#REF!	103.446	3839	3496	199590	51.9901	0.910654	1.71592	-0.0406467
#REF!	103.494	4046	4417	195898	48.4177	1.0917	1.685	0.0381015
#REF!	103.542	3884	4039	197894	50.9511	1.03991	1.70715	0.0169946
#REF!	103.59	3953	3557	202900	51.3281	0.899823	1.71036	-0.0458429
#REF!	103.638	4264	3547	201468	47.2486	0.831848	1.67439	-0.079956
#REF!	103.685	4090	3918	202849	49.5963	0.957946	1.69545	-0.0186589
#REF!	103.733	4150	3914	201585	48.5747	0.943133	1.68641	-0.0254273
#REF!	103.781	3787	3752	202062	53.3567	0.990758	1.72719	-0.00403248
#REF!	103.829	3869	3632	204168	52.7702	0.938744	1.72239	-0.0274529
#REF!	103.877	4071	3490	206196	50.65	0.857283	1.70458	-0.0668757
#REF!	103.925	3898	3588	208528	53.4962	0.920472	1.72832	-0.0359894
#REF!	103.973	3653	5399	188032	51.4733	1.47796	1.71158	0.169664
#REF!	104.021	3656	4097	191748	52.4475	1.12062	1.71972	0.0494598
#REF!	104.069	3663	5127	184666	50.4139	1.39967	1.70255	0.146026
#REF!	104.117	3512	7196	179120	51.0023	2.04897	1.70759	0.311537
#REF!	104.165	3356	5479	191154	56.9589	1.6326	1.75556	0.212879
#REF!	104.213	3824	3581	209871	54.8826	0.936454	1.73943	-0.0285136
#REF!	104.261	3438	3586	200927	58.443	1.04305	1.76673	0.0183044
#REF!	104.309	3781	3640	199996	52.895	0.962708	1.72341	-0.0165053
#REF!	104.356	3601	3737	202575	56.2552	1.03777	1.75016	0.0161
#REF!	104.404	3425	3228	198561	57.974	0.942482	1.76323	-0.025727
#REF!	104.452	3537	3105	199221	56.3249	0.877863	1.7507	-0.0565735
#REF!	104.5	3741	3294	199428	53.3087	0.880513	1.7268	-0.0552641
#REF!	104.548	3794	3804	191725	50.5337	1.00264	1.70358	0.00114318
#REF!	104.596	3587	3395	191199	53.3033	0.946473	1.72675	-0.0238916
#REF!	104.644	3464	3392	189083	54.5852	0.979215	1.73707	-0.00912204
#REF!	104.692	3436	3369	187485	54.5649	0.980501	1.73691	-0.00855214
#REF!	104.74	3443	3076	190682	55.3825	0.893407	1.74337	-0.0489507
#REF!	104.788	3544	3164	192055	54.1916	0.892777	1.73393	-0.0492572
#REF!	104.836	3546	3573	195855	55.2327	1.00761	1.7422	0.00329428
#REF!	104.884	3410	3275	196866	57.732	0.960411	1.76142	-0.0175431
#REF!	104.932	3588	4042	194977	54.3414	1.12653	1.73513	0.0517439
#REF!	104.98	3703	3497	199626	53.9093	0.944369	1.73166	-0.0248581
#REF!	105.027	3693	3690	201676	54.6103	0.999188	1.73727	-0.000352941
#REF!	105.075	3697	3678	201256	54.4377	0.994861	1.7359	-0.00223773
#REF!	105.123	3386	3722	197198	58.2392	1.09923	1.76522	0.0410894
#REF!	105.171	3675	3571	195914	53.3099	0.971701	1.72681	-0.0124675
#REF!	105.219	3279	3549	193742	59.0857	1.08234	1.77148	0.0343646
#REF!	105.267	3469	3425	194820	56.1603	0.987316	1.74943	-0.00554372
#REF!	105.315	3301	3638	201522	61.0488	1.10209	1.78568	0.0422172
#REF!	105.363	3557	3437	203982	57.3466	0.966264	1.75851	-0.0149043
#REF!	105.411	3475	3724	199582	57.4337	1.07165	1.75917	0.0300549
#REF!	105.459	3638	3716	202363	55.6248	1.02144	1.74527	0.00921301
#REF!	105.507	3741	3811	199381	53.2962	1.01871	1.7267	0.00805124
#REF!	105.555	3965	3606	198101	49.9624	0.909458	1.69864	-0.0412175
#REF!	105.603	3671	3810	200964	54.7437	1.03786	1.73833	0.0161406
#REF!	105.651	3764	3097	206528	54.8693	0.822795	1.73933	-0.0847084
#REF!	105.698	3647	3416	191497	52.5081	0.93666	1.72023	-0.0284179
#REF!	105.746	3613	3355	197089	54.55	0.928591	1.73679	-0.0321754
#REF!	105.794	3955	3817	193958	49.0412	0.965107	1.69056	-0.0154243
#REF!	105.842	3920	3838	194261	49.5564	0.979082	1.6951	-0.0091811
#REF!	105.89	3807	4078	194424	51.0701	1.07118	1.70817	0.0298643
#REF!	105.938	3869	4235	194052	50.1556	1.0946	1.70032	0.0392547
#REF!	105.986	3996	3709	196017	49.0533	0.928178	1.69067	-0.0323686
#REF!	106.034	4023	3868	200293	49.787	0.961472	1.69712	-0.0170636
#REF!	106.085	4024	4066	200343	49.787	1.01044	1.69712	0.0045094
#REF!	106.161	3971	3928	196954	49.5981	0.989171	1.69546	-0.00472841
#REF!	106.237	4162	4210	197394	47.4277	1.01153	1.67603	0.00498002
#REF!	106.313	4294	4127	201792	46.9939	0.961109	1.67204	-0.0172276
#REF!	106.389	4203	3706	203348	48.3816	0.881751	1.68468	-0.054654
#REF!	106.465	4415	3507	204671	46.3581	0.794337	1.66613	-0.0999949
#REF!	106.541	3987	3474	207169	51.9611	0.871332	1.71568	-0.0598164
#REF!	106.616	3905	3225	200593	51.3682	0.825864	1.71069	-0.0830913
#REF!	106.692	3963	3405	198626	50.1201	0.859198	1.70001	-0.065907
#REF!	106.768	3808	3115	193541	50.8248	0.818015	1.70608	-0.0872389
#REF!	106.844	3999	3302	201571	50.4054	0.825706	1.70248	-0.0831743
#REF!	106.92	3909	3388	203945	52.1732	0.866718	1.71745	-0.0621223
#REF!	106.996	3972	3438	201142	50.64	0.865559	1.70449	-0.0627034
#REF!	107.072	3944	3585	200548	50.8489	0.908976	1.70628	-0.0414477
#REF!	107.147	3957	3242	202263	51.1152	0.819308	1.70855	-0.086553
#REF!	107.223	4138	3410	201278	48.6414	0.82407	1.68701	-0.0840361
#REF!	107.299	3728	3571	199480	53.5086	0.957886	1.72842	-0.0186861
#REF!	107.375	3507	3463	195925	55.8668	0.987454	1.74715	-0.00548327
#REF!	107.451	3604	4002	187039	51.8976	1.11043	1.71515	0.0454923
#REF!	107.527	3838	3261	191517	49.9002	0.849661	1.6981	-0.0707542
#REF!	107.603	3723	3016	200880	53.9565	0.810099	1.73204	-0.0914617
#REF!	107.678	4029	3381	207077	51.3966	0.839166	1.71093	-0.0761521
#REF!	107.754	4277	3119	211755	49.5102	0.729249	1.69469	-0.137124
#REF!	107.83	4406	3469	217019	49.2553	0.787335	1.69245	-0.10384
#REF!	107.906	4244	3320	223951	52.7689	0.782281	1.72238	-0.106637
#REF!	107.982	4236	3399	225878	53.3234	0.802408	1.72692	-0.0956048
#REF!	108.058	4672	3504	235680	50.4452	0.75	1.70282	-0.124939
#REF!	108.134	4080	3363	235342	57.6819	0.824265	1.76104	-0.0839333
#REF!	108.21	4179	3391	230679	55.1996	0.811438	1.74194	-0.0907446
#REF!	108.285	3922	3595	230355	58.7341	0.916624	1.76889	-0.0378087
#REF!	108.361	3831	3804	217940	56.8885	0.992952	1.75502	-0.00307164
#REF!	108.437	4062	3689	204851	50.4311	0.908173	1.7027	-0.0418313
#REF!	108.513	4070	3287	204709	50.2971	0.807617	1.70154	-0.0927947
#REF!	108.589	3950	3154	205813	52.1046	0.798481	1.71688	-0.0977354
#REF!	108.665	4156	3250	213760	51.4341	0.782002	1.71125	-0.106792
#REF!	108.741	4166	3359	213135	51.1606	0.806289	1.70894	-0.0935093
#REF!	108.816	4214	3361	211215	50.1222	0.797579	1.70003	-0.098226
#REF!	108.892	4169	3242	215237	51.628	0.777645	1.71289	-0.109219
#REF!	108.968	4352	3204	212391	48.8031	0.736213	1.68845	-0.132996
#REF!	109.044	4582	3348	207068	45.1916	0.730685	1.65506	-0.13627
#REF!	109.12	4791	3586	216903	45.273	0.748487	1.65584	-0.125816
#REF!	109.196	4492	3899	213598	47.5508	0.867988	1.67716	-0.0614865
#REF!	109.272	4327	4791	205963	47.5995	1.10723	1.6776	0.0442393
#REF!	109.348	4514	4393	206727	45.7969	0.973195	1.66084	-0.0118004
#REF!	109.423	3939	4623	192408	48.8469	1.17365	1.68884	0.0695379
#REF!	109.499	4153	5954	203061	48.895	1.43366	1.68926	0.156447
#REF!	109.575	4546	4235	205075	45.1111	0.931588	1.65428	-0.030776
#REF!	109.651	4782	4062	209563	43.8233	0.849435	1.64171	-0.0708697
#REF!	109.727	4489	3452	203389	45.3083	0.768991	1.65618	-0.114079
#REF!	109.803	4443	3350	202674	45.6165	0.753995	1.65912	-0.122632
#REF!	109.879	4449	3059	205831	46.2646	0.68757	1.66525	-0.162683
#REF!	109.954	4363	3201	207924	47.6562	0.733669	1.67812	-0.1345
#REF!	110.03	4560	3084	208194	45.6566	0.676316	1.6595	-0.16985
#REF!	110.106	4286	2881	202152	47.1657	0.672189	1.67363	-0.172509
#REF!	110.182	4105	2928	194797	47.4536	0.713276	1.67627	-0.146742
#REF!	110.713	4033	2894	205035	50.8393	0.71758	1.7062	-0.14413
#REF!	110.789	3820	3074	199976	52.3497	0.804712	1.71891	-0.0943595
#REF!	110.865	3732	2828	198601	53.2157	0.757771	1.72604	-0.120462
#REF!	110.941	3859	2900	213280	55.2682	0.75149	1.74248	-0.124077
#REF!	111.017	4189	5425	204230	48.7539	1.29506	1.68801	0.112289
#REF!	111.092	4275	3831	210795	49.3088	0.89614	1.69292	-0.047624
#REF!	111.168	4598	5588	210985	45.8863	1.21531	1.66168	0.0846874
#REF!	111.244	4380	5115	212568	48.5315	1.16781	1.68602	0.0673715
#REF!	111.32	4621	6834	206524	44.6925	1.4789	1.65023	0.169939
#REF!	111.396	4358	4159	203445	46.6831	0.954337	1.66916	-0.0202983
#REF!	111.472	4180	3940	201515	48.2093	0.942584	1.68313	-0.0256801
#REF!	111.548	3877	3516	194688	50.2161	0.906887	1.70084	-0.0424469
#REF!	111.775	2588	2429	160887	62.1665	0.938563	1.79356	-0.0275368
#REF!	111.851	2975	3187	174957	58.8091	1.07126	1.76944	0.0298951
#REF!	111.927	3158	3849	177885	56.3284	1.21881	1.75073	0.0859358
#REF!	112.003	3276	4304	177258	54.1081	1.3138	1.73326	0.118528
#REF!	112.079	3151	3435	177698	56.3942	1.09013	1.75123	0.0374783
#REF!	112.155	3415	5633	179779	52.6439	1.64949	1.72135	0.217349
#REF!	112.23	3978	6326	185973	46.7504	1.59025	1.66979	0.201464
#REF!	112.306	3677	5255	190719	51.8681	1.42915	1.7149	0.155079
#REF!	112.382	3646	6542	188470	51.6923	1.7943	1.71343	0.253894
#REF!	112.458	3461	6746	180579	52.1754	1.94915	1.71747	0.289845
#REF!	112.534	3573	5780	176397	49.3694	1.61769	1.69346	0.208895
#REF!	112.61	3168	4502	171655	54.184	1.42109	1.73387	0.15262
#REF!	112.686	3354	3892	174619	52.0629	1.16041	1.71653	0.0646098
#REF!	112.761	3327	9857	177948	53.486	2.96273	1.72824	0.471692
#REF!	112.837	3419	4244	175802	51.4191	1.2413	1.71112	0.0938763
#REF!	112.913	3673	3041	179435	48.8524	0.827934	1.68889	-0.0820045
#REF!	112.989	4215	3261	190018	45.0814	0.773665	1.654	-0.111447
#REF!	113.065	4267	2829	192756	45.1737	0.662995	1.65489	-0.17849
#REF!	113.141	4371	3281	192289	43.992	0.750629	1.64337	-0.124575
#REF!	113.217	4486	5174	192435	42.8968	1.15337	1.63242	0.0619672
#REF!	113.292	4291	5612	191711	44.6775	1.30785	1.65009	0.116559
#REF!	113.368	4269	6302	186362	43.6547	1.47622	1.64003	0.169152
#REF!	113.444	4325	7495	187105	43.2613	1.73295	1.6361	0.238786
#REF!	113.52	4798	3990	185038	38.5657	0.831596	1.5862	-0.0800873
#REF!	113.596	3563	2423	168340	47.2467	0.680045	1.67437	-0.167462
#REF!	113.672	3058	2254	160971	52.6393	0.737083	1.72131	-0.132484
#REF!	113.748	2900	2242	159064	54.8497	0.773103	1.73917	-0.111762
#REF!	113.824	3085	2447	160279	51.9543	0.793193	1.71562	-0.100621
#REF!	113.899	2527	2253	148581	58.7974	0.891571	1.76936	-0.0498441
#REF!	113.975	2256	2424	139240	61.7199	1.07447	1.79042	0.0311935
#REF!	114.051	1917	2580	128831	67.2045	1.34585	1.8274	0.128998
#REF!	114.127	1970	2845	127625	64.7843	1.44416	1.81147	0.159616
#REF!	114.203	2112	2449	125454	59.4006	1.15956	1.77379	0.0642949
#REF!	114.279	1779	2934	126607	71.1675	1.64924	1.85228	0.217284
#REF!	114.355	1943	3153	132265	68.0726	1.62275	1.83297	0.210251
#REF!	114.43	1898	2601	134075	70.6401	1.37039	1.84905	0.136844
#REF!	114.506	1840	2459	132047	71.7647	1.33641	1.85591	0.125941
#REF!	114.582	1882	2460	133099	70.7221	1.30712	1.84956	0.116315
#REF!	114.658	2766	2400	153042	55.3297	0.867679	1.74296	-0.0616409
#REF!	114.734	3264	2202	158289	48.4954	0.674632	1.6857	-0.170933
#REF!	114.81	3212	2408	158183	49.2475	0.749689	1.69238	-0.125119
#REF!	114.886	3799	7978	170297	44.8268	2.10003	1.65154	0.322225
#REF!	114.962	3384	5055	161395	47.6936	1.49379	1.67846	0.174291
#REF!	115.037	3221	2621	158022	49.0599	0.813722	1.69073	-0.0895237
#REF!	115.113	3050	2559	154624	50.6964	0.839016	1.70498	-0.0762296
#REF!	115.189	3227	2541	157378	48.7691	0.787419	1.68815	-0.103794
#REF!	115.265	3334	3417	159934	47.9706	1.0249	1.68098	0.0106794
#REF!	115.341	3083	2495	154655	50.1638	0.809277	1.70039	-0.091903
#REF!	115.644	4135	3203	241617	58.4322	0.774607	1.76665	-0.110919
#REF!	115.72	4368	3241	241756	55.3471	0.741987	1.74309	-0.129604
#REF!	115.796	3131	2682	174396	55.6998	0.856595	1.74585	-0.0672243
#REF!	115.872	3479	2534	161583	46.4452	0.72837	1.66694	-0.137648
#REF!	115.948	3369	2424	156214	46.3681	0.719501	1.66622	-0.142968
#REF!	116.024	2783	2510	132865	47.7416	0.901904	1.6789	-0.0448395
#REF!	116.1	2213	2571	116795	52.7768	1.16177	1.72244	0.0651207
#REF!	116.175	1805	2718	108232	59.9623	1.50582	1.77788	0.177772
#REF!	116.251	2065	2605	109214	52.8881	1.2615	1.72336	0.100888
#REF!	116.301	2424	2563	122904	50.703	1.05734	1.70503	0.024216
#REF!	116.328	1843	2810	104174	56.5241	1.52469	1.75223	0.183181
#REF!	116.355	1857	2878	107192	57.7232	1.54981	1.76135	0.190279
#REF!	116.382	1912	3656	104986	54.909	1.91213	1.73964	0.281518
#REF!	116.41	1905	4216	105001	55.1186	2.21312	1.7413	0.345006
#REF!	116.437	1921	4345	102405	53.3082	2.26184	1.72679	0.354462
#REF!	116.464	1963	4223	107125	54.5721	2.1513	1.73697	0.332701
#REF!	116.491	2016	3344	105273	52.2188	1.65873	1.71783	0.219776
#REF!	116.518	1777	2769	98896	55.6533	1.55824	1.74549	0.192636
#REF!	116.545	1436	2989	92313	64.2848	2.08148	1.80811	0.318371
#REF!	116.573	1411	3471	88030	62.3884	2.45996	1.7951	0.390928
#REF!	116.6	1458	3010	89193	61.1749	2.06447	1.78657	0.314809
#REF!	116.627	1537	3238	92899	60.4418	2.1067	1.78134	0.323603
#REF!	116.654	1534	3116	91119	59.3996	2.03129	1.77378	0.307772
#REF!	116.681	1538	3229	86429	56.1957	2.09948	1.7497	0.322112
#REF!	116.709	1479	3410	87960	59.4726	2.30561	1.77432	0.362786
#REF!	116.736	1536	3270	87216	56.7812	2.12891	1.7542	0.328157
#REF!	116.763	1237	2885	80616	65.1706	2.33226	1.81405	0.367776
#REF!	116.79	1360	3426	82942	60.9868	2.51912	1.78524	0.401248
#REF!	116.817	1285	3481	79555	61.9105	2.70895	1.79176	0.432801
#REF!	116.844	1234	3899	78853	63.9003	3.15964	1.8055	0.499638
#REF!	116.872	1310	4799	82056	62.6382	3.66336	1.79684	0.563879
#REF!	116.899	1428	3959	79796	55.8796	2.77241	1.74725	0.442857
#REF!	116.926	1242	3595	79126	63.7085	2.89452	1.8042	0.461577
#REF!	116.953	1142	3082	75508	66.1191	2.69877	1.82033	0.431167
#REF!	116.98	1310	3182	79269	60.5107	2.42901	1.78183	0.385429
#REF!	117.007	1368	3193	77915	56.9554	2.33406	1.75553	0.368113
#REF!	117.035	1152	2947	77443	67.2248	2.55816	1.82753	0.407928
#REF!	117.062	1187	2842	76411	64.3732	2.39427	1.80871	0.379173
#REF!	117.089	1099	3018	78737	71.6442	2.74613	1.85518	0.438722
#REF!	117.116	1323	3538	81222	61.3923	2.67423	1.78811	0.427198
#REF!	117.143	1252	3238	80286	64.1262	2.58626	1.80704	0.412673
#REF!	117.171	1135	2933	80989	71.3559	2.58414	1.85343	0.412316
#REF!	117.198	1283	3216	83364	64.9758	2.50663	1.81275	0.399089
#REF!	117.225	1281	3080	84015	65.5855	2.40437	1.81681	0.381002
#REF!	117.252	1107	3062	86151	77.8238	2.76603	1.89111	0.441858
#REF!	117.279	1237	3246	86056	69.5683	2.62409	1.84241	0.418979
#REF!	117.306	1378	3695	89836	65.193	2.68142	1.8142	0.428365
#REF!	117.334	1295	3676	87048	67.2185	2.83861	1.82749	0.453106
#REF!	117.361	1401	3640	89945	64.2006	2.59814	1.80754	0.414663
#REF!	117.388	1836	3772	101015	55.0191	2.05447	1.74051	0.312699
#REF!	117.415	2227	3485	110246	49.5043	1.56489	1.69464	0.194483
#REF!	117.442	2095	3957	112373	53.6387	1.88878	1.72948	0.276182
#REF!	117.47	2008	3606	111768	55.6614	1.79582	1.74555	0.254262
#REF!	117.497	2036	3450	115260	56.611	1.6945	1.7529	0.229041
#REF!	117.524	2329	3439	117597	50.4925	1.4766	1.70323	0.169263
#REF!	117.551	1474	3665	89758	60.8942	2.48643	1.78458	0.395576
#REF!	117.578	1093	3132	74689	68.3339	2.86551	1.83464	0.457202
#REF!	117.605	1127	3571	70600	62.6442	3.16859	1.79688	0.500866
#REF!	117.633	897	3840	63070	70.3122	4.28094	1.84703	0.631539
#REF!	117.66	1182	4273	66072	55.8985	3.61506	1.7474	0.558115
#REF!	117.687	1052	4903	72366	68.789	4.66065	1.83752	0.668446
#REF!	117.714	1095	5130	74328	67.8795	4.68493	1.83174	0.670703
#REF!	117.741	1138	5728	73049	64.1907	5.03339	1.80747	0.701861
#REF!	117.769	1088	4931	74408	68.3897	4.53217	1.83499	0.656306
#REF!	117.796	1272	4164	77981	61.3058	3.27358	1.7875	0.515024
#REF!	117.823	1258	4087	76948	61.1669	3.24881	1.78652	0.511724
#REF!	117.85	1176	3828	77125	65.5825	3.2551	1.81679	0.512565
#REF!	117.877	1134	3821	79781	70.3536	3.36949	1.84729	0.527564
#REF!	117.904	999	3817	82987	83.0701	3.82082	1.91944	0.582157
#REF!	117.932	1172	3726	83142	70.9403	3.17918	1.85089	0.502315
#REF!	117.959	1059	3562	76414	72.1568	3.36355	1.85828	0.526798
#REF!	117.986	1135	3742	75768	66.7559	3.29692	1.82449	0.518108
#REF!	118.013	1107	3546	76666	69.2556	3.20325	1.84046	0.505591
#REF!	118.04	1136	3449	79286	69.794	3.03609	1.84382	0.482315
#REF!	118.067	1243	3299	79104	63.6396	2.65406	1.80373	0.423911
#REF!	118.095	1184	3461	80006	67.5726	2.92314	1.82977	0.46585
#REF!	118.122	1106	3225	74979	67.7929	2.91591	1.83118	0.464775
#REF!	118.149	1279	3322	77435	60.5434	2.59734	1.78207	0.414529
#REF!	118.176	1265	3492	78427	61.9976	2.76047	1.79238	0.440984
#REF!	118.203	1259	3442	77931	61.8991	2.73392	1.79168	0.436785
#REF!	118.231	1266	3380	85234	67.3254	2.66983	1.82818	0.426483
#REF!	118.258	1496	3405	84525	56.5007	2.27607	1.75205	0.357186
#REF!	118.285	1304	3292	81234	62.296	2.52454	1.79446	0.402182
#REF!	118.312	1452	3410	85790	59.084	2.34848	1.77147	0.370788
#REF!	118.339	1575	3446	88638	56.2781	2.18794	1.75034	0.340035
#REF!	118.366	1437	3317	79554	55.3612	2.30828	1.74321	0.363289
#REF!	118.394	1042	3334	73119	70.1718	3.19962	1.84616	0.505098
#REF!	118.421	1114	3558	72184	64.7971	3.1939	1.81156	0.504321
#REF!	118.448	1060	3296	75332	71.0679	3.10943	1.85167	0.492681
#REF!	118.475	1191	3245	76835	64.513	2.7246	1.80965	0.435303
#REF!	118.502	1226	3744	82378	67.1925	3.05383	1.82732	0.484845
#REF!	118.53	1698	3416	96643	56.9158	2.01178	1.75523	0.30358
#REF!	118.557	1222	3553	79908	65.3912	2.90753	1.81552	0.463524
#REF!	118.584	1231	3646	73413	59.6369	2.96182	1.77551	0.471559
#REF!	118.611	1023	3829	72795	71.1584	3.74291	1.85223	0.57321
#REF!	118.638	1195	3493	73653	61.6343	2.92301	1.78982	0.465831
#REF!	118.665	1226	3527	71540	58.3524	2.87684	1.76606	0.458915
#REF!	118.693	1205	3751	70191	58.2498	3.11286	1.76529	0.49316
#REF!	118.72	1164	3629	69050	59.3213	3.1177	1.77321	0.493834
#REF!	118.747	1199	3739	71304	59.4696	3.11843	1.77429	0.493936
#REF!	118.774	1117	3507	69875	62.556	3.13966	1.79627	0.496883
#REF!	118.801	1106	3412	72082	65.1736	3.08499	1.81407	0.489254
#REF!	118.829	1105	3851	73228	66.2697	3.48507	1.82131	0.542211
#REF!	118.856	1121	3929	70992	63.3292	3.50491	1.8016	0.544676
#REF!	118.883	1028	3632	71871	69.9134	3.53307	1.84456	0.548153
#REF!	118.91	1142	3269	78757	68.9641	2.86252	1.83862	0.456749
#REF!	118.937	1109	3402	78321	70.6231	3.06763	1.84895	0.486803
#REF!	118.964	1116	3249	71310	63.8978	2.91129	1.80549	0.464086
#REF!	118.992	1052	3210	68836	65.4335	3.05133	1.8158	0.484489
#REF!	119.019	1082	3115	66073	61.0656	2.87893	1.7858	0.459231
#REF!	119.046	1118	3382	68597	61.3569	3.02504	1.78786	0.480732
#REF!	119.073	1059	3226	69416	65.5486	3.04627	1.81656	0.483768
#REF!	119.1	998	3694	72448	72.5932	3.7014	1.8609	0.568366
#REF!	119.127	1091	3893	71546	65.5784	3.56829	1.81676	0.55246
#REF!	119.155	965	4165	69448	71.9668	4.31606	1.85713	0.635088
#REF!	119.182	1132	3806	66083	58.3772	3.36219	1.76624	0.526622
#REF!	119.209	1107	3833	66263	59.8582	3.46251	1.77712	0.539391
#REF!	119.236	1121	3882	67281	60.0187	3.46298	1.77829	0.53945
#REF!	119.263	1077	4024	64949	60.3055	3.7363	1.78036	0.572442
#REF!	119.291	1038	3837	64058	61.7129	3.69653	1.79038	0.567794
#REF!	119.318	931	3734	62499	67.131	4.01074	1.82692	0.603225
#REF!	119.345	947	3903	62079	65.5533	4.12144	1.81659	0.615049
#REF!	119.372	856	4227	68116	79.5748	4.93808	1.90078	0.693558
#REF!	119.399	976	3401	69028	70.7254	3.48463	1.84958	0.542157
#REF!	119.426	937	3574	68155	72.7375	3.8143	1.86176	0.581415
#REF!	119.454	988	4068	70105	70.9565	4.11741	1.85099	0.614624
#REF!	119.481	1136	4671	67630	59.5335	4.1118	1.77476	0.614032
#REF!	119.508	957	4990	64744	67.6531	5.21421	1.83029	0.717189
#REF!	119.535	1057	4378	62001	58.6575	4.14191	1.76832	0.617201
#REF!	119.562	976	4368	62046	63.5717	4.47541	1.80326	0.650833
#REF!	119.59	945	4423	62332	65.9598	4.68042	1.81928	0.670285
#REF!	119.617	919	4405	60255	65.5658	4.79325	1.81668	0.68063
#REF!	119.644	997	4237	64446	64.6399	4.24975	1.8105	0.628363
#REF!	119.671	957	4853	64059	66.9373	5.07106	1.82567	0.705098
#REF!	119.698	904	4501	62428	69.0575	4.97898	1.83921	0.697141
#REF!	119.725	867	4289	63887	73.6874	4.94694	1.86739	0.694337
#REF!	119.753	900	4616	61444	68.2711	5.12889	1.83424	0.710023
#REF!	119.78	951	4545	63431	66.6993	4.77918	1.82412	0.679353
#REF!	119.807	883	4498	64448	72.9875	5.094	1.86325	0.707059
#REF!	119.834	968	4873	63935	66.0486	5.03409	1.81986	0.701921
#REF!	119.861	1000	4565	61647	61.647	4.565	1.78991	0.659441
#REF!	119.889	999	3949	58118	58.1762	3.95295	1.76475	0.596922
#REF!	119.916	958	3910	56452	58.9269	4.08142	1.77031	0.610811
#REF!	119.943	902	4254	58239	64.5665	4.71619	1.81001	0.673591
#REF!	119.97	1035	4566	58116	56.1507	4.41159	1.74936	0.644596
#REF!	119.997	982	4866	59453	60.5428	4.95519	1.78206	0.695061
#REF!	120.024	968	5182	60312	62.3058	5.35331	1.79453	0.728622
#REF!	120.052	1076	5109	65202	60.5967	4.74814	1.78245	0.676524
#REF!	120.079	995	4853	66075	66.407	4.87739	1.82221	0.688187
#REF!	120.106	918	5197	64146	69.8758	5.66122	1.84433	0.75291
#REF!	120.133	1111	4683	74797	67.324	4.21512	1.82817	0.62481
#REF!	120.16	1136	3483	75070	66.0827	3.06602	1.82009	0.486575
#REF!	120.187	1292	3342	75772	58.6471	2.58669	1.76825	0.412744
#REF!	120.215	1228	3291	75078	61.1384	2.67997	1.78631	0.42813
#REF!	120.242	1290	3816	75596	58.6016	2.95814	1.76791	0.471019
#REF!	120.269	1071	4877	67747	63.2558	4.55369	1.8011	0.658363
#REF!	120.296	1044	4933	68040	65.1724	4.7251	1.81406	0.674411
#REF!	120.323	1018	4709	65476	64.3183	4.62574	1.80833	0.665181
#REF!	120.351	921	5137	64827	70.3876	5.57763	1.8475	0.74645
#REF!	120.378	1014	4854	66791	65.8688	4.78698	1.81868	0.680062
#REF!	120.405	993	5089	69321	69.8097	5.12487	1.84392	0.709683
#REF!	120.432	993	4873	70483	70.9799	4.90735	1.85114	0.690847
#REF!	120.459	993	4664	69933	70.426	4.69688	1.84773	0.671809
#REF!	120.486	1036	4912	69776	67.3514	4.74131	1.82835	0.675899
#REF!	120.514	950	4779	69236	72.88	5.03053	1.86261	0.701613
#REF!	120.541	881	4801	69472	78.8558	5.44949	1.89683	0.736356
#REF!	120.568	1097	4652	68417	62.3674	4.24066	1.79496	0.627433
#REF!	120.595	1091	4906	70430	64.5555	4.49679	1.80993	0.652903
#REF!	120.622	1054	5215	70763	67.1376	4.94782	1.82697	0.694414
#REF!	120.65	1145	5296	68557	59.8751	4.62533	1.77725	0.665142
#REF!	120.677	1007	4953	69761	69.2761	4.91857	1.84058	0.691839
#REF!	120.704	1130	5146	68262	60.4088	4.55398	1.7811	0.658391
#REF!	120.731	932	4837	67057	71.9496	5.18991	1.85703	0.71516
#REF!	120.758	1051	4838	67209	63.9477	4.60324	1.80582	0.663063
#REF!	120.785	1041	5474	68405	65.7109	5.25841	1.81764	0.720854
#REF!	120.813	1068	4827	68923	64.5346	4.51966	1.80979	0.655106
#REF!	120.84	1002	4770	69113	68.975	4.76048	1.83869	0.677651
#REF!	120.867	1036	5042	71346	68.8668	4.8668	1.83801	0.687243
#REF!	120.894	1038	5874	73187	70.5077	5.65896	1.84824	0.752737
#REF!	120.921	1180	5824	69739	59.1008	4.93559	1.77159	0.693339
#REF!	120.948	922	5593	70614	76.5879	6.06616	1.88416	0.782914
#REF!	120.976	1034	5710	68616	66.3598	5.52224	1.8219	0.742116
#REF!	121.003	1155	5710	69289	59.9905	4.94372	1.77808	0.694054
#REF!	121.03	1046	4881	71118	67.9904	4.66635	1.83245	0.668977
#REF!	121.057	1024	4542	68203	66.6045	4.43555	1.8235	0.646947
#REF!	121.084	1017	4901	68958	67.8053	4.81908	1.83126	0.682964
#REF!	121.112	946	4917	71779	75.8763	5.19767	1.88011	0.715809
#REF!	121.139	992	4851	75068	75.6734	4.89012	1.87894	0.68932
#REF!	121.166	1131	4764	71367	63.1008	4.2122	1.80003	0.624509
#REF!	121.193	1112	4702	67143	60.3804	4.22842	1.7809	0.626178
#REF!	121.22	982	5034	67509	68.7464	5.12627	1.83725	0.709802
#REF!	121.247	1131	5445	71332	63.0698	4.81432	1.79982	0.682535
#REF!	121.275	1045	5349	70344	67.3148	5.11866	1.82811	0.709156
#REF!	121.302	1000	5027	68979	68.979	5.027	1.83872	0.701309
#REF!	121.329	1119	4794	69876	62.445	4.28418	1.7955	0.631868
#REF!	121.356	1027	5612	71854	69.9649	5.46446	1.84488	0.737547
#REF!	121.383	969	5588	68847	71.0495	5.76677	1.85156	0.760933
#REF!	121.411	928	5679	70603	76.0808	6.11961	1.88128	0.786724
#REF!	121.438	1061	5319	70236	66.1979	5.0132	1.82084	0.700115
#REF!	121.465	1148	5136	71541	62.3179	4.47387	1.79461	0.650683
#REF!	121.492	1050	5186	72678	69.2171	4.93905	1.84021	0.693643
#REF!	121.519	1112	5523	71617	64.4038	4.96673	1.80891	0.69607
#REF!	121.546	1071	6255	71380	66.648	5.84034	1.82379	0.766438
#REF!	121.574	973	5902	70759	72.7225	6.06578	1.86167	0.782886
#REF!	121.601	1079	5441	70928	65.7349	5.04263	1.8178	0.702657
#REF!	121.628	1030	5582	70905	68.8398	5.41942	1.83784	0.733953
#REF!	121.655	1073	5760	73174	68.1957	5.36813	1.83376	0.729823
#REF!	121.682	1100	6068	76163	69.2391	5.51636	1.84035	0.741653
#REF!	121.71	1073	6070	74816	69.726	5.65704	1.84339	0.752589
#REF!	121.737	924	5385	73184	79.2035	5.82792	1.89874	0.765514
#REF!	121.764	1225	5052	70610	57.6408	4.12408	1.76073	0.615327
#REF!	121.791	1025	4817	67760	66.1073	4.69951	1.82025	0.672053
#REF!	121.818	966	5663	72717	75.2764	5.86232	1.87666	0.768069
#REF!	121.845	1039	5722	72975	70.2358	5.50722	1.84656	0.740932
#REF!	121.873	1017	5447	72966	71.7463	5.35595	1.8558	0.728836
#REF!	121.9	1107	5098	76205	68.8392	4.60524	1.83784	0.663252
#REF!	121.927	1120	5517	74759	66.7491	4.92589	1.82445	0.692485
#REF!	121.954	1081	6012	77346	71.5504	5.56152	1.85461	0.745193
#REF!	121.981	1289	5683	76591	59.4189	4.40884	1.77392	0.644325
#REF!	122.008	1148	6006	75371	65.6542	5.23171	1.81726	0.718643
#REF!	122.036	1194	5910	75785	63.4715	4.94975	1.80258	0.694583
#REF!	122.063	1138	5877	74210	65.2109	5.16432	1.81432	0.713013
#REF!	122.09	1173	6108	75549	64.4066	5.20716	1.80893	0.716601
#REF!	122.117	1217	6236	77114	63.364	5.12408	1.80184	0.709616
#REF!	122.144	1173	7714	70184	59.8329	6.5763	1.77694	0.817982
#REF!	122.172	1002	8914	68570	68.4331	8.89621	1.83527	0.949205
#REF!	122.199	1197	7564	72783	60.8045	6.31913	1.78394	0.800657
#REF!	122.226	1193	6218	75343	63.1542	5.21207	1.8004	0.71701
#REF!	122.253	1315	5832	72778	55.3445	4.43498	1.74307	0.646892
#REF!	122.28	1174	6045	75339	64.1729	5.14906	1.80735	0.711728
#REF!	122.307	1125	5853	77148	68.576	5.20267	1.83617	0.716226
#REF!	122.335	1218	6517	79015	64.8727	5.35057	1.81206	0.7284
#REF!	122.362	1129	6324	73194	64.8308	5.60142	1.81178	0.748298
#REF!	122.389	1014	6287	68621	67.6736	6.2002	1.83042	0.792406
#REF!	122.416	934	5534	66490	71.1884	5.92505	1.85241	0.772692
#REF!	122.443	1168	6614	72657	62.2063	5.66267	1.79383	0.753021
#REF!	122.471	1057	5898	69287	65.5506	5.57994	1.81658	0.74663
#REF!	122.498	976	5435	72225	74.001	5.56865	1.86924	0.74575
#REF!	122.525	943	6007	74256	78.7444	6.3701	1.89622	0.804146
#REF!	122.552	1059	6581	67955	64.169	6.21435	1.80733	0.793396
#REF!	122.579	1063	7114	70361	66.191	6.69238	1.8208	0.825581
#REF!	122.606	1024	6788	68495	66.8896	6.62891	1.82536	0.821442
#REF!	122.634	1169	7289	70876	60.6296	6.23524	1.78268	0.794853
#REF!	122.661	1191	7643	74384	62.4551	6.4173	1.79557	0.807352
#REF!	122.688	1048	7728	78114	74.5363	7.37405	1.87237	0.867706
#REF!	122.715	1204	6705	74987	62.2816	5.56894	1.79436	0.745772
#REF!	122.742	1130	6609	74146	65.6159	5.84867	1.81701	0.767057
#REF!	122.77	1117	7379	74883	67.0394	6.60609	1.82633	0.819944
#REF!	122.797	1209	7409	73922	61.1431	6.12821	1.78635	0.787333
#REF!	122.824	1120	7219	71076	63.4607	6.44554	1.8025	0.809259
#REF!	122.851	1094	7377	72392	66.1718	6.74314	1.82067	0.828862
#REF!	122.878	1088	7524	73594	67.6415	6.91544	1.83021	0.83982
#REF!	122.905	1115	7996	73793	66.1821	7.1713	1.82074	0.855598
#REF!	122.933	1123	8010	72912	64.9261	7.13268	1.81242	0.853253
#REF!	122.96	1108	8080	73232	66.0939	7.29242	1.82016	0.862872
#REF!	122.987	1026	7982	73814	71.9435	7.77973	1.85699	0.890964
#REF!	123.014	1206	8068	74263	61.5779	6.68988	1.78943	0.825419
#REF!	123.041	1153	7920	75142	65.1709	6.86904	1.81405	0.836896
#REF!	123.068	1125	7614	75647	67.2418	6.768	1.82764	0.83046
#REF!	123.096	1139	7917	78766	69.1536	6.95083	1.83982	0.842037
#REF!	123.123	1091	7343	75542	69.2411	6.73052	1.84036	0.828049
#REF!	123.15	952	6827	74499	78.2553	7.17122	1.89351	0.855593
#REF!	123.177	1163	7233	75979	65.3302	6.21926	1.81511	0.793739
#REF!	123.204	1151	8310	74434	64.669	7.21981	1.8107	0.858526
#REF!	123.232	1126	9964	75682	67.2131	8.84902	1.82745	0.946895
#REF!	123.259	987	8581	73327	74.2928	8.69402	1.87095	0.939221
#REF!	123.286	1126	9394	75246	66.8259	8.34281	1.82495	0.921312
#REF!	123.313	1245	10548	76478	61.4281	8.47229	1.78837	0.928001
#REF!	123.34	1134	10673	76893	67.8069	9.41182	1.83127	0.973673
#REF!	123.367	1092	12098	74895	68.5852	11.0788	1.83623	1.04449
#REF!	123.395	1052	10176	73789	70.1416	9.673	1.84598	0.985561
#REF!	123.422	989	7972	71056	71.8463	8.06067	1.8564	0.906371
#REF!	123.449	1151	7993	74063	64.3467	6.9444	1.80853	0.841634
#REF!	123.476	1017	8024	72375	71.1652	7.88987	1.85227	0.89707
#REF!	123.503	949	7288	72675	76.5806	7.67966	1.88412	0.885342
#REF!	123.531	1310	7401	76785	58.6145	5.64962	1.76801	0.752019
#REF!	123.558	1153	7489	75117	65.1492	6.49523	1.81391	0.812595
#REF!	123.585	1094	8725	76725	70.1325	7.97532	1.84592	0.901748
#REF!	123.612	1168	7851	76493	65.4906	6.72175	1.81618	0.827482
#REF!	123.639	1070	8193	77815	72.7243	7.65701	1.86168	0.884059
#REF!	123.666	993	9498	76002	76.5378	9.56495	1.88388	0.980683
#REF!	123.694	1112	9361	76922	69.1745	8.41817	1.83995	0.925217
#REF!	123.721	1140	10283	77393	67.8886	9.02018	1.8318	0.955215
#REF!	123.748	1092	8191	71666	65.6282	7.50092	1.81709	0.875114
#REF!	123.775	961	7700	67637	70.3819	8.01249	1.84746	0.903767
#REF!	123.802	924	7401	67623	73.1851	8.00974	1.86442	0.903618
#REF!	123.829	918	6507	65388	71.2288	7.08824	1.85266	0.850538
#REF!	123.857	988	6483	68334	69.164	6.56174	1.83988	0.817019
#REF!	123.884	1000	6640	67625	67.625	6.64	1.83011	0.822168
#REF!	123.911	949	7665	68260	71.9283	8.07692	1.8569	0.907246
#REF!	123.938	1119	8427	73290	65.496	7.53083	1.81621	0.876843
#REF!	123.965	1297	8649	73161	56.4079	6.66847	1.75134	0.824026
#REF!	123.993	1037	8165	74949	72.2748	7.87367	1.85899	0.896177
#REF!	124.02	1169	7821	73378	62.7699	6.69033	1.79775	0.825448
#REF!	124.047	1211	8393	77638	64.1107	6.93064	1.80693	0.840773
#REF!	124.074	1102	8350	80228	72.8022	7.57713	1.86214	0.879505
#REF!	124.101	1053	8678	82411	78.2631	8.24122	1.89356	0.915991
#REF!	124.128	1207	7780	84849	70.2974	6.44573	1.84694	0.809272
#REF!	124.156	1380	8162	86339	62.5645	5.91449	1.79633	0.771918
#REF!	124.183	1329	8793	84434	63.532	6.61625	1.80299	0.820612
#REF!	124.21	1339	8894	83545	62.3936	6.64227	1.79514	0.822317
#REF!	124.237	1443	8997	89375	61.9369	6.23493	1.79195	0.794831
#REF!	124.264	1331	9807	89117	66.9549	7.36814	1.82578	0.867358
#REF!	124.292	1341	10562	92673	69.1074	7.87621	1.83952	0.896317
#REF!	124.319	1467	9388	91561	62.4138	6.39945	1.79528	0.806143
#REF!	124.346	1466	10240	90382	61.6521	6.98499	1.78995	0.844166
#REF!	124.373	1315	11058	92452	70.3057	8.40913	1.84699	0.924751
#REF!	124.4	1409	14084	96640	68.5877	9.99574	1.83625	0.999815
#REF!	124.427	1357	13115	91369	67.3316	9.6647	1.82822	0.985188
#REF!	124.455	1363	26011	89387	65.5811	19.0836	1.81678	1.28066
#REF!	124.482	1255	82007	87957	70.0853	65.3442	1.84563	1.81521
#REF!	124.509	922	274951	71062	77.0738	298.211	1.88691	2.47452
#REF!	124.645	912	283975	66693	73.1283	311.376	1.86409	2.49329
#REF!	124.672	1118	219310	73159	65.4374	196.163	1.81583	2.29262
#REF!	124.699	1048	195372	75723	72.2548	186.424	1.85887	2.2705
#REF!	124.726	1163	159476	82037	70.5391	137.125	1.84843	2.13712
#REF!	124.754	1115	156028	82394	73.896	139.935	1.86862	2.14593
#REF!	124.781	1288	113398	83775	65.0427	88.0419	1.8132	1.94469
#REF!	124.808	1419	50091	91048	64.1635	35.3002	1.80729	1.54778
#REF!	124.835	1536	31484	111931	72.8717	20.4974	1.86256	1.3117
#REF!	124.862	1408	29118	112100	79.6165	20.6804	1.901	1.31556
#REF!	124.889	1592	21725	109887	69.0245	13.6464	1.839	1.13502
#REF!	124.917	1566	18123	112473	71.8218	11.5728	1.85626	1.06344
#REF!	124.944	1710	16915	116222	67.9661	9.89181	1.83229	0.995276
#REF!	124.971	1567	19258	115928	73.9809	12.2897	1.86912	1.08954
#REF!	124.998	1487	14934	103486	69.5938	10.043	1.84257	1.00187
#REF!	125.053	1679	17924	110235	65.6552	10.6754	1.81727	1.02838
#REF!	125.08	1766	14554	108771	61.5917	8.24122	1.78952	0.915992
#REF!	125.107	1763	15742	110855	62.8786	8.9291	1.7985	0.950808
#REF!	125.134	1645	15982	108460	65.9331	9.7155	1.8191	0.987465
#REF!	125.161	1842	16479	117432	63.7524	8.94625	1.8045	0.951641
#REF!	125.188	1753	13546	108455	61.8682	7.72732	1.79147	0.888029
#REF!	125.216	1805	12905	108284	59.9911	7.14958	1.77809	0.854281
#REF!	125.243	1773	12458	106245	59.9239	7.02651	1.7776	0.84674
#REF!	125.27	1617	12999	109230	67.551	8.03896	1.82963	0.9052
#REF!	125.297	1711	12762	107933	63.0818	7.4588	1.7999	0.872669
#REF!	125.324	1751	12441	110011	62.8275	7.10508	1.79815	0.851569
#REF!	125.352	1646	12728	108889	66.1537	7.73269	1.82055	0.88833
#REF!	125.379	1861	12525	110531	59.3933	6.73025	1.77374	0.828031
#REF!	125.406	1630	12182	109548	67.2074	7.47362	1.82742	0.873531
#REF!	125.433	1746	10864	109189	62.5367	6.22222	1.79613	0.793946
#REF!	125.46	1688	10438	106391	63.0278	6.18365	1.79953	0.791245
#REF!	125.487	1713	11321	108607	63.4016	6.60887	1.8021	0.820127
#REF!	125.515	1808	11495	107905	59.682	6.35785	1.77584	0.803311
#REF!	125.542	1699	12110	109665	64.5468	7.12772	1.80987	0.852951
#REF!	125.569	1775	11897	111111	62.5977	6.70254	1.79656	0.826239
#REF!	125.596	1629	11983	111067	68.1811	7.35605	1.83366	0.866644
#REF!	125.623	2006	13128	124351	61.9895	6.54437	1.79232	0.815868
#REF!	125.651	1664	11249	109324	65.6995	6.76022	1.81756	0.829961
#REF!	125.678	1742	10364	108806	62.4604	5.94948	1.7956	0.774479
#REF!	125.705	1771	10559	109852	62.0282	5.96217	1.79259	0.775404
#REF!	125.732	1773	9837	103938	58.6227	5.54822	1.76807	0.744154
#REF!	125.759	1566	9674	100694	64.3001	6.17752	1.80821	0.790814
#REF!	125.786	1596	9922	102059	63.9467	6.21679	1.80582	0.793566
#REF!	125.814	1776	10061	104512	58.8468	5.66498	1.76972	0.753198
#REF!	125.841	1743	11130	107224	61.5169	6.38554	1.78899	0.805198
#REF!	125.868	1764	12028	109551	62.1037	6.81859	1.79312	0.833695
#REF!	125.895	1803	12763	110438	61.2524	7.07876	1.78712	0.849957
#REF!	125.922	1798	12874	114029	63.4199	7.16018	1.80223	0.854924
#REF!	125.949	1734	14024	110254	63.5836	8.08766	1.80335	0.907823
#REF!	125.977	1788	14772	109686	61.3456	8.26174	1.78778	0.917072
#REF!	126.004	1769	14206	108134	61.1272	8.03053	1.78623	0.904744
#REF!	126.031	1709	13594	108105	63.2563	7.95436	1.8011	0.900605
#REF!	126.058	1807	14215	110006	60.8777	7.86663	1.78446	0.895789
#REF!	126.085	1748	15451	114358	65.4222	8.83924	1.81573	0.946415
#REF!	126.113	1928	14965	115588	59.9523	7.76193	1.77781	0.88997
#REF!	126.14	1833	15456	113529	61.9362	8.43208	1.79194	0.925935
#REF!	126.167	2047	15446	117598	57.4489	7.54568	1.75928	0.877698
#REF!	126.194	1892	14946	113976	60.241	7.89958	1.77989	0.897604
#REF!	126.221	1990	16041	114978	57.7779	8.0608	1.76176	0.906378
#REF!	126.248	1948	17101	119112	61.1458	8.77875	1.78637	0.943433
#REF!	126.276	2063	16716	119489	57.92	8.10276	1.76283	0.908633
#REF!	126.303	1998	18923	123810	61.967	9.47097	1.79216	0.976395
#REF!	126.33	1886	20948	118010	62.5716	11.1071	1.79638	1.0456
#REF!	126.357	1815	20081	116063	63.9466	11.0639	1.80582	1.04391
#REF!	126.384	1862	24283	119633	64.2497	13.0414	1.80787	1.11532
#REF!	126.412	2087	24909	121988	58.4514	11.9353	1.76679	1.07683
#REF!	126.439	1944	26900	120877	62.1795	13.8374	1.79365	1.14106
#REF!	126.466	1998	31322	120381	60.2508	15.6767	1.77996	1.19525
#REF!	126.493	2034	32292	120117	59.0546	15.8761	1.77125	1.20074
#REF!	126.52	2023	29098	118671	58.6609	14.3836	1.76835	1.15787
#REF!	126.547	1960	33878	119473	60.9556	17.2847	1.78501	1.23766
#REF!	126.575	2059	35460	123453	59.9577	17.222	1.77785	1.23608
#REF!	126.602	2045	39276	129799	63.4714	19.2059	1.80258	1.28343
#REF!	126.629	1944	40134	129583	66.6579	20.6451	1.82385	1.31482
#REF!	126.656	1909	38981	125981	65.9932	20.4196	1.8195	1.31005
#REF!	126.683	1771	37075	120866	68.2473	20.9345	1.83409	1.32086
#REF!	126.711	1839	37784	120904	65.7444	20.5459	1.81786	1.31273
#REF!	126.738	1941	36277	121199	62.4415	18.6899	1.79547	1.27161
#REF!	126.765	1975	34978	115442	58.4516	17.7104	1.7668	1.24823
#REF!	126.792	1971	34546	114644	58.1654	17.5271	1.76466	1.24371
#REF!	126.819	1917	27011	115913	60.4658	14.0902	1.78151	1.14892
#REF!	126.846	1896	20060	113688	59.962	10.5802	1.77788	1.02449
#REF!	126.874	1903	20827	114235	60.0289	10.9443	1.77836	1.03919
#REF!	126.901	1953	28717	114945	58.8556	14.704	1.76979	1.16744
#REF!	126.928	1863	27522	110843	59.497	14.7729	1.7745	1.16947
#REF!	126.955	1899	29050	115433	60.7862	15.2975	1.78381	1.18462
#REF!	126.982	1797	33659	118082	65.7106	18.7307	1.81764	1.27255
#REF!	127.009	1923	37824	118861	61.8102	19.6693	1.79106	1.29379
#REF!	127.037	1915	40183	120114	62.7227	20.9833	1.79742	1.32187
#REF!	127.064	1806	36327	119531	66.1855	20.1146	1.82076	1.30351
#REF!	127.091	1755	34829	115186	65.633	19.8456	1.81712	1.29766
#REF!	127.118	1854	40131	118187	63.747	21.6456	1.80446	1.33537
#REF!	127.145	1922	41718	118385	61.5947	21.7055	1.78954	1.33657
#REF!	127.173	2029	39993	115593	56.9704	19.7107	1.75565	1.2947
#REF!	127.2	1854	45183	114630	61.8285	24.3706	1.79119	1.38687
#REF!	127.227	1991	43212	117386	58.9583	21.7037	1.77055	1.33653
#REF!	127.254	2040	49933	120472	59.0549	24.477	1.77126	1.38876
#REF!	127.281	1953	54648	118595	60.7245	27.9816	1.78336	1.44687
#REF!	127.308	1857	45192	118341	63.727	24.336	1.80432	1.38625
#REF!	127.336	1931	42790	117302	60.7468	22.1595	1.78352	1.34556
#REF!	127.363	1968	44194	115171	58.5218	22.4563	1.76732	1.35134
#REF!	127.39	2182	41063	122031	55.9262	18.819	1.74762	1.2746
#REF!	127.417	1951	37537	120050	61.5325	19.2399	1.7891	1.2842
#REF!	127.444	2146	33112	121030	56.3979	15.4296	1.75126	1.18836
#REF!	127.472	2196	34551	124252	56.5811	15.7336	1.75267	1.19683
#REF!	127.499	1903	29007	119609	62.8529	15.2428	1.79833	1.18306
#REF!	127.526	2078	28087	122945	59.1651	13.5164	1.77207	1.13086
#REF!	127.553	2049	29575	125461	61.2304	14.4339	1.78697	1.15938
#REF!	127.58	2244	27540	130464	58.139	12.2727	1.76447	1.08894
#REF!	127.607	1980	21655	123499	62.3732	10.9369	1.795	1.03889
#REF!	127.635	1994	18125	124076	62.2247	9.08977	1.79396	0.958553
#REF!	127.662	1790	17866	123590	69.0447	9.98101	1.83913	0.999174
#REF!	127.689	2029	20674	122289	60.2706	10.1893	1.78011	1.00814
#REF!	127.716	1967	19629	127071	64.6014	9.97916	1.81024	0.999094
#REF!	127.743	2122	19040	128008	60.3242	8.97267	1.78049	0.952922
#REF!	127.77	2091	17636	125900	60.2104	8.43424	1.77967	0.926046
#REF!	127.798	1996	15840	123631	61.9394	7.93587	1.79197	0.899595
#REF!	127.825	1847	17482	121434	65.7466	9.46508	1.81787	0.976124
#REF!	127.852	1758	14694	118993	67.6866	8.35836	1.8305	0.922121
#REF!	127.879	1672	14346	117106	70.0395	8.58014	1.84534	0.933495
#REF!	127.906	1861	13280	117316	63.0392	7.13595	1.79961	0.853452
#REF!	127.934	1848	12633	120186	65.0357	6.83604	1.81315	0.834805
#REF!	127.961	1863	13670	117950	63.3119	7.33763	1.80149	0.865556
#REF!	127.988	1854	14634	121673	65.6273	7.8932	1.81708	0.897253
#REF!	128.015	1975	14138	121565	61.5519	7.15848	1.78924	0.854821
#REF!	128.042	1971	13262	122041	61.9183	6.72856	1.79182	0.827922
#REF!	128.069	2141	12610	126565	59.1149	5.88977	1.7717	0.770098
#REF!	128.097	2055	13440	128806	62.6793	6.54015	1.79712	0.815587
#REF!	128.124	2055	13258	127548	62.0672	6.45158	1.79286	0.809666
#REF!	128.151	2028	13271	130961	64.5764	6.54389	1.81007	0.815836
#REF!	128.178	2025	11897	129810	64.1037	5.87506	1.80688	0.769012
#REF!	128.205	2066	10544	128524	62.2091	5.10358	1.79385	0.707875
#REF!	128.233	2212	10366	127271	57.5366	4.68626	1.75994	0.670826
#REF!	128.26	1993	11935	125464	62.9523	5.98846	1.79901	0.777315
#REF!	128.287	2053	10254	129212	62.9381	4.99464	1.79891	0.698504
#REF!	128.314	2143	10114	131034	61.1451	4.71955	1.78636	0.673901
#REF!	128.341	2121	11155	132638	62.5356	5.25931	1.79613	0.720929
#REF!	128.368	2155	10972	132364	61.4218	5.09142	1.78832	0.706839
#REF!	128.396	2169	11772	133498	61.5482	5.42739	1.78922	0.734591
#REF!	128.423	2146	12251	134103	62.4897	5.70876	1.79581	0.756542
#REF!	128.45	2397	11846	134799	56.2365	4.94201	1.75002	0.693904
#REF!	128.477	2319	11891	133882	57.7326	5.12764	1.76142	0.709918
#REF!	128.504	2361	8654	140520	59.5172	3.6654	1.77464	0.564121
#REF!	128.532	2474	9417	141601	57.2357	3.80639	1.75767	0.580513
#REF!	128.559	2476	10193	143050	57.7746	4.11672	1.76174	0.614551
#REF!	128.586	2251	9694	145264	64.5331	4.30653	1.80978	0.634128
#REF!	128.613	2499	9349	145341	58.1597	3.7411	1.76462	0.572999
#REF!	128.64	2472	9576	147497	59.6671	3.87379	1.77573	0.588136
#REF!	128.667	2386	9681	148037	62.044	4.05742	1.7927	0.60825
#REF!	128.695	2340	9768	139701	59.7013	4.17436	1.77598	0.62059
#REF!	128.722	2499	9468	145099	58.0628	3.78872	1.7639	0.578492
#REF!	128.749	2508	9590	152452	60.7863	3.82376	1.78381	0.582491
#REF!	128.776	2613	8985	144947	55.4715	3.43858	1.74407	0.536379
#REF!	128.803	2311	8567	141743	61.3341	3.70705	1.7877	0.569029
#REF!	128.83	2094	9009	137594	65.7087	4.30229	1.81762	0.6337
#REF!	128.858	2172	8972	140140	64.5212	4.13076	1.8097	0.616029
#REF!	128.885	2214	9329	143580	64.8509	4.21364	1.81192	0.624657
#REF!	128.912	2336	9450	143762	61.542	4.04538	1.78917	0.606959
#REF!	128.939	2268	9336	145335	64.0807	4.1164	1.80673	0.614518
#REF!	128.966	2359	10077	143657	60.8974	4.27173	1.7846	0.630603
#REF!	128.994	2414	9299	145912	60.4441	3.85211	1.78135	0.585699
#REF!	129.021	2401	8610	143978	59.9658	3.58601	1.7779	0.554611
#REF!	129.048	2368	8874	145644	61.5051	3.74747	1.78891	0.573738
#REF!	129.075	2383	10479	143202	60.0932	4.3974	1.77883	0.643196
#REF!	129.102	2578	10167	146836	56.9573	3.94375	1.75555	0.59591
#REF!	129.129	2333	10776	143610	61.5559	4.61895	1.78927	0.664543
#REF!	129.157	2390	12253	145175	60.7427	5.12678	1.78349	0.709845
#REF!	129.184	2337	12843	143938	61.5909	5.49551	1.78952	0.740008
#REF!	129.211	2328	14040	143264	61.5395	6.03093	1.78915	0.780384
#REF!	129.238	2199	14360	138904	63.1669	6.53024	1.80049	0.814929
#REF!	129.265	2160	13489	139809	64.7264	6.24491	1.81108	0.795526
#REF!	129.293	2244	13536	140031	62.4024	6.03209	1.7952	0.780467
#REF!	129.32	2513	13311	143406	57.0657	5.29686	1.75637	0.724018
#REF!	129.347	2330	13539	140807	60.4322	5.81073	1.78127	0.764231
#REF!	129.374	2463	15848	144851	58.8108	6.43443	1.76946	0.80851
#REF!	129.401	2330	16359	148414	63.697	7.02103	1.80412	0.846401
#REF!	129.428	2324	17544	147226	63.3503	7.54905	1.80175	0.877892
#REF!	129.456	2482	16914	148087	59.6644	6.81467	1.77572	0.833445
#REF!	129.483	2457	18225	146569	59.6536	7.41758	1.77564	0.870262
[truncated: 21,697 more rows]
